# Supplementary material for: Leflunomide treatment for patients hospitalised with COVID-19: DEFEAT-COVID randomised controlled trial
Source: PubMed Central journal article supplement — BMJ Open. 2023 Apr 13;13(4):e068179. doi: 10.1136/bmjopen-2022-068179 (PMC10105917; doi:10.1136/bmjopen-2022-068179), 2023-04-13
Supplement: bmjopen-2022-068179.draft_revisions.pdf [file bmjopen-2022-068179.draft_revisions.pdf]

# BMJ Open

BMJ Open is committed to open peer review. As part of this commitment we make the peer review history of every article we publish publicly available.

When an article is published we post the peer reviewers' comments and the authors' responses online. We also post the versions of the paper that were used during peer review. These are the versions that the peer review comments apply to.

The versions of the paper that follow are the versions that were submitted during the peer review process. They are not the versions of record or the final published versions. They should not be cited or distributed as the published version of this manuscript.

BMJ Open is an open access journal and the full, final, typeset and author-corrected version of record of the manuscript is available on our site with no access controls, subscription charges or pay-per-view fees (<http://bmjopen.bmj.com>).

If you have any questions on BMJ Open's open peer review process please email [info.bmjopen@bmj.com](mailto:info.bmjopen@bmj.com)

# BMJ Open

## Leflunomide Treatment for Patients Hospitalised with COVID-19: DEFEAT-COVID Randomised Controlled Trial

|                               |                                                                                                                                                                                                                                                                                                                                                                                                                                                                                                                                                                                                                                                                                                                                                                                                                                                                                                                                                                                                                                                                                                                                                                                                                                                                                              |
|-------------------------------|----------------------------------------------------------------------------------------------------------------------------------------------------------------------------------------------------------------------------------------------------------------------------------------------------------------------------------------------------------------------------------------------------------------------------------------------------------------------------------------------------------------------------------------------------------------------------------------------------------------------------------------------------------------------------------------------------------------------------------------------------------------------------------------------------------------------------------------------------------------------------------------------------------------------------------------------------------------------------------------------------------------------------------------------------------------------------------------------------------------------------------------------------------------------------------------------------------------------------------------------------------------------------------------------|
| Journal:                      | <i>BMJ Open</i>                                                                                                                                                                                                                                                                                                                                                                                                                                                                                                                                                                                                                                                                                                                                                                                                                                                                                                                                                                                                                                                                                                                                                                                                                                                                              |
| Manuscript ID                 | bmjopen-2022-068179                                                                                                                                                                                                                                                                                                                                                                                                                                                                                                                                                                                                                                                                                                                                                                                                                                                                                                                                                                                                                                                                                                                                                                                                                                                                          |
| Article Type:                 | Original research                                                                                                                                                                                                                                                                                                                                                                                                                                                                                                                                                                                                                                                                                                                                                                                                                                                                                                                                                                                                                                                                                                                                                                                                                                                                            |
| Date Submitted by the Author: | 09-Sep-2022                                                                                                                                                                                                                                                                                                                                                                                                                                                                                                                                                                                                                                                                                                                                                                                                                                                                                                                                                                                                                                                                                                                                                                                                                                                                                  |
| Complete List of Authors:     | Kralj-Hans, Ines; Ashford and Saint Peter's Hospitals NHS Trust, Li, Kuo; Imperial College London<br>Wesek, Adrian; Imperial College London<br>Lamorgese, Alexia; JB Medical Ltd<br>Omar, Fatima; Ashford and Saint Peter's Hospitals NHS Trust<br>Ranasinghe, Kapila; Ashford and Saint Peter's Hospitals NHS Trust<br>McGee, Megan; Ashford and Saint Peter's Hospitals NHS Trust<br>Brack, Kieran; Ashford and Saint Peter's Hospitals NHS Trust<br>Li, Shiliang; East China University of Science and Technology<br>Aggarwal, Ritesh; Max Hospital<br>Bulle, Ajay; Meditrina institute of medical science<br>Kodre, Aparna; Noble Hospital<br>Sharma, Shashank; Ashford and Saint Peter's Hospitals NHS Trust, St Peters Hospital Emergency Department<br>Fluck, David; Ashford and Saint Peter's Hospitals NHS Trust, Cardiology<br>John, Isaac; Ashford and Saint Peter's Hospitals NHS Trust<br>Sharma, Pankaj; Royal Holloway University of London<br>Belsey, Jonathan; JB Medical Ltd<br>Li, Ling; University of Kent<br>Seshasai, Sreenivasa Rao Kondapally; St George's University Hospitals NHS Foundation Trust<br>Li, HongLin; Shanghai Key Laboratory of New Drug Design<br>Marczin, N; Imperial College London<br>Chen, Zhong; Ashford and Saint Peter's Hospitals NHS Trust |
| Keywords:                     | COVID-19, INFECTIOUS DISEASES, Respiratory infections < THORACIC MEDICINE                                                                                                                                                                                                                                                                                                                                                                                                                                                                                                                                                                                                                                                                                                                                                                                                                                                                                                                                                                                                                                                                                                                                                                                                                    |
|                               |                                                                                                                                                                                                                                                                                                                                                                                                                                                                                                                                                                                                                                                                                                                                                                                                                                                                                                                                                                                                                                                                                                                                                                                                                                                                                              |

SCHOLARONE™  
Manuscripts

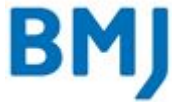

I, the Submitting Author has the right to grant and does grant on behalf of all authors of the Work (as defined in the below author licence), an exclusive licence and/or a non-exclusive licence for contributions from authors who are: i) UK Crown employees; ii) where BMJ has agreed a CC-BY licence shall apply, and/or iii) in accordance with the terms applicable for US Federal Government officers or employees acting as part of their official duties; on a worldwide, perpetual, irrevocable, royalty-free basis to BMJ Publishing Group Ltd ("BMJ") its licensees and where the relevant Journal is co-owned by BMJ to the co-owners of the Journal, to publish the Work in this journal and any other BMJ products and to exploit all rights, as set out in our [licence](#).

The Submitting Author accepts and understands that any supply made under these terms is made by BMJ to the Submitting Author unless you are acting as an employee on behalf of your employer or a postgraduate student of an affiliated institution which is paying any applicable article publishing charge ("APC") for Open Access articles. Where the Submitting Author wishes to make the Work available on an Open Access basis (and intends to pay the relevant APC), the terms of reuse of such Open Access shall be governed by a Creative Commons licence – details of these licences and which [Creative Commons](#) licence will apply to this Work are set out in our licence referred to above.

Other than as permitted in any relevant BMJ Author's Self Archiving Policies, I confirm this Work has not been accepted for publication elsewhere, is not being considered for publication elsewhere and does not duplicate material already published. I confirm all authors consent to publication of this Work and authorise the granting of this licence.

1  
2  
3 **Leflunomide Treatment for Patients Hospitalised with COVID-19: DEFEAT-COVID Randomised**  
4 **Controlled Trial**  
5

6  
7  
8 Authors:

9 Ines Kralj-Hans<sup>1</sup>, Kuo Li<sup>2</sup>, Adrian Wesek<sup>3</sup>, Alexia Lamorgese<sup>4</sup>, Fatima Omar<sup>1</sup>, Kapila Ranasinghe<sup>1</sup>, Megan  
10 McGee<sup>1</sup>, Kieran Brack<sup>1</sup>, Shiliang Li<sup>5</sup>, Ritesh Aggarwal<sup>6</sup>, Ajay Bulle<sup>7</sup>, Aparna Kodre<sup>8</sup>, Shashank Sharma<sup>1</sup>, David  
11 Fluck<sup>1</sup>, Isaac John<sup>1</sup>, Pankaj Sharma<sup>9</sup>, Jonathan Belsey<sup>4</sup>, Ling Li<sup>3</sup>, Sreenivasa Rao Kondapally Seshasai<sup>10</sup>,  
12 \*HongLin Li<sup>5</sup>, \*Nandor Marczin<sup>2</sup>, \*Zhong Chen<sup>1</sup>, on behalf of DEFEAT-COVID Investigators  
13  
14

15  
16  
17 \*Joint senior authors  
18

19 Affiliations:

- 20 1. Ashford and St Peter's Hospital NHS Foundation Trust, UK  
21 2. Faculty of Medicine, Imperial College London, UK  
22 3. University of Kent, UK  
23 4. JB Medical, UK  
24 5. Shanghai Key Laboratory of New Drug Design, School of Pharmacy, East China University of Science and  
25 Technology, China  
26 6. Max Hospital, New Delhi, India  
27 7. Meditrina institute of medical science, Nagpur, India  
28 8. Noble Hospital, Pune, India  
29 9. Institute of cardiovascular research, Royal Holloway, University of London, UK  
30 10. St George's University Hospitals NHS Foundation Trust, UK  
31  
32  
33  
34  
35  
36  
37

38 Corresponding author: Dr Ines Kralj-Hans, [i.kralj-hans@nhs.net](mailto:i.kralj-hans@nhs.net)

39 Ashford and St Peter's Hospital NHS Foundation Trust, Guildford Street, Chertsey, KT16 0PZ, UK  
40  
41  
42  
43  
44  
45  
46  
47  
48  
49  
50  
51  
52  
53  
54  
55  
56  
57  
58  
59  
60

**Abstract**

Objective: To evaluate the clinical efficacy and safety of leflunomide (L) added to the standard of care (SOC) treatment in COVID-19 patients hospitalised with moderate/critical clinical symptoms.

Design: Prospective, open-label, multicentre, stratified, randomised clinical trial.

Setting: Five hospitals in United Kingdom and India, from September 2020 to May 2021.

Participants: Adults with polymerase-chain-reaction (PCR) confirmed COVID-19 infection with moderate/critical symptoms within 15-days of onset.

Intervention: Leflunomide 100mg/day (3-days) followed by 10-20mg/day (7-days) added to standard care.

Primary outcomes: The time to clinical improvement (TTCI) defined as two-point reduction on a clinical status scale or live discharge prior to 28 days; safety profile measured by the incidence of adverse events (AE) within 28 days.

Results: Eligible patients (n=214; age 56.3±14.9 years; 33% female) were randomised to SOC+L (n=104) and SOC group (n=110), stratified according to their clinical risk profile. TTCI was 7 vs. 8 days in SOC+L vs. SOC group (HR 1.317; CI 0.980, 1.768; p=0.070). Incidence of serious adverse events was similar between the groups and none was attributed to leflunomide. In sensitivity analyses, excluding 10 patients not fulfilling the inclusion criteria and 3 who withdrew consent before leflunomide treatment, TTCI was 7 vs. 8 days (HR 1.416, CI 1.041, 1.935; p=0.028), indicating a trend in favour of the intervention group. All-cause mortality rate was similar between groups, 9/104 vs. 10/110. Duration of oxygen dependence was shorter in the SOC+L group being a median 6-days (IQR 4-8) compared to 7-days (IQR 5-10) in SOC group (p=0.047).

Conclusion: Leflunomide, added to the SOC treatment for COVID-19, was safe and well tolerated but had no major impact on clinical outcomes. It may shorten the time of oxygen dependence by one day and thereby improve TTCI /hospital discharge in moderately affected COVID-19 patients.

**Trial registration**

EUDRACT: CTA 21517/0004/001-0001 2020-004994-27

ClinicalTrials.gov: NCT05007678

### Strengths and limitations

- International, prospective, randomised controlled study
- Repurposing a marketed drug with established safety profile and promising dual antiviral and immunomodulating medication based on strong drug discovery data.
- Study participants had milder COVID-19 disease than originally intended, thus eroding the power of the study
- Evolving standard of care therapy possibly diminished measurable benefit of leflunomide

For peer review only

## Introduction

COVID-19 pandemic caused unprecedented strain on health care services around the world. It has affected almost 16 million people globally and caused over 6 million deaths so far.<sup>1</sup> Symptoms include pneumonia, systemic inflammatory response and cardiovascular complications with high morbidity and mortality. Progressive deterioration is thought to be related to the kinetics of viral replication culminating in a surge of inflammatory mediator release, “cytokine storm”.<sup>2</sup> Around 5-10% of infected patients experience severe or life-threatening symptoms with high mortality.<sup>3</sup>

Direct-acting and host-targeting antiviral treatments are the two approaches in treating viral infections. Host targeting antiviral treatments may have an advantage over direct antivirals as they enable the body to fight against a broad spectrum of viruses by simultaneously blocking viral replication and overcoming the potential of viral mutagenesis.<sup>4</sup> Anti-inflammatory medications have been shown to improve survival through dampening of the inappropriate immune response in susceptible patients.<sup>5</sup> This has led to the search for a drug with such therapeutic properties.

Leflunomide is a drug licenced to treat rheumatoid arthritis (RA).<sup>6</sup> It is widely available, cost-effective and can be easily administered both in the hospital and domestic settings. In preclinical models of cell and animal infection by SARS-CoV-2, leflunomide was shown to be a potent inhibitor of human dihydroorotate dehydrogenase (DHODH), an enzyme vital to viral replication in the host cell.<sup>7,8,9</sup> It has the potential advantage of not only targeting the virus infection but also suppressing the ensuing inflammatory response which may play a role in more progressive stages of infection leading to serious complications.

The DEFEAT-COVID study (Targeting *de novo* pyrimidine biosynthesis by leflunomide for treatment of corona virus disease 2019) tested whether leflunomide added to standard care was clinically effective and safe for COVID-19 moderate/severe symptoms.

## Methods

*Study design* – This was a multicentre, international, open label, prospective, randomised controlled clinical trial set up at 5 hospitals (two in UK and three in India). The recruitment took place between September 2020 and May 2021, and was approved by all relevant ethics committees.

*Participants* - Patients aged 18 years and above presenting with moderate to critical symptoms of PCR-confirmed COVID-19 disease within 15 days of symptoms onset were recruited. Patients with respiratory compromise and blood oxygen saturation (SpO<sub>2</sub>) <93% on room air detected on pulse oximeter were considered to fulfil the moderate infection criteria. Patients with respiratory failure, septic shock and/or multiple organ dysfunction/failure needing assisted ventilation were considered to be critically ill. Pregnant or breast-feeding women, individuals already receiving specific monoclonal antibody therapy or those with severe immunodeficiency syndrome and hypoalbuminaemia and patients with hypersensitivity to leflunomide or liver

1  
2  
3 enzymes aspartate transaminase (AST) / alanine transaminase (ALT)  $\geq 2$  x upper limits of normal (ULN) were  
4 excluded from the study. All participants gave written informed consent to a member of their clinical care team.  
5  
6

7  
8 *Randomisation* – Consented participants were randomised by a member of the clinical care team to either the  
9 control arm (receiving standard of care treatment [SOC] alone) or the intervention arm (SOC treatment +  
10 leflunomide (SOC+L)) using a stratified block randomisation web-based algorithm. Patient admission data (age  
11  $\leq/\geq 70$ ; co-morbidities; clinical status based on National Early Warning Score 2, NEWS2)<sup>10</sup> were used to stratify  
12 patients into 4 risk categories. Group 1: high/moderate comorbidity risk with NEWS2 score  $\geq 5$ ; Group 2:  
13 high/moderate comorbidity risk with NEWS2 score  $< 5$ ; Group 3: low comorbidity risk with NEWS2 score  $\geq 5$ ;  
14 and Group 4: low comorbidity risk with NEWS2 score  $< 5$ .  
15  
16  
17  
18

19  
20 *Interventions* - The definition of the SOC treatment for COVID-19 evolved nationally and internationally through  
21 the course of our study, with progressive evolution in the understanding of disease pathology and emerging  
22 treatment evidence. The SOC during the time of the study across all sites involved four main treatment domains:  
23 steroids, anticoagulation, antibiotics, and antiviral medications. The intervention group (SOC+L) received oral  
24 leflunomide at a loading dose of 100mg/day for three days and then 20mg/day for 7 days as a maintenance dose.  
25 The maintenance dose was reduced to 10mg/day if liver enzymes AST/ALT exceeded 2 x ULN. Leflunomide  
26 treatment was stopped early if AST/ATL exceeded 3 x ULN during the intervention. Study participants received  
27 additional COVID-19 therapies, including monoclonal antibodies, at the discretion of the direct care clinical team,  
28 even if leflunomide was initiated.  
29  
30  
31  
32  
33

34 *Study procedures* - Patient related clinical/investigation data, treatment compliance, outcomes and adverse events  
35 (AE) were collected by the site investigators and recorded on the pre-specified daily electronic case report form  
36 (e-CRF) (see **Error! Reference source not found.**). Adverse events (AE) were graded according to the Common  
37 Terminology Criteria for Adverse Events.<sup>11</sup> Blood samples were collected and processed for quantifying viral load  
38 (on days 1, 7, 11, 15, 28 or day of discharge) and for future inflammatory profiling (on days 1, 3 and 11). Liver  
39 enzymes were measured at baseline, on day 3 after the leflunomide loading and on discharge. Patient questionnaire  
40 was administered at 28- and 90-days after randomisation to monitor the persistence of symptoms possibly  
41 associated with long COVID syndrome.<sup>12</sup>  
42  
43  
44  
45  
46

47 *Blinding* - Site investigator teams and direct clinical care teams were not blinded to the randomisation outcomes,  
48 but neither were provided information about the aggregate patient outcomes.  
49  
50  
51  
52  
53  
54  
55  
56  
57  
58  
59  
60



1  
2  
3 *Outcomes* - The primary outcome is the time (days) from randomisation to clinical improvement (TTCI) of two  
4 points on a seven-category clinical status scale or live discharge from hospital prior to 28 days.<sup>13</sup> The clinical  
5 status ordinal scale consisted of the following: 1 not hospitalised, resumption of normal activities; 2 not  
6 hospitalised, but unable to resume normal activities; 3 hospitalised, not requiring supplemental oxygen; 4  
7 hospitalised, requiring supplemental oxygen; 5 hospitalised, requiring nasal high-flow oxygen (HFNC) therapy,  
8 non-invasive mechanical ventilation (NIV), or both; 6 hospitalised, requiring extracorporeal membrane  
9 oxygenation (ECMO), invasive mechanical ventilation (IMV), or both; and 7 death.

10  
11  
12  
13  
14  
15 Safety profile of leflunomide in this group of patients was assessed from incidence rates of AE deemed to be  
16 serious and/or severe ( $\geq$ Grade 3). Grading guidelines suggest 5 categories: 1 mild, asymptomatic or mild  
17 symptoms, clinical or diagnostic observations only, intervention not indicated; 2 moderate, minimal, local or non-  
18 invasive intervention indicated, limiting age-appropriate instrumental activities of daily livings (ADL); 3 severe,  
19 medically significant but not immediately life-threatening, hospitalization or prolongation of hospitalization  
20 indicated, disabling; limiting self-care ADL; 4 life-threatening consequences, urgent intervention indicate; 5 death  
21 related to AE. In addition, the incidences, and levels of liver transaminitis (ALT, AST) were assessed.

22  
23  
24  
25  
26 The main secondary outcomes were focused on overall (all-cause) mortality, and oxygen dependence (duration in  
27 days) assessed by S/F ratio (i.e. oxygen saturation detected by pulse oximeter [SPO<sub>2</sub>] / supplemental oxygen  
28 concentration [FiO<sub>2</sub>]) and impact on viral replication (viral load). Additional secondary outcomes included  
29 inflammatory targets such as CRP, lymphocyte counts, and selected cytokines (initially focussing on IL2, IL6,  
30 TNF- $\alpha$ ). The concept of long COVID emerged during the study, so we used the data from our questionnaires at  
31 28 and 90 days to comment on long COVID symptoms

### 32 33 34 35 36 **Statistical analyses**

37 *Sample size calculation* - The primary outcome measure was a time-to-event analysis based on an assessment of  
38 TTCI. Since our study protocol was conceived and developed during the initial peak of the global pandemic, the  
39 precise hazard ratio for major clinical outcomes related to this infection was largely unknown and, therefore,  
40 sample size calculation was based on the proportion of patients expected to meet the outcome criteria by 28 days.<sup>14</sup>  
41 Assuming  $\alpha = 0.05$ ,  $\beta = 0.20$  and allocation ratio = 1:1, the number of patients per treatment arm was estimated  
42 to be 74. We expected a 20% attrition rate, so the total number of patients required in the study was calculated to  
43 be 178, 89 patients in each arm.

44  
45  
46  
47 *Analysis population* - The full analysis set was defined according to the intention to treat principle (ITT). All  
48 subjects randomised were included in the ITT analysis set for the primary outcome, regardless of whether they  
49 received any dose of their allocated treatment. This analysis set was used to summarize baseline patient  
50 characteristics and to carry out all efficacy and safety assessments. Subjects were analysed according to their  
51 randomised treatment allocation. We also present a modified intention to treat analysis for the primary and  
52 secondary outcomes to account for study participants who were randomised in error and those who withdrew  
53 consent prior to the intervention.

54  
55  
56  
57 *Primary outcomes* - The TTCI data was estimated using Kaplan-Meier survival curves. Hazard ratio and 95%  
58 confidence intervals were estimated using Cox proportional hazards regression models. The primary analysis was  
59  
60

1  
2  
3 stratified by the randomisation strata (baseline risk indicators and NEWS2 score). Log rank test was used for  
4 comparing the Kaplan-Meier curves, hazard ratios and their confidence intervals for the significance of the  
5 treatment effect.  
6

7 *Secondary outcomes* - Continuous secondary outcomes were evaluated for within-groups differences using the  
8 Mann-Whitney U or Wilcoxon rank tests, respectively, depending on the data distribution identified: parametric  
9 or non-parametric. Statistical normality was assessed using the Shapiro-Wilk method. Categorical outcomes were  
10 assessed for between-group differences using the chi-square method and expressed as %. For all outcomes,  
11 statistical significance was accepted at a 2-sided  $\alpha$  of 0.05.  
12

13 *Adverse events* - AEs were coded using MedDRA and assigned grades based on National Cancer Institute  
14 Common Terminology Criteria for Adverse Events Version 4.03.<sup>11</sup>  
15  
16  
17  
18  
19

### 20 **Public and patient involvement**

21 Patient volunteers were consulted regarding the study design and materials to be provided to the potential  
22 participants (patient information sheet, consent forms, questionnaires). Two lay members were appointed to the  
23 Trial Steering Committee and provided input on the conduct of the study.  
24  
25  
26  
27  
28  
29  
30  
31  
32  
33  
34  
35  
36  
37  
38  
39  
40  
41  
42  
43  
44  
45  
46  
47  
48  
49  
50  
51  
52  
53  
54  
55  
56  
57  
58  
59  
60

## Results

### Recruitment, Randomisation, Assignment of Therapy and Follow-up

Between September 2020 and May 2021, 214 patients were recruited to the study from 2 UK Hospitals (n=66, 31%; Ashford and St Peters' NHS Trust, Surrey; Kingston Hospital NHS Trust, London) and 3 Hospitals in India; (n=148, 69%; Max Hospital, Delhi; Meditrina Institute, Nagpur; Noble Hospital, Pune). Due to the wavering new COVID-19 infections, the UK recruitment came to a halt in February 2021 and patients at the three Indian sites were recruited in the remaining period. Of the 214 participating patients, 104 were randomised to the intervention (SOC+L) group and 110 to the control (SOC) group. In the SOC+L group, 3 patients withdrew study consent after randomisation, and did not receive leflunomide therapy. During the data cleaning process, 10 patients were flagged as not meeting the inclusion criteria (6 in SOC+L; 4 in SOC), as they did not have moderate COVID-19 symptoms at the time of randomisation. Daily clinical data were collected for all patients during hospitalisation and the patients were asked to complete follow-up questionnaires at 28- and 90-days after randomisation, as shown in Figure 1 (CONSORT diagram).

Baseline patient characteristics were similar between the SOC+L and SOC groups, summarised in Table 1.

| Characteristics                               | SOC+L<br>n=104 | SOC<br>n=110 | p* |
|-----------------------------------------------|----------------|--------------|----|
| <b>Age, yrs</b>                               |                |              |    |
| mean ± sd                                     | 55.2±14.7      | 56.4±15.2    | NS |
| <b>BMI, kg/m<sup>2</sup></b>                  |                |              |    |
| mean ± sd                                     | 27.3±5.1       | 27.7±5.6     | NS |
| <b>Gender at birth, %</b>                     |                |              |    |
| Female                                        | 28.8           | 37.3         | NS |
| <b>Ethnicity, %</b>                           |                |              |    |
| South Asian                                   | 75.0           | 69.0         | NS |
| White                                         | 24.0           | 30.0         |    |
| Arab                                          | -              | 0.91         |    |
| <b>Comorbidities, %</b>                       |                |              |    |
| BMI ≥ 40 kg/m <sup>2</sup>                    | 2.9            | 4.6          |    |
| Age ≥ 70 yrs                                  | 18.3           | 20.0         |    |
| Chronic respiratory disease                   | 10.0           | 15.6         |    |
| Chronic cardiovascular disease                | 15.0           | 15.6         |    |
| Chronic renal disease                         | 5.0            | 4.7          |    |
| Diabetes                                      | 39.9           | 36.0         | NS |
| Immunosuppressive diseases                    | 11.7           | 10.9         |    |
| Others                                        |                |              |    |
| Malignant neoplasm                            | 6.7            | 4.7          |    |
| Chronic haematologic disease                  | 1.7            | 1.6          |    |
| Chronic neurological disorder                 | 18.3           | 6.3          |    |
| Malnutrition                                  | 1.67           | 1.6          |    |
| Smoking (present or past)                     | 36.7           | 34.4         |    |
| <b>Symptom duration at randomisation, day</b> |                |              |    |
| median (IQR)                                  | 6 (4-8)        | 6 (5-8)      | NS |
| <b>NEWS 2 score at randomisation</b>          |                |              |    |
| median (IQR)                                  | 6 (4-8)        | 5 (4-8)      | NS |

|                                                 |           |            |    |
|-------------------------------------------------|-----------|------------|----|
| <b>CRP at randomisation</b>                     |           |            |    |
| median (IQR)                                    | 28 (9-77) | 32 (13-64) | NS |
| <b>Transaminase at randomisation &gt;ULN, %</b> |           |            |    |
| ALT                                             | 44.7      | 31.7       | NS |
| AST                                             | 35.4      | 28.4       |    |
| <b>Stratification, %</b>                        |           |            |    |
| Group 1                                         | 12.5      | 14.5       |    |
| Group 2                                         | 14.4      | 16.4       | NS |
| Group 3                                         | 48.1      | 46.4       |    |
| Group 4                                         | 25.0      | 22.7       |    |

For peer review only

**Table 1: Baseline patient characteristics at the time of randomization**

\*NS = non-significant,  $p \geq 0.05$  significant

BMI: Body mass index; ULN = upper limits of normal; Group 1: High/Moderate comorbidity risk with NEWS2 score  $\geq 5$ ; Group 2: High/Moderate comorbidity risk with NEWS2 score  $< 5$ ; Group 3: Low comorbidity risk with NEWS2 score  $\geq 5$ ; and Group 4: Low comorbidity risk with NEWS2 score  $< 5$ . Creatinine ULN: 104  $\mu\text{mol/L}$ ; ALT ULN: 49 U/L; AST ULN: 48 U/L; Immunosuppressive disease: asplenia, rheumatological disorder.

## Treatment Assignment and Compliance

Full course of leflunomide therapy was completed by 81/104 patients (78%). Of the 19 patients (16 in UK, 3 in India) who did not complete treatment, 3 patients did not receive a single dose of leflunomide as they withdrew consent soon after randomization, 5 patients died prior to completion of the full course, 8 patients stopped leflunomide early when ALT/AST exceeded 3 x ULN laboratory reference range, 1 patient had tocilizumab introduced to replace leflunomide, 1 patient self-discharged early and 1 refused final two doses. Leflunomide treatment compliance appeared to be better in participants from Indian centres as 92% of them received the full dose of leflunomide compared to 52% of patients in the UK centres which was largely due to a higher incidence of liver enzyme transaminitis and mortality observed in the UK cohort.

There was no significant difference in the assignment of standard of care treatment between the SOC+L and SOC groups as shown in Figure 1. It included corticosteroids, anticoagulants, antibiotics, and antiviral therapies. There were some differences in the proportions of patients receiving additional adjunct therapies such as hydroxychloroquine and immunotherapy (Supplementary table 1). Overall, hydroxychloroquine was prescribed to similar proportion of patients in the intervention and the control group (47%) but the proportions of patients receiving it in the UK was much smaller, 3% compared to 67% in India. A small number of patients received immunomodulating drugs such as interferon alpha and beta (n = 20 in India), tocilizumab and bevacizumab (n = 5 in the UK, n = 2 in India).

## Primary Outcomes

*Time to clinical improvement of 2 points on a clinical status scale/discharge before 28 days*

In the ITT analyses (n = 214), SOC+L group did not have a significantly shorter TTCI than the SOC group within 28 days of randomisation; the median was 7.0 (IQR 7.0 - 8.0) days vs. 8.0 (IQR 7.0 - 9.0) days, respectively; with a hazard ratio (HR) of 1.32 (CI 0.98 -1.77), p = 0.070 (Figure 2).

In modified ITT population (n = 201) where 3 patients who withdrew consent after being randomised to the SOC+L group but never received leflunomide treatment and 10 patients who did not fulfil moderate COVID-19 symptoms at randomisation were excluded from analysis, the median TTCI was significantly shorter in the SOC+L group than SOC group by 1.0 day, median 7.0 days (IQR 7.0 -8.0) vs. 8.0 (IQR 7.0 – 9.0), respectively, with a HR of 1.42 ( CI 1.04 – 1.94); p = 0.028.

## Safety

Incidences of AE of all grades are summarized in Table 2.

| Patients                                            | SOC+L<br>(n = 104) | SOC<br>(n = 110) |
|-----------------------------------------------------|--------------------|------------------|
| Adverse events (n) / Patients (n)                   | 121 / 55           | 91 / 38          |
| Grade 1 (Mild)                                      | 58 / 39            | 48 / 32          |
| Grade 2 (Moderate)                                  | 23 / 13            | 17 / 9           |
| Grade 3 (Severe)/ Grade 4 (Life threatening events) | 31/15              | 16/9             |
| Grade 5 (Deaths)                                    | 9                  | 10               |

**Table 2: Incidence of reported adverse events in both treatment arms.**

At least one AE was reported in 99/214 participants, and most of them were mild in severity. AEs of moderate grade were reported in 13/104 patients in SOC+L group and 9/110 patients in SOC group. Serious AEs (n=47) were reported in 15/104 patients in SOC+L groups and 9/110 in SOC group and 19 patients died (9 in SOC+L group, 10 in the SOC group). There was no significant difference in the incidence of AE reported between the two groups. No Serious AEs were attributed to leflunomide.

### *Liver function*

At baseline, more patients with greater than ULN levels of ALT and AST were randomized in the SOC+L group than the SOC group (ALT: 46 vs 33,  $p = 0.049$ ; AST: 31 vs 24,  $p = 0.340$ ). By Day 3/4, following the initial loading of leflunomide therapy in the SOC+L group, there was a significantly higher number of patients with greater than ULN level of ALT and AST in the SOC+L than the SOC group (64 vs 38,  $p < 0.001$ ; and 51 vs 24,  $p < 0.001$ ). By discharge, the difference in the number of patients with ALT and AST transaminitis between the SOC+L and SOC groups was no longer significant (28 vs 27,  $p = 0.633$ ; and 20 vs 17,  $p = 0.318$ ) (Supplementary table 2). Leflunomide therapy was terminated early if transaminase levels exceeded 3 x ULN. However, there were 5 patients in India who continued with leflunomide therapy at the discretion of the researcher and direct care team with close monitoring of their liver function. Interestingly, in this subset of patients, the transaminase levels improved despite continuation of therapy. There were no adverse events related to clinically significant liver injury due to leflunomide. AEs related to liver dysfunction were reported in 16/104 (15.4%) patients in SOC+L group, 7 were mild, 8 were moderate and 1 was severe. Of these, 10 were deemed possibly treatment related and leflunomide treatment was discontinued in 9 patients. Comparatively, in the control group, 6/110 (5.5%) patients had liver dysfunction related AE. Five of them were mild and 1 case was severe.

### **Secondary Outcomes**

A modified intent to treat approach was used for data from 201 patients for all secondary outcomes. This included 95 patients in the SOC+L group and 106 patients in SOC group. For these analyses we excluded 3 patients in the SOC+L group who withdrew consent and never received leflunomide and 10 patients (6 SOC+L; 4 SOC) who did not fulfil moderate COVID symptoms inclusion criterion.

### *Mortality*

There was no difference in all-cause mortality within 28 days of randomization between the treatment arms as 9/95 (9.47%) of patients died in SOC+L group compared to 10/106 (9.43%) in SOC groups. The survival curves diverge in favour of the SOC+L group after 10 days of hospital treatment, but the curves converged again after 3 weeks (when majority of the patients have been discharged). All deaths were attributed to complications related to Covid-19 (Figure 3, panel A)

### *Oxygenation and assisted ventilation*

Oxygen independence is defined by maintenance of SpO<sub>2</sub>/FiO<sub>2</sub> Air ratio > 4.43. There was a difference in the median time the participants required to be completely weaned off oxygen therapy between groups; 6.0 (IQR 4.0 – 8.0) days in the SOC + L group vs. 7.0 (5.0 – 10.0) days in the SOC group, p = 0.047 (Figure 3, panel B)

Non-invasive ventilation was required for 14.4% of patients in SOC+L group vs. 16.4% in the SOC group. The duration of non-invasive ventilation was 6.0 (IQR 2.0-9.0) days in the SOC+L group compared to 4.5 days (IQR 2.3-6.8) in the SOC group. The proportion of patients admitted to level-2 Intensive Care Unit (ICU) was 8.7 % in the SOC+L group and 8.2% in the SOC group. The median time spent at ICU was 8.0 (IQR 5.0-10.0) days vs. 9.0 (IQR 5.0-13.0) days, respectively. Invasive ventilation was required for 3.9% of patients in the SOC+L group and 5.5% in the SOC group with median duration of 6 (IQR 4.8, 6.0) days vs. 7.0 (IQR 5.3 - 11.8) days, respectively. None of the between group comparisons were statistically significant. Patients recruited in India were significantly less likely to require invasive or non-invasive ventilation or be admitted to ICU compared to patients recruited in the UK (p<0.001).

### *Viral load*

Quantitative SARS-COV-2 PCR measurements from nasopharyngeal swabs at baseline showed no difference in median log viral loads between the two groups, SOC+L 4.68 (IQR 4.45-4.85) vs SOC 4.76 (IQR 4.48-4.92). We clustered the serial samples to reflect the crucial time intervals during the hospital stay: time coinciding with finishing leflunomide loading dose (by Day 4), time to 75% patients being discharged from hospital (by Day 7), time to finishing leflunomide maintenance dose (by Day 11) and beyond (Figure 4). Viral loads were significantly reduced in both treatment arms. There was no significant difference in the overall rate of the viral load clearance between the two groups by Day 11.

### *Cytokines, CRP and lymphocytes*

Cytokine levels were assessed separately for UK and Indian sites as two laboratories using different assays processed the samples. The median baseline levels of IL 2, IL 6 and TNF- $\alpha$  levels (UK: IL2 0.43 [IQR 0.30-0.62] pg/ml; IL6 6.2 [IQR 2.9-9.7] pg/ml; TNF- $\alpha$  10.1 [IQR 7.8 -13.5] pg/ml; India: IL2 4.3 [IQR 2.8-5.8] pg/ml; IL6 12.6 [IQR 6.5-43.1] pg/ml; TNF- $\alpha$  6.1 [IQR 4.9-7.1] pg/ml) were not significantly raised from



1  
2  
3 normal reference ranges and were not different between treatment groups in both countries. The cytokine levels  
4 were reduced during hospitalisation, though the clinical significance of these changes within the normal range is  
5 uncertain. There was no significant difference in the trends observed between treatment arms.  
6  
7

8 The median baseline levels of CRP were similar in both groups, 28, (IQR 8-71) in SOC+L vs. 34 (14-71) mg/L  
9 in SOC. By one week of treatment, there was similar levels of reduction between groups.  
10  
11

12 The median baseline lymphocytes levels were lower than normal reference range in both groups (0.99 [IQR 0.6-  
13 1.6) x10<sup>9</sup>/L in SOC+L vs 0.95 (IQR 0.6-1.6) x10<sup>9</sup>/L in SOC. By 1 week of treatment, levels rose to normal  
14 range in both groups. There was no significant difference in the trends observed between groups.  
15  
16  
17

### 18 *28- and 90-days follow up*

19  
20 At 28 days, 59/81 patients (71.2%) in the SOC+L group and 60/91 patients (65.9%) in the SOC group  
21 experienced at least 1 of 9 common long-COVID symptoms (fatigue, cough, anxiety, chest pain, brain fog,  
22 breathlessness, disturbed sleep, palpitations, joint pain); with sleep quality (48.2% vs. 38.5%), breathlessness  
23 (40.7 vs 42.9%), joint pain (32.1 vs. 33%), fatigue (29.6 vs, 31.9%), and anxiety (24.7 vs. 19.8%) being the  
24 commonest symptoms experienced (Supplementary table 3). At 90 days, there was a reduction in overall  
25 prevalence of symptoms as 42/81 patients (51.2%) in the SOC+L group and 37/91 (40.7%) patients in the SOC  
26 group and any of the residual symptoms were of reduced severity. There was no significant difference in these  
27 outcomes between the treatment arms.  
28  
29  
30  
31  
32

33 Myalgia symptoms were comparably reduced between the 2 groups at 90 days. Anosmia and loss of taste were  
34 still reported by 2 and 7 patients, respectively, in the SOC+L group, but none in the SOC group.  
35  
36

37 At 28 days, 41.5% patients in the SOC + L group and 52.8% in SOC group, reported being moderately to  
38 severely dyspnoeic (Grade 4: stops for breath after walking 100m; Grade 5: too breathless to leave the house or  
39 breathless when dressing). These proportions were further reduced at 90 days, to 22% in the SOC+L group  
40 compared to 19.8% in SOC group. These differences were not significant in between group comparisons.  
41  
42  
43

44 Mental health issues were highlighted by reports of feeling depressed and losing interest in doing things.  
45 Comparable proportions of patients in the SOC+L group and SOC group reported those problems at 28 days  
46 (17.9% vs 16.0%; 11.6% vs 14.2%, respectively) which were further reduced in both groups at 90 days (11.6%  
47 vs 9.4%; 9.5% vs 6.6%, respectively).  
48  
49  
50

51 At 28 days participants in the SOC+L group scored their current health as being 80±25% of the usual which  
52 increased to 89±17% at 90 days. In the SOC group the scores were similar, 82 ± 23% and 90 ± 17% at 28 and  
53 90 days respectively.  
54  
55  
56  
57  
58  
59  
60



## Discussion

This study is the first prospective, multicentre, randomised, controlled clinical trial investigating the clinical efficacy and safety of leflunomide in treating acute COVID-19 infection. The study showed that a course of leflunomide (3 days of 100mg/day loading dose followed by 7 days of 20 mg/day maintenance dose) added to the standard care treatment (steroids, anticoagulants, antibiotics and antiviral therapy), did not influence the primary outcome of the trial and the acute clinical outcomes at 28 days, or the prevalence of long-COVID symptoms at 28 and 90 days. However, participants who received leflunomide as an adjunct therapy were weaned off oxygen earlier, which translated to reduced hospital stay by one day. The medication appeared to be safe and well tolerated with no severe adverse events attributable to it. A small proportion of patients in our study were still burdened by COVID-19 related symptoms 90 days after randomisation.

This multicentre trial advances the evidence base on the impact of leflunomide, a repurposed rheumatoid arthritis medication, on COVID-19 infection. Leflunomide was a potentially attractive therapeutic choice from early preclinical and clinical experience reported from hospitals in Wuhan, China. Dihydroorotate dihydrogenase (DHODH), located in the inner mitochondrial membrane is a rate-limiting enzyme in de novo pyrimidine biosynthesis. In virus-infected cells, a large intracellular nucleotide pool is consumed by rapid viral replication. RNA viruses need unique UMP but not TMP in their genomes. As UMP is the particular nucleoside produced by DHODH, RNA viruses are sensitive to reduced DHODH activity. Preclinical models of cell and animal infection by SARS-CoV-2 demonstrated that leflunomide attenuates viral genome replication, suppresses inflammatory response and the release of pro-inflammatory cytokines and chemokines.<sup>7,8,9</sup> Early reports from China advocated major clinical benefits in patients treated with leflunomide both in terms of less severe outcomes and duration of infection.<sup>15,16,17</sup> While the current study did not reproduce these overall benefits in the ITT analysis regarding the primary outcome, it confirmed some positive effects in those patients who received the trial intervention (in modified intent to treat analysis).

Our results are likely explained by the changing landscape and evolution of the routine COVID-19 treatment protocols in the standard arm of the study and the resultant severity of the COVID-19 outcomes in general. The initial phase of the COVID-19 pandemic was characterised by severe respiratory and systemic infections and poor outcomes due to the development of acute respiratory distress syndrome, multi-organ failure and eventual death.<sup>18,19</sup> Contrary to this early experience with COVID-19 management, the in-hospital mortality in the present study was much lower, less than 10% in both groups. The majority of patients in both treatment arms improved during hospitalisation and were discharged within a week of admission. Inclusion of prognostically significant COVID-19 therapies in both pharmacological and non-pharmacological standard of care treatments undoubtedly contributed to a reduction in severe complications and better overall outcomes. During patient recruitment of the current trial, various therapies have been introduced including more than 95% percent of the study population received steroids as standard of care.

Theoretical considerations suggest that leflunomide may effectively inhibit viral replication. The initial pilot study during the early outbreak of COVID-19 in Wuhan, China reported reduced viral shedding time following

1  
2  
3 leflunomide treatment during acute infection compared to the standard of care therapy.<sup>15</sup> Similarly, viral shedding  
4 duration was reduced in leflunomide treated patients who remained qPCR positive 1 month after the initial  
5 infection.<sup>16</sup> Our study addressed the viral load reduction at pre-specified time points. Values of viral load were  
6 reduced over time but there was no difference between the treatment arms. Both methodological considerations  
7 and the inclusion of comprehensive pharmacological treatment regimens in the SOC could explain these  
8 differences. For instance, corticosteroid therapy was absent in the early study from Wuhan, but the later study  
9 refers to the use of hydroxychloroquine, interferon-alpha and antiviral medications as part of acute standard of  
10 care therapy.<sup>15,16</sup> However, our results are in line with other reports from China which showed that duration of  
11 viral shedding was not affected by leflunomide added to nebulised interferon alpha therapy for treating long-term  
12 positive COVID-19 after 4 weeks of in-hospital treatment.<sup>17</sup> Interestingly a third of these patients received  
13 corticosteroid therapy during the initial acute treatment.<sup>16,17</sup>  
14  
15  
16  
17  
18  
19

20 Beyond the issue of therapeutic efficacy and viral load, our study confirms overall safety of leflunomide in  
21 COVID-19 infection. The safety profile of leflunomide is well established in the treatment of RA.<sup>6</sup> Leflunomide,  
22 repurposed for the COVID-19 treatment, was well tolerated since no serious adverse events were attributed to it.  
23 Similar findings were reported in other studies.<sup>15,16,24</sup> Mild transaminitis following long-term leflunomide use in  
24 the RA population is recognised, and usually resolves after medication is terminated. The mechanism is likely to  
25 be modulation of interleukins which may hinder the protection of hepatocytes from injury rather than direct  
26 toxicity.<sup>25</sup> There were comparable incidences of transaminitis in both treatment arms in our study. However, more  
27 patients in the UK cohort had raised liver function tests leading to modification or termination of leflunomide  
28 treatment. This may be accounted for by the difference in the severity of COVID-19 disease and spectrum of co-  
29 morbidities between UK and Indian participants rather than genetic polymorphism in drug metabolism. Overall,  
30 the proposed leflunomide regimen was well tolerated.  
31  
32  
33  
34  
35  
36

37 One of the motivations of the current trial employing leflunomide was to benefit from the anti-inflammatory  
38 effects of this drug. In this context, hydrocortisone has been demonstrated as an effective therapy in severe  
39 COVID-19 infections and recent trials also demonstrated the benefit of tocilizumab, a selective IL-6 inhibitor and  
40 a different disease modifying rheumatoid arthritis medication. However, such finding is not universal as the  
41 benefit of tocilizumab is mainly demonstrated in critically to moderately ill patients.<sup>20,21</sup> A recent meta-analysis  
42 showed that the benefit of IL-6 receptor antagonist was encountered only in patients who were also treated with  
43 glucocorticoids.<sup>23</sup> This is in keeping with observations that a broader spectrum of pro-inflammatory cytokines,  
44 macrophages and T cell response have all been documented in severely ill patients demonstrating the role of a  
45 more complex inflammatory response. It is exactly this broader inflammatory reaction that could be targeted by  
46 leflunomide as its effect on cytokines is not restricted to IL 6 and it may also have an impact on activated T cell  
47 response.<sup>8,9,22</sup> Such phenomena might contribute to the benefits of reduced oxygen dependence in patients who  
48 have received leflunomide treatment. However, it is conceivable that the full benefit of such anti-inflammatory  
49 effect may be more pronounced in severely ill patients, but this population was underrepresented in our trial and  
50 the (inadvertent) inclusion of patients with milder symptoms may have lead to some attrition of statistical power  
51 in our study. A more detailed analysis of the cytokine and metabolic profiles of our trial population is underway  
52 to clarify these important issues.  
53  
54  
55  
56  
57  
58  
59  
60

1  
2  
3  
4  
5  
6  
7  
8  
9  
10  
11  
12  
13  
14  
15  
16  
17  
18  
19  
20  
21  
22  
23  
24  
25  
26  
27  
28  
29  
30  
31  
32  
33  
34  
35  
36  
37  
38  
39  
40  
41  
42  
43  
44  
45  
46  
47  
48  
49  
50  
51  
52  
53  
54  
55  
56  
57  
58  
59  
60

Another important consideration when discussing the potential benefits of leflunomide is the mutation ability of the SARS-CoV-2 virus.<sup>26</sup> So far, the mutations observed in different strains worldwide have largely been confined to the part of the spike protein affecting the virus's ability of cell entry as opposed to a region targeted by neutralising antibodies. However, the possibility of mutations in different regions cannot be excluded. Targeting the host's pyrimidine biosynthesis pathway by leflunomide, rather than using drugs with direct antiviral action, remains an advantage offering protection against a broader spectrum of viruses and potentially overcoming resistance. Indeed, DHODH inhibitors such as leflunomide has shown broad-spectrum antiviral effects against various RNA viruses in cell models.<sup>7</sup> Leflunomide may therefore be considered a viable pharmacological treatment for COVID-19 patients given it is well tolerated, safe, economical, and widely available. Its clinical effectiveness measured against recognised selective IL-6 inhibitors in the more severely/critically ill patients needs to be further explored as leflunomide may be the preferred option in countries where other immunomodulating agents, such as Talizumab, may not be practical or widely available.

### Limitations

The present study has several limitations. The trial was not blinded, so the data collection and clinical management of the patients may have been affected. The study was set out to recruit more severely and critically affected patients in a single country. However, due to recruitment restrictions because of national prioritization of critically ill patients to only a few studies together with scarcity of NHS resources during the pandemic, the study was extended abroad, ultimately recruiting less affected patients with heterogeneous clinical profiles. Although patient characteristics and medications received as part of SOC did not differ between the randomised arms, the more heterogeneous population, milder COVID-19 disease, and more effective standard of care treatments most likely impacted on the hypothesised effect size and the ability of finding a difference in our recruited sample. Finally, the COVID-19 restrictions affected our protocolised laboratory investigations, such as the serial viral load and comprehensive inflammatory profiling. Nevertheless, studies focusing on the more severely affected participants are underway and will be the subject of a separate submission.

### Conclusion

Leflunomide had no major impact on the clinical outcomes when administered together with the currently established but evolving therapies in moderately affected COVID-19 patients. It may shorten duration of oxygen dependence thereby affecting the TTCI and hospital discharge. Transaminitis associated with leflunomide therapy did not lead to excess adverse events compared to the control group and may have arisen in part due to the severity of clinical infection. Further studies are needed to investigate the potential benefits of leflunomide in the critically ill patients and the biological mechanisms involved.

### Ethics statements

1  
2  
3 All patients taking part in the study signed written informed consent form once the study was ethically approved  
4 by relevant bodies in England (South Central - Berkshire Research Ethics Committee, Bristol REC Centre,  
5 reference number 20/SC/0264) and India (Max HealthCare Ethics Committee, reference number  
6 RS/MSSSH/GMHRCCMS/MHEC/CCM/20-23; Meditrina Institute Ethics Committee, reference number  
7 ECR/605/Inst/MH/2014/RR; Noble Hospital Institutional Ethics Committee, reference number  
8 NHIEC/FEB/2021/238).

### 12 **Data availability statement**

13  
14  
15 The anonymized data may be available upon request following approval from the Trial Management Group and the  
16 Sponsor.

### 17 **Acknowledgments**

18 We are grateful to all the patients who took part in the study and contributed their data to our research. We also  
19 thank their clinical care teams who helped with data collection. We are grateful for the support from medical  
20 research charity LifeArc as part of its initiatives to address the need for new therapies against COVID-19 against  
21 the backdrop of world pandemic.

22 We would like to acknowledge the vital roles of the following:

23  
24  
25 **Data Monitoring Committee:** David Morgan (Chair), Lajos Szentgyorgyi, Yee Cheah

26  
27  
28 **Trial Steering Committee:** Brendan Madden (Chair), Patrick Yong, Sreenivasa Rao Kondapally Seshasai, Matt  
29 Mendes, Janice Rodrigues-Mendes, Rod Hughes, Sharanpal Jeetle, Subash Somalanka

30  
31  
32 **Clinical Research Organisation:** Innovate Research CRO in India helped with site and patient recruitment,  
33 project management, monitoring & data collation: Devesh Kumar (Director), Piyush Kumar Pandey (Head  
34 Clinical Operations), Shaitan Singh (Assistant Project Manager), Charanpreet Arora (Clinical research  
35 associate)

### 36 **DEFEAT COVID Investigators:**

37  
38 Ashford and St Peter's Hospital NHS Foundation Trust, Ashford, UK: Shashank Sharma, Megan McGee,  
39 Kieran Brack, Maia Aquino, Rita Pereira, Vicky Frost, Kirsty, Gibson, Maria Croft, Fatima Omar, Kapila  
40 Ranasinghe,

41  
42 Kingston Hospital NHS Foundation Trust, Kingston upon Thames, UK: Siva Mahendran, Anna Joseph, Maggie  
43 Grout

44  
45 Max Hospital, New Delhi India: Arun Dewan, Ritesh Aggarwal

46  
47 Meditrina Institute, Nagpur, India: Ajay Bulle

48  
49 Noble Hospital, Pune, India: Aparna Kodre

### 50 **Authors' contributions**

51 All designated authors meet all four ICMJE criteria for authorship. The funders and the sponsor of the study had  
52 no role in the analyses or the interpretation of the results.

### 53 **Competing interests**

54 All authors have completed the ICMJE uniform disclosure form at [www.icmje.org/disclosure-of-interest/](http://www.icmje.org/disclosure-of-interest/) and  
55 declare no competing interests.

**Dissemination**

A summary of the results will be disseminated to the participants by principal investigators at each trial site via a newsletter.

**Licensing Statement**

The Submitting Author has the right to grant and does grant on behalf of all authors of the Work (as defined in the author licence), an exclusive licence and/or a non-exclusive licence for contributions from authors who are: i) UK Crown employees; ii) where BMJ has agreed a CC-BY licence shall apply, and/or iii) in accordance with the terms applicable for US Federal Government officers or employees acting as part of their official duties; on a worldwide, perpetual, irrevocable, royalty-free basis to BMJ Publishing Group Ltd ("BMJ") its licensees.

**Funding**

This work was supported by LifeArc, a UK registered charity number 1015243 (Grant number not applicable).

## References

1. <https://COVID19.who.int/>
2. Chen YL, Quach TTT, COVID-19 cytokine storm syndrome: a threshold concept. *Lancet Microbe*. 2021 Feb;2(2):e49-e50.doi: 10.1016/S2666-5247(20)30223-8.Epub 2021 Feb 2
3. Gavriatopoulou M, Ntanasis-Stathopoulos I, Korompoki E, Fotiou D, Migkou M, Tzanninis IG, Psaltopoulou T, Kastritis E, Terpos E, Dimopoulos MA. Emerging treatment strategies for COVID-19 infection. *Clin Exp Med*. 2021 May;21(2):167-179. doi: 10.1007/s10238-020-00671-y. Epub 2020 Oct 30. PMID: 33128197; PMCID: PMC759894
4. Dwek, Raymond A et al. "Targeting glycosylation as a therapeutic approach." *Nature reviews. Drug discovery* vol. 1,1 (2002): 65-75. doi:10.1038/nrd708
5. Angus, Derek C et al. "The REMAP-CAP (Randomized Embedded Multifactorial Adaptive Platform for Community-acquired Pneumonia) Study. Rationale and Design." *Annals of the American Thoracic Society* vol. 17,7 (2020): 879-891. doi:10.1513/AnnalsATS.202003-192SD
6. Alfaro-Lara, et al. Systematic review and meta-analysis of the efficacy and safety of leflunomide and methotrexate in the treatment of rheumatoid arthritis. *Reumatol Clin*. 2019 May - Jun;15(3):133-1
7. Xiong R, Zhang L, Li S, Sun Y, Ding M, Wang Y, Zhao Y, Wu Y, Shang W, Jiang X, Shan J, Shen Z, Tong Y, Xu L, Chen Y, Liu Y, Zou G, Lavillete D, Zhao Z, Wang R, Zhu L, Xiao G, Lan K, Li H, Xu K. Novel and potent inhibitors targeting DHODH are broad-spectrum antivirals against RNA viruses including newly-emerged coronavirus SARS-CoV-2. *Protein Cell*. 2020 Oct;11(10):723-739. doi: 10.1007/s13238-020-00768-w. Epub 2020 Aug 4. Erratum in: *Protein Cell*. 2021 Jan;12(1):76-80. Erratum in: *Protein Cell*. 2020 Nov 9;: PMID: 32754890; PMCID: PMC7402641.
8. Yao, H. W.; Li, J.; Chen, J. Q.; Xu, S. Y. A 771726, the active metabolite of leflunomide, inhibits TNF- $\alpha$  and IL-1 from Kupffer cells. *Inflammation* 2004, 28 (2), 97-103.
9. Li, L. et al. The effects of teriflunomide on lymphocyte subpopulations in human peripheral blood mononuclear cells in vitro. *J. Neuroimmunol*. 2013, 265 (1-2), 82-90.
10. <https://www.rcplondon.ac.uk/projects/outputs/national-early-warning-score-news-2>
11. [https://ctep.cancer.gov/protocoldevelopment/electronic\\_applications/ctc.htm#ctc\\_60](https://ctep.cancer.gov/protocoldevelopment/electronic_applications/ctc.htm#ctc_60)
12. Mandal S, Barnett J, Brill SE ARC Study Group, et al. 'Long-COVID': a cross-sectional study of persisting symptoms, biomarker and imaging abnormalities following hospitalisation for COVID-19. *Thorax* 2021;76:396-398.
13. <http://www.who.int/blueprint/priority-diseases/key-action/novel-coronavirus/en/>.
14. Machin D, Campbell M, Fayers, P, Pinol A (1997) *Sample Size Tables for Clinical Studies*. Second Ed. Blackwell Science IBSN 0-86542-870-0 p. 176-177
15. Hu, Ke et al. "A Small-Scale Medication of Leflunomide as a Treatment of COVID-19 in an Open-Label Blank-Controlled Clinical Trial." *Virologica Sinica* vol. 35,6 (2020): 725-733. doi:10.1007/s12250-020-00258-7
16. Wang, Qiang et al. "Efficacy and Safety of Leflunomide for Refractory COVID-19: A Pilot Study." *Frontiers in pharmacology* vol. 12 581833. 2 Jul. 2021, doi:10.3389/fphar.2021.581833

17. Mengmei Wang, Yang Zhao, Weihua Hu, Dong Zhao, Yunting Zhang, Tao Wang, Zhishui Zheng, Xiaochen Li, Shaolin Zeng, Zhenlian Liu. Treatment of Coronavirus Disease 2019 Patients With Prolonged Postsymptomatic Viral Shedding With Leflunomide: A Single-center Randomized Controlled Clinical Trial. *Clinical Infectious Diseases*, Volume 73, Issue 11, 1 December 2021, Pages e4012–e4019, <https://doi.org/10.1093/cid/ciaa1417>
18. Huang, Chaolin et al. “Clinical features of patients infected with 2019 novel coronavirus in Wuhan, China.” *Lancet* (London, England) vol. 395,10223 (2020): 497-506. doi:10.1016/S0140-6736(20)30183-5
19. ISARIC Clinical Characterisation Group. “COVID-19 symptoms at hospital admission vary with age and sex: ISARIC multinational study.” medRxiv : the preprint server for health sciences 2020.10.26.20219519. 19 Nov. 2020, doi:10.1101/2020.10.26.20219519. Preprint.
20. REMAP-CAP Investigators et al. “Interleukin-6 Receptor Antagonists in Critically Ill Patients with COVID-19.” *The New England journal of medicine* vol. 384,16 (2021): 1491-1502. doi:10.1056/NEJMoa2100433
21. Abani, O., Abbas, A., Abbas, F., Abbas, M., Abbasi, S., Abbass, H., et al. (2021). Tocilizumab in Patients Admitted to Hospital with COVID-19 (RECOVERY): a Randomised, Controlled, Open-Label, Platform Trial. *The Lancet* 397, 1637–1645. doi:10.1016/S0140-6736(21)00676-0
22. Kraan MC, Smeets TJM, van Loon MJ, et al Differential effects of leflunomide and methotrexate on cytokine production in rheumatoid arthritis *Annals of the Rheumatic Diseases* 2004;63:1056-1061.
23. WHO Rapid Evidence Appraisal for COVID-19 Therapies (REACT) Working Group et al. “Association Between Administration of Systemic Corticosteroids and Mortality Among Critically Ill Patients With COVID-19: A Meta-analysis.” *JAMA* vol. 324,13 (2020): 1330-1341. doi:10.1001/jama.2020.17023
24. Chakravarty EF, Sanchez-Yamamoto D, Bush TM. The use of disease modifying antirheumatic drugs in women with rheumatoid arthritis of childbearing age: a survey of practice pattern and pregnancy outcomes. *J Rheumatol.* 2003;30:241–6.
25. Atsushi Ogata, Yasuhiro Kato, Shinji Higa, Kazuyuki Yoshizaki, IL-6 inhibitor for the treatment of rheumatoid arthritis: A comprehensive review, *Modern Rheumatology*, Volume 29, Issue 2, 4 March 2019, Pages 258–267, <https://doi.org/10.1080/14397595.2018.1546357>
26. Wang, Shihang et al. “Molecular evolutionary characteristics of SARS-CoV-2 emerging in the United States.” *Journal of medical virology* vol. 94,1 (2022): 310-317. doi:10.1002/jmv.27331



## Figure legends:

**Figure 1: Randomisation, treatment assignment and follow up of DEFEAT-COVID study participant.**

*\*= immunotherapy included Tocilizumab, Bevacizumab and Interferon alpha and beta.*

**Figure 2: Time to clinical improvement of 2 points on a clinical status scale or discharge prior 28 day in a stratified ITT analysis (primary outcome).**

*Patients who died were censored at the time their death occurred, while all surviving patients who did not reach TICI criteria by day 28 were right censored at that point. Most of the patients were discharged within the first 10 days of admission.*

**Figure 3: Cumulative all-cause mortality (A), oxygen dependence (B) by 28 days**

**Figure 4: Mean changes in log viral load from baseline.**

*Error bars represent standard error. Numbers in the bars represent the number of samples available for measurements.*



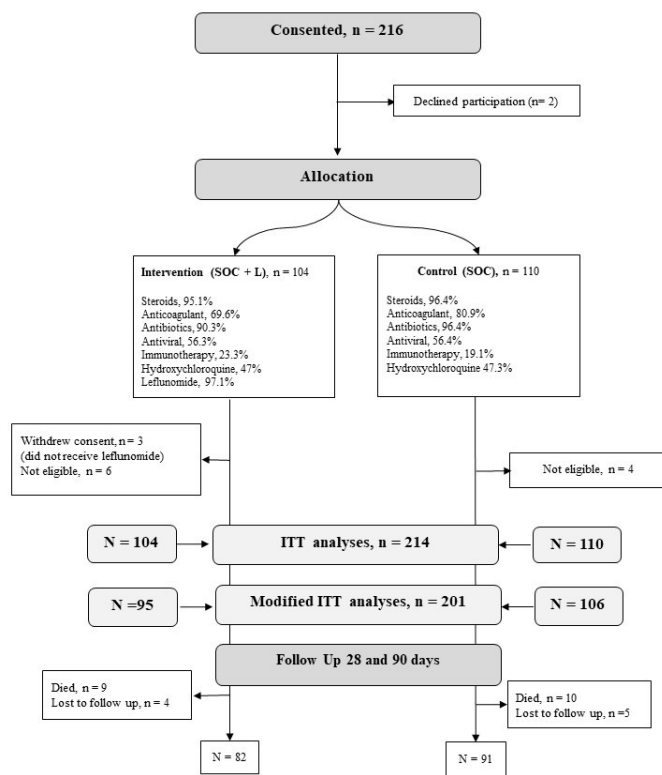

Randomisation, treatment assignment and follow up of DEFEAT-COVID study participant.  
 \*= immunotherapy included Tocilizumab, Bevacizumab and Interferon alpha and beta.

190x338mm (96 x 96 DPI)

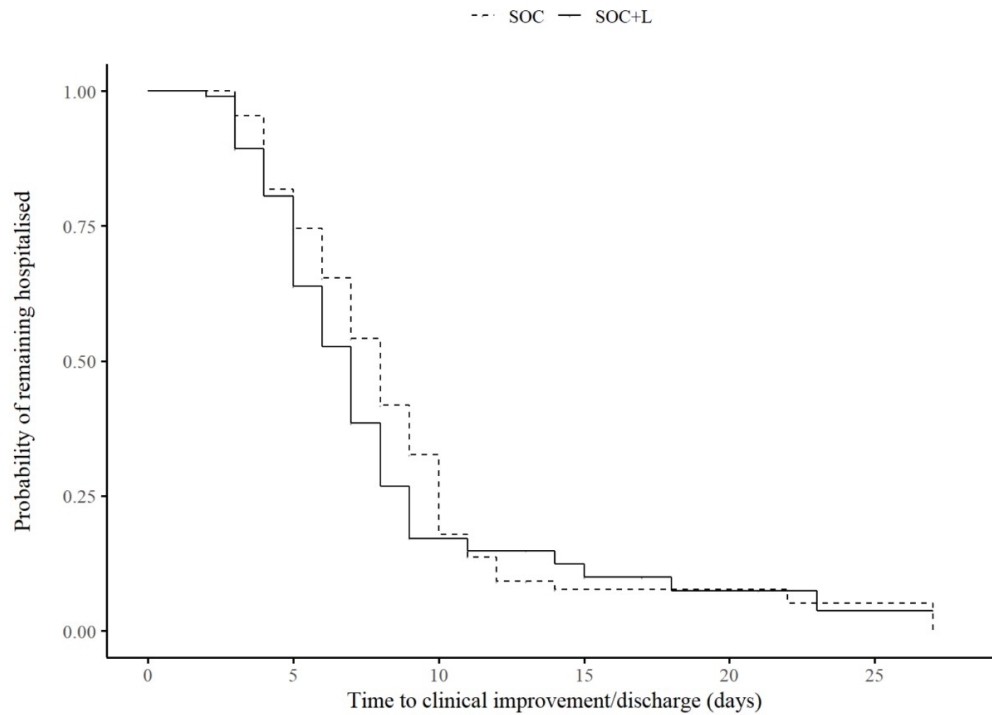

|       |     |    |    |    |   |   |
|-------|-----|----|----|----|---|---|
| SOC   | 110 | 90 | 31 | 4  | 3 | 1 |
| SOC+L | 104 | 82 | 15 | 10 | 3 | 1 |

Time to clinical improvement of 2 points on a clinical status scale or discharge prior 28 day in a stratified ITT analysis (primary outcome).

Patients who died were censored at the time their death occurred, while all surviving patients who did not reach TICI criteria by day 28 were right censored at that point. Most of the patients were discharged within the first 10 days of admission.

139x116mm (220 x 220 DPI)

1  
2  
3  
4  
5  
6  
7  
8  
9  
10  
11  
12  
13  
14  
15  
16  
17  
18  
19  
20  
21  
22  
23  
24  
25  
26  
27  
28  
29  
30  
31  
32  
33  
34  
35  
36  
37  
38  
39  
40  
41  
42  
43  
44  
45  
46  
47  
48  
49  
50  
51  
52  
53  
54  
55  
56  
57  
58  
59  
60

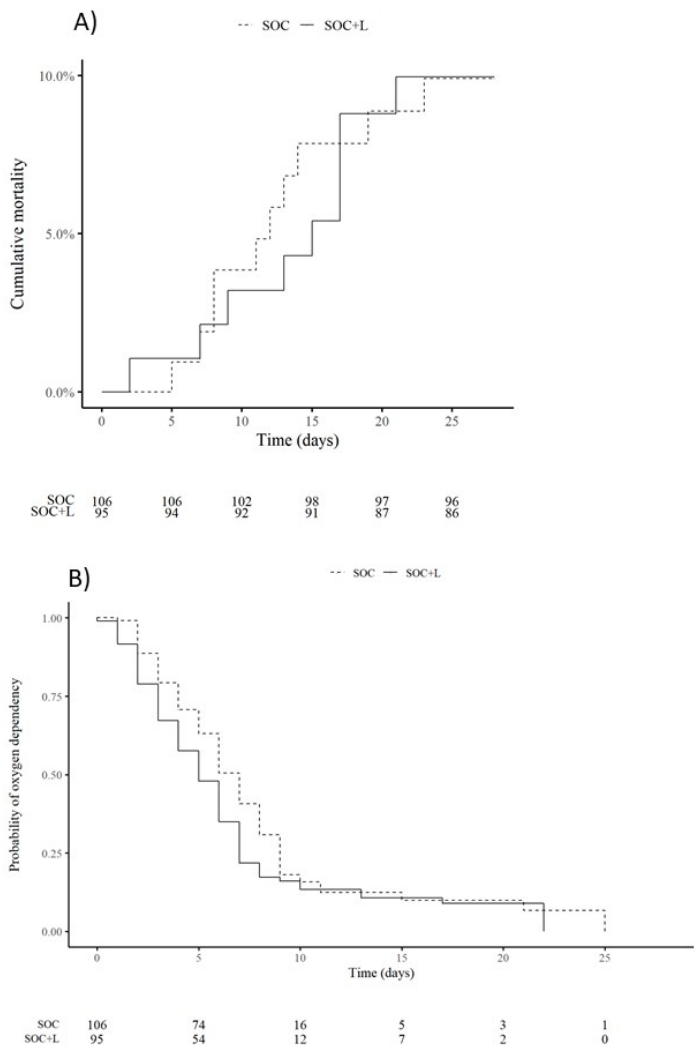

Cumulative all-cause mortality (A), oxygen dependence (B) by 28 days  
190x275mm (96 x 96 DPI)

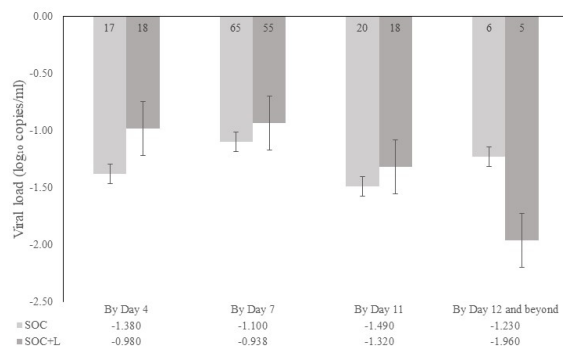

Mean changes in log viral load from baseline.  
 Error bars represent standard error. Numbers in the bars represent the number of samples available for measurements.

338x190mm (96 x 96 DPI)

1  
2  
3  
4  
5  
6  
7  
8  
9  
10  
11  
12  
13  
14  
15  
16  
17  
18  
19  
20  
21  
22  
23  
24  
25  
26  
27  
28  
29  
30  
31  
32  
33  
34  
35  
36  
37  
38  
39  
40  
41  
42  
43  
44  
45  
46  
47  
48  
49  
50  
51  
52  
53  
54  
55  
56  
57  
58  
59  
60

| Centre      | Group        | N   | Corticosteroid | Anticoagulant | Antiviral | Antibiotic | Immunotherapy* | Hydroxychloroquine |
|-------------|--------------|-----|----------------|---------------|-----------|------------|----------------|--------------------|
| UK          | Intervention | 30  | 100%           | 97%           | 69%       | 100%       | 14%            | 3%                 |
|             | Control      | 36  | 100%           | 100%          | 81%       | 100%       | 3%             | 3%                 |
| India       | Intervention | 74  | 87%            | 76%           | 70%       | 76%        | 67%            | 93%                |
|             | Control      | 74  | 89%            | 84%           | 70%       | 88%        | 50%            | 94%                |
| All Centres | Intervention | 104 | 95%            | 79%           | 56%       | 90%        | 23%            | 47%                |
|             | Control      | 110 | 96%            | 80%           | 56%       | 96%        | 19%            | 47%                |

**Supplementary Table 1: Standard of care therapy in the UK and India**

*\*The "Immunotherapy" includes tocilizumab, bevacizumab, interferon alpha and beta*

|                                                             |                         | Baseline                  |       | Day 1 – 3/4              |       | Day 4/5 – Discharge      |       |
|-------------------------------------------------------------|-------------------------|---------------------------|-------|--------------------------|-------|--------------------------|-------|
|                                                             |                         | UK                        | India | UK                       | India | UK                       | India |
| <b>ALT</b>                                                  |                         |                           |       |                          |       |                          |       |
| <b>SOC + L</b>                                              | <b>Median (IQR) U/L</b> | 48 (30-60)<br>48 (32-71)  |       | 67 (36-87)<br>59 (37-94) |       | 44 (36-71)<br>62(34-151) |       |
|                                                             | <b>1 - 2 x ULN (n)</b>  | 12                        | 32    | 9                        | 41    | 4                        | 13    |
|                                                             | <b>2 - 3 x ULN (n)</b>  | 1                         | 0     | 3                        | 3     | 2                        | 4     |
|                                                             | <b>&gt; 3 x ULN (n)</b> | 1                         | 0     | 3                        | 5     | 4                        | 1     |
|                                                             | <b>&gt;ULN</b>          | 14                        | 32    | 15                       | 49    | 10                       | 18    |
| <b>SOC</b>                                                  | <b>Median (IQR) U/L</b> | 39 (26-56)<br>40 (27-59)  |       | 44 (34-65)<br>44 (31-63) |       | 41 (35-52)<br>49 (33-63) |       |
|                                                             | <b>1 - 2 x ULN (n)</b>  | 13                        | 20    | 8                        | 21    | 7                        | 17    |
|                                                             | <b>2 - 3 x ULN (n)</b>  | 0                         | 0     | 2                        | 7     | 2                        | 1     |
|                                                             | <b>&gt;3 x ULN (n)</b>  | 0                         | 0     | 0                        | 0     | 0                        | 0     |
|                                                             | <b>&gt;ULN</b>          | 13                        | 20    | 10                       | 28    | 9                        | 18    |
| <b>p value of abnormal ALT counts between SOC+L and SOC</b> |                         | <b>0.049</b>              |       | <b>&lt;0.001</b>         |       | <b>0.633</b>             |       |
| <b>AST</b>                                                  |                         |                           |       |                          |       |                          |       |
| <b>SOC + L</b>                                              | <b>Median (IQR) U/L</b> | 44 (30-54)<br>60 (42-102) |       | 55(31-77)<br>58 (42-104) |       | 41(27-50)<br>54 (29-102) |       |
|                                                             | <b>1 - 2 x ULN (n)</b>  | 4                         | 24    | 8                        | 28    | 3                        | 15    |
|                                                             | <b>2 - 3 x ULN (n)</b>  | 2                         | 0     | 2                        | 7     | 1                        | 0     |
|                                                             | <b>&gt; 3 x ULN (n)</b> | 1                         | 0     | 2                        | 4     | 1                        | 0     |
|                                                             | <b>&gt;ULN</b>          | 7                         | 24    | 12                       | 39    | 5                        | 15    |
| <b>SOC</b>                                                  | <b>Median (IQR) U/L</b> | 39 (28-52)<br>57 (34-75)  |       | 39 (29-54)<br>45(38-55)  |       | 37(27-47)<br>45 (35-61)  |       |
|                                                             | <b>1 - 2 x ULN (n)</b>  | 6                         | 16    | 4                        | 14    | 4                        | 12    |
|                                                             | <b>2 - 3 x ULN (n)</b>  | 2                         | 0     | 0                        | 5     | 0                        | 0     |
|                                                             | <b>&gt;3 x ULN (n)</b>  | 0                         | 0     | 0                        | 1     | 1                        | 0     |
|                                                             | <b>&gt;ULN</b>          | 8                         | 16    | 4                        | 20    | 5                        | 12    |
| <b>p value of abnormal ALT counts between SOC+L and SOC</b> |                         | <b>0.3222</b>             |       | <b>&lt;0.001</b>         |       | <b>0.318</b>             |       |

**Supplementary Table 2: Liver enzymes measurements**

ULN: upper limits of normal (ALT: 10-49 U/L; AST 19 – 48U/L). ALT: alanine transaminase. AST: aspartate transaminase; SOC + L: n = 30 UK, 74 India; SOC: n = 36 UK, 74 India

1  
2  
3  
4  
5  
6  
7  
8  
9  
10  
11  
12  
13  
14  
15  
16  
17  
18  
19  
20  
21  
22  
23  
24  
25  
26  
27  
28  
29  
30  
31  
32  
33  
34  
35  
36  
37  
38  
39  
40  
41  
42  
43  
44  
45  
46  
47  
48  
49  
50  
51  
52  
53  
54  
55  
56  
57  
58  
59  
60

|                           | Day 28          |                 |               |                 |       | Day 90          |                 |               |                 |    |
|---------------------------|-----------------|-----------------|---------------|-----------------|-------|-----------------|-----------------|---------------|-----------------|----|
|                           | SOC+L<br>(n=81) |                 | SOC<br>(n=91) |                 | p*    | SOC+L<br>(n=81) |                 | SOC<br>(n=91) |                 | p* |
|                           | %               | Median<br>(IQR) | %             | Median (IQR)    |       | %               | Median (IQR)    | %             | Median (IQR)    |    |
| <b>Fatigue</b>            | 29.6            | 5.00(2.75-8.00) | 31.9          | 5.00(3.00-8.00) | 0.751 | 22.2            | 5.00(3.25-7.00) | 26.4          | 3.00(2.00-4.25) | NS |
| <b>Cough</b>              | 13.6            | 2.00(1.00-4.50) | 18.7          | 2.00(1.00-4.00) | 0.366 | 7.41            | 1.00(1.00-6.25) | 8.79          | 2.50(1.00-3.50) | NS |
| <b>Anxiety</b>            | 24.7            | 3.50(2.00-7.25) | 19.8          | 4.00(3.00-7.75) | 0.438 | 21.0            | 3.00(1.00-5.00) | 19.8          | 2.00(1.00-3.75) | NS |
| <b>Chest pains</b>        | 11.1            | 4.00(2.00-7.00) | 8.79          | 4.00(2.50-5.00) | 0.611 | 7.41            | 4.00(3.25-7.75) | 6.59          | 3.00(1.25-7.75) | NS |
| <b>Brain fog</b>          | 14.8            | 5.00(3.75-7.25) | 16.5          | 5.00(1.50-7.00) | 0.764 | 14.8            | 3.50(1.75-5.00) | 12.1          | 4.00(2.50-4.50) | NS |
| <b>Breathlessness</b>     | 40.7            | 2.00(1.00-6.00) | 42.9          | 1.00(1.00-7.00) | 0.779 | 22.2            | 5.00(1.00-7.00) | 20.9          | 4.00(2.00-4.00) | NS |
| <b>Sleep quality</b>      | 48.2            | 2.00(1.00-5.00) | 38.5          | 3.00(1.00-6.00) | 0.200 | 34.6            | 2.00(1.00-4.25) | 33.0          | 2.50(1.00-5.75) | NS |
| <b>Palpitations</b>       | 8.64            | 7.00(1.50-9.00) | 5.49          | 1.00(1.00-7.00) | 0.419 | 4.94            | 4.50(3.50-5.00) | 3.30          | 1.00(1.00-4.00) | NS |
| <b>Joint pain</b>         | 32.1            | 3.00(1.00-4.75) | 33.0          | 2.00(1.00-4.00) | 0.903 | 22.2            | 3.50(2.00-7.00) | 19.8          | 2.00(2.00-4.50) | NS |
| <b>Myalgia</b>            | 18.5            | -               | 19.8          |                 | 0.834 | 17.3            |                 | 11.0          |                 | NS |
| <b>Anosmia</b>            | 6.17            | -               | 11.0          |                 | 0.264 | 2.47            |                 | -             |                 | -  |
| <b>Loss of taste</b>      | 9.88            | -               | 14.3          |                 | 0.378 | 7.41            |                 | -             |                 | -  |
| <b>Depression</b>         | 19.8            | 1.50(1.00-3.00) | 18.7          | 1.00(1.00-2.00) | 0.859 | 11.1            | 1.00(1.00-1.00) | 11.0          | 1.00(1.00-2.00) | NS |
| <b>Loss of interest</b>   | 12.4            | 2.50(1.25-3.00) | 16.5          | 1.00(1.00-3.00) | 0.442 | 9.88            | 1.00(1.00-1.25) | 7.69          | 1.00(1.00-2.50) | NS |
| <b>Dyspnoea; Mild (1)</b> | 59.3            | 1.00(1.00-2.00) | 47.3          | 2.00(1.00-2.00) | 0.155 | 80.3            | 1.00(1.00-1.00) | 81.3          | 1.00(1.00-1.00) | NS |
| <b>Moderate (2-3)</b>     | 29.6            |                 | 39.6          |                 | 0.173 | 14.8            |                 | 17.6          |                 |    |
| <b>Severe (4-5)</b>       | 11.1            |                 | 13.2          |                 | 0.678 | 4.94            |                 | 1.10          |                 |    |

### Supplementary Table 3: Long COVID symptoms at 28 and 90 days after randomisation

*p*: alpha value. Statistical significance was assumed at 0.05 alpha value. To best summarise the data, symptom scales (e.g. 0-10) for all symptoms (except dyspnoea, which was measured in different terms) were binarized, accepting any score above 0 as prevalence (%) of experiencing that symptom. To reflect magnitude of symptom severity, median (IQR) of individual symptom scores (except for dyspnoea, myalgia, anosmia and loss of taste) were taken excluding scores of 0. For dyspnoea, prevalence (%) of the symptom was determined as the proportion of patients scoring any relevant category (e.g., mild, moderate, severe), and median (IQR) of symptom severity included all score values. Between-group differences at each point of follow-up (day 28 and day 90) for all symptoms were evaluated using patient proportions from the binarized symptom scales via the chi-square test of differences. The Shapiro-wilk test was used to assess statistical normality. No analysis was enabled for any day reporting  $n \leq 3$  datapoints per group for statistical reliability

| Trial procedures                                                                                         | Screening | Day 0/1 (BL) | Daily          | Day 3          | Day 7 | Day 11 +/- 1 | Day 15 +/- 1 | Day 28 +/- 1   | DC             | Day 90 +/- 7   |
|----------------------------------------------------------------------------------------------------------|-----------|--------------|----------------|----------------|-------|--------------|--------------|----------------|----------------|----------------|
| Confirmation of COVID Infection and severity                                                             | X         |              |                |                |       |              |              |                |                |                |
| Informed consent & Eligibility Assessment                                                                | X         |              |                |                |       |              |              |                |                |                |
| Demographics, Medical Hx, Cardiopulmonary Assessment (including ECG <sup>1</sup> & Echo <sup>2</sup> )   | X         |              |                |                |       |              |              |                |                |                |
| Concomitant medication                                                                                   |           | X            | X              |                |       |              |              | X <sup>7</sup> |                | X              |
| Bloods – FBC, U&Es, LFT (AST <sup>6</sup> & ALT <sup>6</sup> )                                           |           | X            | X <sup>5</sup> | X <sup>6</sup> |       |              |              |                | X              |                |
| – Clotting screen, Fibrinogen, D-Dimer, Ferritin                                                         |           | X            | X <sup>5</sup> |                |       |              |              |                |                |                |
| – Glucose                                                                                                |           | X            | X <sup>5</sup> |                |       |              |              |                |                |                |
| – Creatine Kinase, Troponin, BNP (NT-proBNP)                                                             |           | X            | X <sup>5</sup> |                |       |              |              |                |                |                |
| – Procalcitonin, CRP, LDH                                                                                |           | X            | X <sup>5</sup> | X              |       | X            |              |                |                |                |
| – HIV                                                                                                    |           | X            |                |                |       |              |              |                |                |                |
| – Cytokine profile                                                                                       |           | X            |                | X              |       | X            |              |                | X <sup>8</sup> |                |
| Pregnancy test (urine sample)                                                                            |           | X            |                |                |       |              |              |                |                |                |
| Viral Load (nasopharyngeal swab)                                                                         |           | X            |                |                | X     | X            | X            | X              | X <sup>8</sup> |                |
| Randomisation                                                                                            |           | X            |                |                |       |              |              |                |                |                |
| IMP dispense, loading (daily from Day 0/1 to 3) / maintenance dose (daily from Day 4 to 10) <sup>3</sup> |           | X            |                |                |       |              |              |                |                |                |
| Primary outcome assessment (TTCI)                                                                        |           | X            | X              |                |       |              |              | X <sup>7</sup> |                |                |
| Clinical Assessment, e.g. NEWS 2, body T°C*, vital signs, imaging**                                      | X         | X            | X <sup>5</sup> |                |       |              |              |                |                |                |
| *Blood and Urine cultures (in presence of fever)                                                         |           | X            | X <sup>5</sup> |                |       |              |              |                |                |                |
| **Urine for legionella and pneumococcal                                                                  |           | X            | X <sup>5</sup> |                |       |              |              |                |                |                |
| Oxygenation assessment e.g. O <sub>2</sub> delivery method and level [SpO <sub>2</sub> ]                 |           | X            | X <sup>5</sup> |                |       |              |              |                |                |                |
| Arterial Blood Gas (ABG) – as available and where applicable                                             |           | X            | X <sup>5</sup> |                |       |              |              |                |                |                |
| Serious Adverse Event(s) (SAE(s))/ Adverse Event(s) (AE(s)) <sup>4</sup>                                 |           |              | X              |                |       |              |              | X <sup>7</sup> |                | X <sup>9</sup> |
| Out-patient assessment (telephone call)                                                                  |           |              |                |                |       |              |              | X <sup>7</sup> |                | X              |

### Data collected and study time points

**Key:** BL – Baseline; IMP – Investigation Medicinal Product (trial treatment i.e. trial drug); SOC - Standard of Care; DC Discharge.

**Notes:** **1.** Check medical notes, if abnormal flag repeat imaging; **2.** Echo within 6 months to be used if no cardiac symptoms; **3.** Participant to take home IMP if DC'd; **4.** Participant to self-report events between DC to Day 90; **5.** Completed Daily, depending on clinical need and resources. If participant is DC'd early – record what is available as part of SOC; **6.** AST/ALT *must* be checked for treatment arm to determine maintenance dose; **7.** Participant DC'd called on Day 28 for Treatment Assessments, if not seen on-site; **8.** Cytokines/Viral Load to be collected if outside of scheduled collection. Day 11 is the last collection for Cytokines. on DC Medium (telephone call) and long term (by Sponsor) Treatment Assessments respectively.



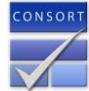

## CONSORT 2010 checklist of information to include when reporting a randomised trial\*

| Section/Topic                    | Item No | Checklist item                                                                                                                                                                              | Reported on page No |
|----------------------------------|---------|---------------------------------------------------------------------------------------------------------------------------------------------------------------------------------------------|---------------------|
| <b>Title and abstract</b>        |         |                                                                                                                                                                                             |                     |
|                                  | 1a      | Identification as a randomised trial in the title                                                                                                                                           | 1                   |
|                                  | 1b      | Structured summary of trial design, methods, results, and conclusions (for specific guidance see CONSORT for abstracts)                                                                     | 2                   |
| <b>Introduction</b>              |         |                                                                                                                                                                                             |                     |
| Background and objectives        | 2a      | Scientific background and explanation of rationale                                                                                                                                          | 4,5,6               |
|                                  | 2b      | Specific objectives or hypotheses                                                                                                                                                           | 5,6                 |
| <b>Methods</b>                   |         |                                                                                                                                                                                             |                     |
| Trial design                     | 3a      | Description of trial design (such as parallel, factorial) including allocation ratio                                                                                                        | 4,5,6               |
|                                  | 3b      | Important changes to methods after trial commencement (such as eligibility criteria), with reasons                                                                                          | NA                  |
| Participants                     | 4a      | Eligibility criteria for participants                                                                                                                                                       | 4                   |
|                                  | 4b      | Settings and locations where the data were collected                                                                                                                                        | 4,5                 |
| Interventions                    | 5       | The interventions for each group with sufficient details to allow replication, including how and when they were actually administered                                                       | 5                   |
| Outcomes                         | 6a      | Completely defined pre-specified primary and secondary outcome measures, including how and when they were assessed                                                                          | 5,6,7               |
|                                  | 6b      | Any changes to trial outcomes after the trial commenced, with reasons                                                                                                                       | NA                  |
| Sample size                      | 7a      | How sample size was determined                                                                                                                                                              | 6                   |
|                                  | 7b      | When applicable, explanation of any interim analyses and stopping guidelines                                                                                                                | NA                  |
| <b>Randomisation:</b>            |         |                                                                                                                                                                                             |                     |
| Sequence generation              | 8a      | Method used to generate the random allocation sequence                                                                                                                                      | 4                   |
|                                  | 8b      | Type of randomisation; details of any restriction (such as blocking and block size)                                                                                                         | 5                   |
| Allocation concealment mechanism | 9       | Mechanism used to implement the random allocation sequence (such as sequentially numbered containers), describing any steps taken to conceal the sequence until interventions were assigned | NA                  |
| Implementation                   | 10      | Who generated the random allocation sequence, who enrolled participants, and who assigned participants to interventions                                                                     | 4,5                 |
| Blinding                         | 11a     | If done, who was blinded after assignment to interventions (for example, participants, care providers, those                                                                                | NA                  |

|                                                      |     |                                                                                                                                                   |                  |
|------------------------------------------------------|-----|---------------------------------------------------------------------------------------------------------------------------------------------------|------------------|
|                                                      |     | assessing outcomes) and how                                                                                                                       |                  |
|                                                      | 11b | If relevant, description of the similarity of interventions                                                                                       | NA               |
| Statistical methods                                  | 12a | Statistical methods used to compare groups for primary and secondary outcomes                                                                     | 5,6              |
|                                                      | 12b | Methods for additional analyses, such as subgroup analyses and adjusted analyses                                                                  | 5,6              |
| <b>Results</b>                                       |     |                                                                                                                                                   |                  |
| Participant flow (a diagram is strongly recommended) | 13a | For each group, the numbers of participants who were randomly assigned, received intended treatment, and were analysed for the primary outcome    | Figure 1, page 7 |
|                                                      | 13b | For each group, losses and exclusions after randomisation, together with reasons                                                                  | Figure 1, page 7 |
| Recruitment                                          | 14a | Dates defining the periods of recruitment and follow-up                                                                                           | 7                |
|                                                      | 14b | Why the trial ended or was stopped                                                                                                                | NA               |
| Baseline data                                        | 15  | A table showing baseline demographic and clinical characteristics for each group                                                                  | Table 1          |
| Numbers analysed                                     | 16  | For each group, number of participants (denominator) included in each analysis and whether the analysis was by original assigned groups           | 7, Figure 1      |
| Outcomes and estimation                              | 17a | For each primary and secondary outcome, results for each group, and the estimated effect size and its precision (such as 95% confidence interval) | 5,6              |
|                                                      | 17b | For binary outcomes, presentation of both absolute and relative effect sizes is recommended                                                       | 5,6              |
| Ancillary analyses                                   | 18  | Results of any other analyses performed, including subgroup analyses and adjusted analyses, distinguishing pre-specified from exploratory         | 5,6,7,8,9        |
| Harms                                                | 19  | All important harms or unintended effects in each group (for specific guidance see CONSORT for harms)                                             | NA               |
| <b>Discussion</b>                                    |     |                                                                                                                                                   |                  |
| Limitations                                          | 20  | Trial limitations, addressing sources of potential bias, imprecision, and, if relevant, multiplicity of analyses                                  | 12               |
| Generalisability                                     | 21  | Generalisability (external validity, applicability) of the trial findings                                                                         |                  |
| Interpretation                                       | 22  | Interpretation consistent with results, balancing benefits and harms, and considering other relevant evidence                                     | 13               |
| <b>Other information</b>                             |     |                                                                                                                                                   |                  |
| Registration                                         | 23  | Registration number and name of trial registry                                                                                                    | 2                |
| Protocol                                             | 24  | Where the full trial protocol can be accessed, if available                                                                                       | NA               |
| Funding                                              | 25  | Sources of funding and other support (such as supply of drugs), role of funders                                                                   | 2,13             |

\*We strongly recommend reading this statement in conjunction with the CONSORT 2010 Explanation and Elaboration for important clarifications on all the items. If relevant, we also recommend reading CONSORT extensions for cluster randomised trials, non-inferiority and equivalence trials, non-pharmacological treatments, herbal interventions, and pragmatic trials. Additional extensions are forthcoming: for those and for up to date references relevant to this checklist, see [www.consort-statement.org](http://www.consort-statement.org).

# BMJ Open

## Leflunomide Treatment for Patients Hospitalised with COVID-19: DEFEAT-COVID Randomised Controlled Trial

|                                 |                                                                                                                                                                                                                                                                                                                                                                                                                                                                                                                                                                                                                                                                                                                                                                                                                                                                                                                                                                                                                                                                                                                                                                                                                                                                                              |
|---------------------------------|----------------------------------------------------------------------------------------------------------------------------------------------------------------------------------------------------------------------------------------------------------------------------------------------------------------------------------------------------------------------------------------------------------------------------------------------------------------------------------------------------------------------------------------------------------------------------------------------------------------------------------------------------------------------------------------------------------------------------------------------------------------------------------------------------------------------------------------------------------------------------------------------------------------------------------------------------------------------------------------------------------------------------------------------------------------------------------------------------------------------------------------------------------------------------------------------------------------------------------------------------------------------------------------------|
| Journal:                        | <i>BMJ Open</i>                                                                                                                                                                                                                                                                                                                                                                                                                                                                                                                                                                                                                                                                                                                                                                                                                                                                                                                                                                                                                                                                                                                                                                                                                                                                              |
| Manuscript ID                   | bmjopen-2022-068179.R1                                                                                                                                                                                                                                                                                                                                                                                                                                                                                                                                                                                                                                                                                                                                                                                                                                                                                                                                                                                                                                                                                                                                                                                                                                                                       |
| Article Type:                   | Original research                                                                                                                                                                                                                                                                                                                                                                                                                                                                                                                                                                                                                                                                                                                                                                                                                                                                                                                                                                                                                                                                                                                                                                                                                                                                            |
| Date Submitted by the Author:   | 28-Feb-2023                                                                                                                                                                                                                                                                                                                                                                                                                                                                                                                                                                                                                                                                                                                                                                                                                                                                                                                                                                                                                                                                                                                                                                                                                                                                                  |
| Complete List of Authors:       | Kralj-Hans, Ines; Ashford and Saint Peter's Hospitals NHS Trust, Li, Kuo; Imperial College London<br>Wesek, Adrian; Imperial College London<br>Lamorgese, Alexia; JB Medical Ltd<br>Omar, Fatima; Ashford and Saint Peter's Hospitals NHS Trust<br>Ranasinghe, Kapila; Ashford and Saint Peter's Hospitals NHS Trust<br>McGee, Megan; Ashford and Saint Peter's Hospitals NHS Trust<br>Brack, Kieran; Ashford and Saint Peter's Hospitals NHS Trust<br>Li, Shiliang; East China University of Science and Technology<br>Aggarwal, Ritesh; Max Hospital<br>Bulle, Ajay; Meditrina institute of medical science<br>Kodre, Aparna; Noble Hospital<br>Sharma, Shashank; Ashford and Saint Peter's Hospitals NHS Trust, St Peters Hospital Emergency Department<br>Fluck, David; Ashford and Saint Peter's Hospitals NHS Trust, Cardiology<br>John, Isaac; Ashford and Saint Peter's Hospitals NHS Trust<br>Sharma, Pankaj; Royal Holloway University of London<br>Belsey, Jonathan; JB Medical Ltd<br>Li, Ling; University of Kent<br>Seshasai, Sreenivasa Rao Kondapally; St George's University Hospitals NHS Foundation Trust<br>Li, HongLin; Shanghai Key Laboratory of New Drug Design<br>Marczin, N; Imperial College London<br>Chen, Zhong; Ashford and Saint Peter's Hospitals NHS Trust |
| <b>Primary Subject Heading</b>: | Infectious diseases                                                                                                                                                                                                                                                                                                                                                                                                                                                                                                                                                                                                                                                                                                                                                                                                                                                                                                                                                                                                                                                                                                                                                                                                                                                                          |
| Secondary Subject Heading:      | Respiratory medicine                                                                                                                                                                                                                                                                                                                                                                                                                                                                                                                                                                                                                                                                                                                                                                                                                                                                                                                                                                                                                                                                                                                                                                                                                                                                         |
| Keywords:                       | COVID-19, INFECTIOUS DISEASES, Respiratory infections < THORACIC MEDICINE                                                                                                                                                                                                                                                                                                                                                                                                                                                                                                                                                                                                                                                                                                                                                                                                                                                                                                                                                                                                                                                                                                                                                                                                                    |
|                                 |                                                                                                                                                                                                                                                                                                                                                                                                                                                                                                                                                                                                                                                                                                                                                                                                                                                                                                                                                                                                                                                                                                                                                                                                                                                                                              |

SCHOLARONE™  
Manuscripts

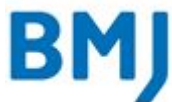

I, the Submitting Author has the right to grant and does grant on behalf of all authors of the Work (as defined in the below author licence), an exclusive licence and/or a non-exclusive licence for contributions from authors who are: i) UK Crown employees; ii) where BMJ has agreed a CC-BY licence shall apply, and/or iii) in accordance with the terms applicable for US Federal Government officers or employees acting as part of their official duties; on a worldwide, perpetual, irrevocable, royalty-free basis to BMJ Publishing Group Ltd ("BMJ") its licensees and where the relevant Journal is co-owned by BMJ to the co-owners of the Journal, to publish the Work in this journal and any other BMJ products and to exploit all rights, as set out in our [licence](#).

The Submitting Author accepts and understands that any supply made under these terms is made by BMJ to the Submitting Author unless you are acting as an employee on behalf of your employer or a postgraduate student of an affiliated institution which is paying any applicable article publishing charge ("APC") for Open Access articles. Where the Submitting Author wishes to make the Work available on an Open Access basis (and intends to pay the relevant APC), the terms of reuse of such Open Access shall be governed by a Creative Commons licence – details of these licences and which [Creative Commons](#) licence will apply to this Work are set out in our licence referred to above.

Other than as permitted in any relevant BMJ Author's Self Archiving Policies, I confirm this Work has not been accepted for publication elsewhere, is not being considered for publication elsewhere and does not duplicate material already published. I confirm all authors consent to publication of this Work and authorise the granting of this licence.

1  
2  
3 **Leflunomide Treatment for Patients Hospitalised with COVID-19: DEFEAT-COVID Randomised**  
4 **Controlled Trial**  
5

6  
7 Authors:

8 Ines Kralj-Hans<sup>1</sup>, Kuo Li<sup>2</sup>, Adrian Wesek<sup>3</sup>, Alexia Lamorgese<sup>4</sup>, Fatima Omar<sup>1</sup>, Kapila Ranasinghe<sup>1</sup>, Megan  
9 McGee<sup>1</sup>, Kieran Brack<sup>1</sup>, Shiliang Li<sup>5</sup>, Ritesh Aggarwal<sup>6</sup>, Ajay Bulle<sup>7</sup>, Aparna Kodre<sup>8</sup>, Shashank Sharma<sup>1</sup>, David  
10 Fluck<sup>1</sup>, Isaac John<sup>1</sup>, Pankaj Sharma<sup>9</sup>, Jonathan Belsey<sup>4</sup>, Ling Li<sup>3</sup>, Sreenivasa Rao Kondapally Seshasai<sup>10</sup>,  
11 \*HongLin Li<sup>5</sup>, \*Nandor Marczin<sup>2</sup>, \*Zhong Chen<sup>1</sup>, on behalf of DEFEAT-COVID Investigators  
12  
13  
14  
15

16  
17 \*Joint senior authors  
18

19 Affiliations:

- 20 1. Ashford and St Peter's Hospital NHS Foundation Trust, UK  
21 2. Faculty of Medicine, Imperial College London, UK  
22 3. University of Kent, UK  
23 4. JB Medical, UK  
24 5. Shanghai Key Laboratory of New Drug Design, School of Pharmacy, East China University of Science and  
25 Technology, China  
26 6. Max Hospital, New Delhi, India  
27 7. Meditrina institute of medical science, Nagpur, India  
28 8. Noble Hospital, Pune, India  
29 9. Institute of cardiovascular research, Royal Holloway, University of London, UK  
30 10. St George's University Hospitals NHS Foundation Trust, UK  
31  
32  
33  
34  
35  
36  
37

38 Corresponding author: Dr Ines Kralj-Hans, [i.kralj-hans@nhs.net](mailto:i.kralj-hans@nhs.net)

39 Ashford and St Peter's Hospital NHS Foundation Trust, Guildford Street, Chertsey, KT16 0PZ, UK  
40  
41  
42  
43  
44  
45  
46  
47  
48  
49  
50  
51  
52  
53  
54  
55  
56  
57  
58  
59  
60

**Abstract**

Objective: To evaluate the clinical efficacy and safety of leflunomide (L) added to the standard of care (SOC) treatment in COVID-19 patients hospitalised with moderate/critical clinical symptoms.

Design: Prospective, open-label, multicentre, stratified, randomised clinical trial.

Setting: Five hospitals in United Kingdom and India, from September 2020 to May 2021.

Participants: Adults with polymerase-chain-reaction (PCR) confirmed COVID-19 infection with moderate/critical symptoms within 15-days of onset.

Intervention: Leflunomide 100 mg/day (3-days) followed by 10-20 mg/day (7-days) added to standard care.

Primary outcomes: The time to clinical improvement (TTCI) defined as two-point reduction on a clinical status scale or live discharge prior to 28 days; safety profile measured by the incidence of adverse events (AE) within 28 days.

Results: Eligible patients (n=214; age 56.3±14.9 years; 33% female) were randomised to SOC+L (n=104) and SOC group (n=110), stratified according to their clinical risk profile. TTCI was 7 vs. 8 days in SOC+L vs. SOC group (HR 1.317; CI 0.980, 1.768; p=0.070). Incidence of serious adverse events was similar between the groups and none was attributed to leflunomide. In sensitivity analyses, excluding 10 patients not fulfilling the inclusion criteria and 3 who withdrew consent before leflunomide treatment, TTCI was 7 vs. 8 days (HR 1.416, CI 1.041, 1.935; p=0.028), indicating a trend in favour of the intervention group. All-cause mortality rate was similar between groups, 9/104 vs. 10/110. Duration of oxygen dependence was shorter in the SOC+L group being a median 6-days (IQR 4-8) compared to 7-days (IQR 5-10) in SOC group (p=0.047).

Conclusion: Leflunomide, added to the SOC treatment for COVID-19, was safe and well tolerated but had no major impact on clinical outcomes. It may shorten the time of oxygen dependence by one day and thereby improve TTCI /hospital discharge in moderately affected COVID-19 patients.

**Trial registration**

EUDRACT: CTA 21517/0004/001-0001 2020-004994-27

ClinicalTrials.gov: NCT05007678

### Strengths and limitations

- International, prospective, randomised controlled study
- Repurposing a marketed drug with established safety profile and promising dual antiviral and immunomodulating medication based on strong drug discovery data.
- Study participants had milder COVID-19 disease than originally intended, thus eroding the power of the study
- Evolving standard of care therapy possibly diminished measurable benefit of leflunomide

For peer review only

## Introduction

COVID-19 pandemic caused unprecedented strain on health care services around the world. It has affected almost 16 million people globally and caused over 6 million deaths so far.<sup>[1]</sup> Associated clinical syndromes include pneumonia, systemic inflammatory response and cardiovascular complications with high morbidity and mortality. Progressive deterioration is thought to be related to the kinetics of viral replication culminating in a surge of inflammatory mediator release, “cytokine storm”.<sup>[2]</sup> Around 5-10% of infected patients experience severe or life-threatening symptoms with high mortality.<sup>[3]</sup>

Direct-acting and host-targeting antiviral treatments are the two approaches in treating viral infections. Host targeting antiviral treatments may have an advantage over direct antivirals as they enable the body to fight against a broad spectrum of viruses by simultaneously blocking viral replication and overcoming the potential of viral mutagenesis.<sup>[4]</sup> Anti-inflammatory medications have been shown to improve survival through dampening of the inappropriate immune response in susceptible patients.<sup>[5]</sup> This has led to the search for a drug with such therapeutic properties.

Leflunomide is a drug licenced to treat rheumatoid arthritis (RA).<sup>[6]</sup> It is widely available, cost-effective and can be easily administered both in the hospital and domestic settings. In preclinical models of cell and animal infection by SARS-CoV-2, leflunomide was shown to be a potent inhibitor of human dihydroorotate dehydrogenase (DHODH), an enzyme vital to viral replication in the host cell.<sup>[7,8,9]</sup> It has the potential advantage of not only targeting the virus infection but also suppressing the ensuing inflammatory response which may play a role in more progressive stages of infection leading to serious complications.

The DEFEAT-COVID study (Targeting *de novo* pyrimidine biosynthesis by leflunomide for treatment of corona virus disease 2019) tested whether leflunomide added to standard care was clinically effective and safe for COVID-19 moderate/severe symptoms.

## Methods

*Study design* – This was a multicentre, international, open label, prospective, randomised controlled clinical trial set up at 5 hospitals (two in UK and three in India). The recruitment took place between September 2020 and May 2021, and was approved by all relevant ethics committees.

*Participants* - Patients aged 18 years and above presenting with moderate to critical symptoms of PCR-confirmed COVID-19 disease within 15 days of symptoms onset were recruited. Patients with respiratory compromise and blood oxygen saturation (SpO<sub>2</sub>) <93% on room air detected on pulse oximeter were considered to fulfil the moderate infection criteria. Patients with respiratory failure, septic shock and/or multiple organ dysfunction/failure needing assisted ventilation were considered to be critically ill. Pregnant or breast-feeding women, individuals already receiving specific monoclonal antibody therapy or those with severe immunodeficiency syndrome and hypoalbuminaemia and patients with hypersensitivity to leflunomide or liver



1  
2  
3 enzymes aspartate transaminase (AST) / alanine transaminase (ALT)  $\geq 2$  x upper limits of normal (ULN) were  
4 excluded from the study. All participants gave written informed consent to a member of their clinical care team.  
5  
6

7  
8 *Randomisation* – Consented participants were randomised by a member of the clinical care team to either the  
9 control arm (receiving standard of care treatment [SOC] alone) or the intervention arm (SOC treatment +  
10 leflunomide (SOC+L)) using a stratified block randomisation web-based algorithm. Patient admission data (age  
11  $\leq/\geq 70$ ; co-morbidities; clinical status based on National Early Warning Score 2, NEWS2)<sup>[10]</sup> were used to stratify  
12 patients into 4 risk categories. Group 1: high/moderate comorbidity risk with NEWS2 score  $\geq 5$ ; Group 2:  
13 high/moderate comorbidity risk with NEWS2 score  $< 5$ ; Group 3: low comorbidity risk with NEWS2 score  $\geq 5$ ;  
14 and Group 4: low comorbidity risk with NEWS2 score  $< 5$ .  
15  
16  
17  
18

19  
20 *Interventions* - The definition of the SOC treatment for COVID-19 evolved nationally and internationally through  
21 the course of our study, with progressive evolution in the understanding of disease pathology and emerging  
22 treatment evidence. The SOC during the time of the study across all sites involved four main treatment domains:  
23 steroids, anticoagulation, antibiotics, and antiviral medications. The intervention group (SOC+L) received oral  
24 leflunomide at a loading dose of 100mg/day for three days and then 20mg/day for 7 days as a maintenance dose.  
25 The maintenance dose was reduced to 10mg/day if liver enzymes AST/ALT exceeded 2 x ULN. Leflunomide  
26 treatment was stopped early if AST/ATL exceeded 3 x ULN during the intervention. Study participants received  
27 additional COVID-19 therapies, including monoclonal antibodies, at the discretion of the direct care clinical team,  
28 even if leflunomide was initiated.  
29  
30  
31  
32  
33

34 *Study procedures* - Patient related clinical/investigation data, treatment compliance, outcomes and adverse events  
35 (AE) were collected by the site investigators and recorded on the pre-specified daily electronic case report form  
36 (e-CRF, see Appendix). Adverse events (AE) were graded according to the Common Terminology Criteria for  
37 Adverse Events.<sup>[11]</sup> Blood samples were collected and processed for quantifying viral load (on days 1, 7, 11, 15,  
38 28 or day of discharge) and for future inflammatory profiling (on days 1, 3 and 11). Liver enzymes were measured  
39 at baseline, on day 3 after the leflunomide loading and on discharge. Patient questionnaire was administered at  
40 28- and 90-days after randomisation to monitor the persistence of symptoms possibly associated with long COVID  
41 syndrome.<sup>[12]</sup> SpO<sub>2</sub>/FiO<sub>2</sub> data were monitored daily. The frequency of SpO<sub>2</sub> monitoring varied with FiO<sub>2</sub>  
42 administration. It is standard clinical practice that SpO<sub>2</sub> is monitored every 4 hours in a clinically stable patient.  
43 The frequency increases to continuous SpO<sub>2</sub> monitoring in a patient with oxygen requirement or ventilation  
44 support. Where multiple daily values were recorded we selected the SpO<sub>2</sub>/FiO<sub>2</sub> ratio reflecting increased oxygen  
45 demand.  
46  
47  
48  
49  
50  
51

52 *Blinding* - Site investigator teams and direct clinical care teams were not blinded to the randomisation outcomes,  
53 but neither were provided information about the aggregate patient outcomes.  
54  
55  
56  
57  
58  
59  
60

1  
2  
3 *Outcomes* - The primary outcome is the time (days) from randomisation to clinical improvement (TTCI) of two  
4 points on a seven-category clinical status scale or live discharge from hospital prior to 28 days.<sup>[13]</sup> The clinical  
5 status ordinal scale consisted of the following: 1 not hospitalised, resumption of normal activities; 2 not  
6 hospitalised, but unable to resume normal activities; 3 hospitalised, not requiring supplemental oxygen; 4  
7 hospitalised, requiring supplemental oxygen; 5 hospitalised, requiring nasal high-flow oxygen (HFNC) therapy,  
8 non-invasive mechanical ventilation (NIV), or both; 6 hospitalised, requiring extracorporeal membrane  
9 oxygenation (ECMO), invasive mechanical ventilation (IMV), or both; and 7 death.

10  
11  
12  
13  
14  
15 Safety profile of leflunomide in this group of patients was assessed from incidence rates of AE deemed to be  
16 serious and/or severe ( $\geq$ Grade 3). Grading guidelines suggest 5 categories: 1 mild, asymptomatic or mild  
17 symptoms, clinical or diagnostic observations only, intervention not indicated; 2 moderate, minimal, local or non-  
18 invasive intervention indicated, limiting age-appropriate instrumental activities of daily livings (ADL); 3 severe,  
19 medically significant but not immediately life-threatening, hospitalization or prolongation of hospitalization  
20 indicated, disabling; limiting self-care ADL; 4 life-threatening consequences, urgent intervention indicate; 5 death  
21 related to AE. In addition, the incidences, and levels of liver transaminitis (ALT, AST) were assessed.

22  
23  
24  
25  
26 The main secondary outcomes were focused on overall (all-cause) mortality, and oxygen dependence (duration in  
27 days) assessed by S/F ratio (i.e. oxygen saturation detected by pulse oximeter [SPO<sub>2</sub>] / supplemental oxygen  
28 concentration [FiO<sub>2</sub>]) and impact on viral replication (viral load). Additional secondary outcomes included  
29 inflammatory targets such as CRP, lymphocyte counts, and selected cytokines (initially focussing on IL2, IL6,  
30 TNF- $\alpha$ ). The concept of long COVID emerged during the study, so we used the data from our questionnaires at  
31 28 and 90 days to comment on long COVID symptoms

### 32 **Statistical analyses**

33  
34  
35  
36  
37 *Sample size calculation* - The primary outcome measure was a time-to-event analysis based on an assessment of  
38 TTCI. Since our study protocol was conceived and developed during the initial peak of the global pandemic, the  
39 precise hazard ratio for major clinical outcomes related to this infection was largely unknown and, therefore,  
40 sample size calculation was based on the proportion of patients expected to meet the outcome criteria by 28 days.<sup>[14]</sup>  
41 Assuming  $\alpha = 0.05$ ,  $\beta = 0.20$  and allocation ratio = 1:1, the number of patients per treatment arm was estimated  
42 to be 74. We expected a 20% attrition rate, so the total number of patients required in the study was calculated to  
43 be 178, 89 patients in each arm.

44  
45  
46  
47  
48 *Analysis population* - The full analysis set was defined according to the intention to treat principle (ITT). All  
49 subjects randomised were included in the ITT analysis set for the primary outcome, regardless of whether they  
50 received any dose of their allocated treatment. This analysis set was used to summarize baseline patient  
51 characteristics and to carry out all efficacy and safety assessments. Subjects were analysed according to their  
52 randomised treatment allocation. We also present a modified intention to treat analysis for the primary and  
53 secondary outcomes, as a sensitivity analysis, to account for study participants who were randomised in error and  
54 those who withdrew consent prior to the intervention.

55  
56  
57  
58 *Primary outcomes* - The TTCI data was estimated using Kaplan-Meier survival curves. Hazard ratio and 95%  
59 confidence intervals were estimated using Cox proportional hazards regression models. The primary analysis was  
60

1  
2  
3 stratified by the randomisation strata: baseline risk indicators (age  $\leq$  70 years, co-morbidities) and NEWS2 score.  
4 Log rank test was used for comparing the Kaplan-Meier curves, hazard ratios and their confidence intervals for the  
5 significance of the treatment effect.  
6

7  
8 *Secondary outcomes* - Continuous secondary outcomes were evaluated for within-groups differences using the  
9 Mann-Whitney U or Wilcoxon rank tests, respectively, depending on the data distribution identified: parametric  
10 or non-parametric. Statistical normality was assessed using the Shapiro-Wilk method. Categorical outcomes were  
11 assessed for between-group differences using the chi-square method and expressed as %. For all outcomes,  
12 statistical significance was accepted at a 2-sided  $\alpha$  of 0.05.  
13

14  
15 *Adverse events* - AEs were coded using MedDRA and assigned grades based on National Cancer Institute  
16 Common Terminology Criteria for Adverse Events Version 4.03.<sup>[11]</sup>  
17

### 18 19 20 **Public and patient involvement**

21 Patient volunteers were consulted regarding the study design and materials to be provided to the potential  
22 participants (patient information sheet, consent forms, questionnaires). Two lay members were appointed to the  
23 Trial Steering Committee and provided input on the conduct of the study.  
24  
25  
26  
27  
28  
29  
30  
31  
32  
33  
34  
35  
36  
37  
38  
39  
40  
41  
42  
43  
44  
45  
46  
47  
48  
49  
50  
51  
52  
53  
54  
55  
56  
57  
58  
59  
60

## Results

### Recruitment, Randomisation, Assignment of Therapy and Follow-up

Between September 2020 and May 2021, 214 patients were recruited to the study from 2 UK Hospitals (n=66, 31%; Ashford and St Peters' NHS Trust, Surrey; Kingston Hospital NHS Trust, London) and 3 Hospitals in India; (n=148, 69%; Max Hospital, Delhi; Meditrina Institute, Nagpur; Noble Hospital, Pune). Due to the wavering new COVID-19 infections, the UK recruitment came to a halt in February 2021 and patients at the three Indian sites were recruited in the remaining period. Of the 214 participating patients, 104 were randomised to the intervention (SOC+L) group and 110 to the control (SOC) group. In the SOC+L group, 3 patients withdrew study consent after randomisation, and did not receive leflunomide therapy. During the data cleaning process, 10 patients were flagged as not meeting the inclusion criteria (6 in SOC+L; 4 in SOC), as they did not have moderate COVID-19 symptoms at the time of randomisation. Daily clinical data were collected for all patients during hospitalisation and the patients were asked to complete follow-up questionnaires at 28- and 90-days after randomisation, as shown in Figure 1 (CONSORT diagram).

Baseline patient characteristics were similar between the SOC+L and SOC groups, summarised in Table 1.

| Characteristics                                         | SOC+L<br>n=104  | SOC<br>n=110    |
|---------------------------------------------------------|-----------------|-----------------|
| Age, yrs, mean $\pm$ sd                                 | 55.2 $\pm$ 14.7 | 56.4 $\pm$ 15.2 |
| BMI, kg/m <sup>2</sup> , mean $\pm$ sd                  | 27.3 $\pm$ 5.1  | 27.7 $\pm$ 5.6  |
| Female gender at birth, %                               | 28.8            | 37.3            |
| <b>Ethnicity, %</b>                                     |                 |                 |
| South Asian                                             | 75              | 69              |
| White                                                   | 24              | 30              |
| Arab                                                    | -               | 0.91            |
| <b>Comorbidities, %</b>                                 |                 |                 |
| BMI $\geq$ 40 kg/m <sup>2</sup>                         | 2.9             | 4.6             |
| Age $\geq$ 70 yrs                                       | 18.3            | 20              |
| Chronic respiratory disease                             | 8.7             | 15.5            |
| Chronic cardiovascular disease (including hypertension) | 38.5            | 39.1            |
| Chronic renal disease                                   | 2.9             | 2.7             |
| Diabetes                                                | 23.1            | 20.9            |
| Immunosuppressive diseases                              | 6.7             | 6.4             |
| <i>Others</i>                                           |                 |                 |
| Malignant neoplasm                                      | 3.9             | 2.7             |
| Chronic haematological disease                          | 1               | 0.9             |
| Chronic neurological disorder                           | 10.6            | 3.7             |
| Malnutrition                                            | 1               | 0.9             |
| Smoking (present or past)                               | 21.1            | 20              |
| <b>Symptom duration, day, median (IQR)</b>              | 6 (4-8)         | 6 (5-8)         |
| <b>Time from admission, day, median (IQR)</b>           | 2 (1-4)         | 2 (1-3)         |
| <b>Non-invasive ventilation, %</b>                      | 4.8             | 7.3             |
| <b>Invasive ventilation, %</b>                          | 1               | 1.8             |
| <b>NEWS 2 score median (IQR)</b>                        | 6 (4-8)         | 5 (4-8)         |
| <b>CRP, mg/L, median (IQR)</b>                          | 28 (9-77)       | 32 (13-64)      |
| <b>Transaminase, &gt;ULN, %</b>                         |                 |                 |
| ALT                                                     | 44.7            | 31.7            |
| AST                                                     | 35.4            | 28.4            |
| <b>Stratification, %</b>                                |                 |                 |
| Group 1                                                 | 12.5            | 14.5            |
| Group 2                                                 | 14.4            | 16.4            |
| Group 3                                                 | 48.1            | 46.4            |
| Group 4                                                 | 25              | 22.7            |

**Table 1: Baseline patient characteristics at the time of randomization**

BMI: Body mass index; ULN = upper limits of normal; Group 1: High/Moderate comorbidity risk with NEWS2 score  $\geq$ 5; Group 2: High/Moderate comorbidity risk with NEWS2 score <5; Group 3: Low comorbidity risk with NEWS2 score  $\geq$ 5; and Group 4: Low comorbidity risk with NEWS2 score <5. Creatinine ULN: 104 $\mu$ mol/L; ALT ULN: 49 U/L; AST ULN: 48 U/L; Immunosuppressive disease: asplenia, rheumatological disorder.

1  
2  
3 Baseline characteristics were similar in both arms but there were significantly more patients with chronic  
4 neurological disorders in the SOC+L group. None of the patients with this condition had contraindication to  
5 non-invasive ventilation.  
6  
7

## 8 Treatment Assignment and Compliance

9 Full course of leflunomide therapy was completed by 81/104 patients (78%). Of the 19 patients (16 in UK, 3 in  
10 India) who did not complete treatment, 3 patients did not receive a single dose of leflunomide as they withdrew  
11 consent soon after randomization, 5 patients died prior to completion of the full course, 8 patients stopped  
12 leflunomide early when ALT/AST exceeded 3 x ULN laboratory reference range, 1 patient had tocilizumab  
13 introduced to replace leflunomide, 1 patient self-discharged early and 1 refused final two doses. Leflunomide  
14 treatment compliance appeared to be better in participants from Indian centres as 92% of them received the full  
15 dose of leflunomide compared to 52% of patients in the UK centres which was largely due to a higher incidence  
16 of liver enzyme transaminitis and mortality observed in the UK cohort.  
17

18 There was no significant difference in the assignment of standard of care treatment between the SOC+L and  
19 SOC groups as shown in Figure 1. It included corticosteroids, anticoagulants, antibiotics, and antiviral therapies.  
20 Overall, steroid uptake was >95% in both treatment arms with different protocols used at participating study  
21 centres: dexamethasone 4 mg/day for 3 days; dexamethasone 6 mg/day for 7-10 days; methylprednisolone 80  
22 mg/day for 7 days and methylprednisolone 120 mg/day for 5 days. However, there was no difference in the  
23 steroid treatment assigned between the control and the treatment groups. There were some differences in the  
24 proportions of patients receiving additional adjunct therapies such as hydroxychloroquine and immunotherapy  
25 (Supplementary table 1). Overall, hydroxychloroquine was prescribed to similar proportion of patients in the  
26 intervention and the control group (47%) but the proportions of patients receiving it in the UK was much  
27 smaller, 3% compared to 67% in India. A small number of patients received immunomodulating drugs such as  
28 interferon alpha and beta (n = 20 in India), tocilizumab and bevacizumab (n = 5 in the UK, n = 2 in India).  
29  
30  
31  
32  
33  
34  
35  
36  
37  
38

## 39 Primary Outcomes

40 *Time to clinical improvement of 2 points on a clinical status scale/discharge before 28 days*

41 In the ITT analyses (n = 214), SOC+L group did not have a significantly shorter TICI than the SOC group  
42 within 28 days of randomisation; the median was 7.0 (IQR 7.0 - 8.0) days vs. 8.0 (IQR 7.0 - 9.0) days,  
43 respectively; with a hazard ratio (HR) of 1.32 (CI 0.98 -1.77), p = 0.070 (Figure 2).  
44

45 In modified ITT population (n = 201) where 3 patients who withdrew consent after being randomised to the  
46 SOC+L group but never received leflunomide treatment and 10 patients who did not fulfil moderate COVID-19  
47 symptoms at randomisation were excluded from analysis, the median TICI was significantly shorter in the  
48 SOC+L group than SOC group by 1.0 day, median 7.0 days (IQR 7.0 -8.0) vs. 8.0 (IQR 7.0 – 9.0), respectively,  
49 with a HR of 1.42 ( CI 1.04 – 1.94); p = 0.028.  
50  
51  
52  
53

## 54 Safety

55 Incidences of AE of all grades are summarized in Table 2.  
56  
57  
58  
59  
60

| Adverse events                                      | SOC+L<br>(n= 104) | SOC<br>(n=110) |
|-----------------------------------------------------|-------------------|----------------|
| <b>Adverse events (n) / Patients (n)</b>            | 121 / 56          | 91/ 42         |
| Grade 1 (Mild)                                      | 58 / 39           | 48 / 32        |
| Grade 2 (Moderate)                                  | 23 / 13           | 17/9           |
| Grade 3 (Severe)/ Grade 4 (Life threatening events) | 31/15             | 16/9           |
| Grade 5 (Deaths)                                    | 9/9               | 10/10          |

**Table 2: Incidence of reported adverse events in both treatment arms.**

The table shows the number of adverse events recorded in the study and the number of patients affected by at least one adverse event.

At least one AE was reported in 98/214 participants, and most of them were mild in severity. AEs of moderate grade were reported in 13/104 patients in SOC+L group and 9/110 patients in SOC group. Serious AEs (n=47) were reported in 15/104 patients in SOC+L groups and 9/110 in SOC group and 19 patients died (9 in SOC+L group, 10 in the SOC group). There was no significant difference in the incidence of AE reported between the two groups. No Serious AEs were attributed to leflunomide. A supplementary Table 2 lists all adverse events recorded in the study according to MedDRA terms.

### *Liver function*

At baseline, more patients with greater than ULN levels of ALT and AST were randomized in the SOC+L group than the SOC group (ALT: 46 vs 33,  $p = 0.049$ ; AST: 31 vs 24,  $p = 0.340$ ). By Day 3/4, following the initial loading of leflunomide therapy in the SOC+L group, there was a significantly higher number of patients with greater than ULN level of ALT and AST in the SOC+L than the SOC group (64 vs 38,  $p < 0.001$ ; and 51 vs 24,  $p < 0.001$ ). By discharge, the difference in the number of patients with ALT and AST transaminitis between the SOC+L and SOC groups was no longer significant (28 vs 27,  $p = 0.633$ ; and 20 vs 17,  $p = 0.318$ ) (Supplementary table 3). Leflunomide therapy was terminated early if transaminase levels exceeded 3 x ULN. However, there were 5 patients in India who continued with leflunomide therapy at the discretion of the researcher and direct care team with close monitoring of their liver function. Interestingly, in this subset of patients, the transaminase levels improved despite continuation of therapy. There were no adverse events related to clinically significant liver injury due to leflunomide. AEs related to liver dysfunction were reported in 16/104 (15.4%) patients in SOC+L group, 7 were mild, 8 were moderate and 1 was severe. Of these, 10 were deemed possibly treatment related and leflunomide treatment was discontinued in 9 patients. Comparatively, in the control group, 6/110 (5.5%) patients had liver dysfunction related AE. Five of them were mild and 1 case was severe.

### **Secondary Outcomes**

A modified intent to treat approach was used for data from 201 patients for all secondary outcomes. This included 95 patients in the SOC+L group and 106 patients in SOC group. For these analyses we excluded 3 patients in the SOC+L group who withdrew consent and never received leflunomide and 10 patients (6 SOC+L; 4 SOC) who



1  
2  
3 did not fulfil moderate COVID symptoms inclusion criterion (did not show respiratory compromise and blood  
4 oxygen saturation (SpO<sub>2</sub>) <93% on room air).  
5  
6  
7

### 8 *Mortality*

9  
10 There was no difference in all-cause mortality within 28 days of randomization between the treatment arms as  
11 9/95 (9.47%) of patients died in SOC+L group compared to 10/106 (9.43%) in SOC groups. The survival curves  
12 diverge in favour of the SOC+L group after 10 days of hospital treatment, but the curves converged again after 3  
13 weeks (when majority of the patients have been discharged). All deaths were attributed to complications related  
14 to Covid-19 (Figure 3, panel A).  
15  
16  
17

### 18 *Oxygenation and assisted ventilation*

19  
20 Oxygen independence is defined by maintenance of SpO<sub>2</sub>/FiO<sub>2</sub> Air ratio > 4.43. There was a difference in the  
21 median time the participants required to be completely weaned off oxygen therapy between groups; 6.0 (IQR  
22 4.0 – 8.0) days in the SOC + L group vs. 7.0 (5.0 – 10.0) days in the SOC group, p = 0.047 (Figure 3, panel B)  
23  
24  
25

26  
27 Non-invasive ventilation was required for 14.4% of patients in SOC+L group vs. 16.4% in the SOC group. The  
28 duration of non-invasive ventilation was 6.0 (IQR 2.0-9.0) days in the SOC+L group compared to 4.5 days (IQR  
29 2.3-6.8) in the SOC group. Similar proportion of patients required non-invasive ventilation at the time of study  
30 enrolment (4.8% in SOC+L group vs. 7.3% in SOC group, p= 0.45).  
31

32  
33 The proportion of patients admitted to level-2 Intensive Care Unit (ICU) was 8.7 % in the SOC+L group and  
34 8.2% in the SOC group. The median time spent at ICU was 8.0 (IQR 5.0-10.0) days vs. 9.0 (IQR 5.0-13.0) days,  
35 respectively. Invasive ventilation was required for 3.9% of patients in the SOC+L group and 5.5% in the SOC  
36 group with median duration of 6 (IQR 4.8, 6.0) days vs. 7.0 (IQR 5.3 - 11.8) days, respectively. None of the  
37 between group comparisons were statistically significant. Patients recruited in India were significantly less  
38 likely to require invasive or non-invasive ventilation or be admitted to ICU compared to patients recruited in the  
39 UK (p<0.001).  
40  
41  
42  
43

### 44 *Viral load*

45  
46 Quantitative SARS-COV-2 PCR measurements from nasopharyngeal swabs at baseline showed no difference in  
47 median log<sup>10</sup> viral loads (copies/ml) between the two groups, SOC+L 4.68 (IQR 4.45-4.85) vs SOC 4.76 (IQR  
48 4.48-4.92), p =0.27.. We clustered the serial samples to reflect the crucial time intervals during the hospital stay:  
49 time coinciding with finishing leflunomide loading dose (by Day 4), time to 75% patients being discharged from  
50 hospital (by Day 7), time to finishing leflunomide maintenance dose (by Day 11) and beyond (Figure 4). Viral  
51 loads were significantly reduced in both treatment arms. There was no significant difference in the overall rate  
52 of the viral load clearance between the two groups by Day 11 and beyond. Viral loads were significantly  
53 reduced in both treatment arms by Day 7, p<0.001; and by Day 11, p <0.030. The rate of viral load reduction  
54 between groups by Day 11 appeared to be similar.  
55  
56  
57  
58  
59  
60



### *Cytokines, CRP and lymphocytes*

Cytokine levels were assessed separately for UK and Indian sites as two laboratories using different assays processed the samples. The median baseline levels of IL 2, IL 6 and TNF- $\alpha$  levels (UK: IL2 0.43 [IQR 0.30-0.62] pg/ml; IL6 6.2 [IQR 2.9-9.7] pg/ml; TNF- $\alpha$  10.1 [IQR 7.8 -13.5] pg/ml; India: IL2 4.3 [IQR 2.8-5.8] pg/ml; IL6 12.6 [IQR 6.5-43.1] pg/ml; TNF- $\alpha$  6.1 [IQR 4.9-7.1] pg/ml) were not significantly raised from normal reference ranges and were not different between treatment groups in both countries. The cytokine levels were reduced during hospitalisation, though the clinical significance of these changes within the normal range is uncertain. There was no significant difference in the trends observed between treatment arms.

The median baseline levels of CRP were similar in both groups, 28, (IQR 8-71) in SOC+L vs. 34 (14-71) mg/L in SOC. By one week of treatment, there was similar levels of reduction between groups.

The median baseline lymphocytes levels were lower than normal reference range in both groups (0.99 [IQR 0.6-1.6]  $\times 10^9/L$  in SOC+L vs 0.95 (IQR 0.6-1.6)  $\times 10^9/L$  in SOC. By 1 week of treatment, levels rose to normal range in both groups. There was no significant difference in the trends observed between groups.

### *28- and 90-days follow up*

At 28 days, 59/81 patients (71.2%) in the SOC+L group and 60/91 patients (65.9%) in the SOC group experienced at least 1 of 9 common long-COVID symptoms (fatigue, cough, anxiety, chest pain, brain fog, breathlessness, disturbed sleep, palpitations, joint pain); with sleep quality (48.2% vs. 38.5%), breathlessness (40.7 vs 42.9%), joint pain (32.1 vs. 33%), fatigue (29.6 vs, 31.9%), and anxiety (24.7 vs. 19.8%) being the commonest symptoms experienced (Supplementary table 4). At 90 days, there was a reduction in overall prevalence of symptoms as 42/81 patients (51.2%) in the SOC+L group and 37/91 (40.7%) patients in the SOC group and any of the residual symptoms were of reduced severity. There was no significant difference in these outcomes between the treatment arms.

Myalgia symptoms were comparably reduced between the 2 groups at 90 days. Anosmia and loss of taste were still reported by 2 and 7 patients, respectively, in the SOC+L group, but none in the SOC group.

At 28 days, 41.5% patients in the SOC + L group and 52.8% in SOC group, reported being moderately to severely dyspnoeic (Grade 4: stops for breath after walking 100m; Grade 5: too breathless to leave the house or breathless when dressing). These proportions were further reduced at 90 days, to 22% in the SOC+L group compared to 19.8% in SOC group. These differences were not significant in between group comparisons.

Mental health issues were highlighted by reports of feeling depressed and losing interest in doing things. Comparable proportions of patients in the SOC+L group and SOC group reported those problems at 28 days (17.9% vs 16.0%; 11.6% vs 14.2%, respectively) which were further reduced in both groups at 90 days (11.6% vs 9.4%; 9.5% vs 6.6%, respectively).

1  
2  
3 At 28 days participants in the SOC+L group scored their current health as being  $80\pm 25\%$  of the usual which  
4 increased to  $89\pm 17\%$  at 90 days. In the SOC group the scores were similar,  $82\pm 23\%$  and  $90\pm 17\%$  at 28 and  
5 90 days respectively.  
6  
7  
8  
9  
10  
11  
12  
13

## 14 Discussion

16 This study is the first prospective, multicentre, randomised, controlled clinical trial investigating the clinical  
17 efficacy and safety of leflunomide in treating acute COVID-19 infection. The study showed that a course of  
18 leflunomide (3 days of 100 mg/day loading dose followed by 7 days of 20 mg/day maintenance dose) added to  
19 the standard care treatment (steroids, anticoagulants, antibiotics and antiviral therapy), did not influence the  
20 primary outcome of the trial and the acute clinical outcomes at 28 days, or the prevalence of long-COVID  
21 symptoms at 28 and 90 days. However, participants who received leflunomide as an adjunct therapy were  
22 weaned off oxygen earlier, which translated to reduced hospital stay by one day. The medication appeared to be  
23 safe and well tolerated with no severe adverse events attributable to it. A small proportion of patients in our  
24 study were still burdened by COVID-19 related symptoms 90 days after randomisation.  
25  
26  
27  
28  
29  
30

31 This multicentre trial advances the evidence base on the impact of leflunomide, a repurposed rheumatoid  
32 arthritis medication, on COVID-19 infection. Leflunomide was a potentially attractive therapeutic choice from  
33 early preclinical and clinical experience reported from hospitals in Wuhan, China. Dihydroorotate  
34 dihydrogenase (DHODH), located in the inner mitochondrial membrane is a rate-limiting enzyme in de novo  
35 pyrimidine biosynthesis. In virus-infected cells, a large intracellular nucleotide pool is consumed by rapid viral  
36 replication. RNA viruses need unique UMP but not TMP in their genomes. As UMP is the particular nucleoside  
37 produced by DHODH, RNA viruses are sensitive to reduced DHODH activity. Preclinical models of cell and  
38 animal infection by SARS-CoV-2 demonstrated that leflunomide attenuates viral genome replication, suppresses  
39 inflammatory response and the release of pro-inflammatory cytokines and chemokines.<sup>[7,8,9]</sup> Early reports from  
40 China advocated major clinical benefits in patients treated with leflunomide both in terms of less severe  
41 outcomes and duration of infection.<sup>[15,16,17]</sup> While the current study did not reproduce these overall benefits in  
42 the ITT analysis regarding the primary outcome, it confirmed some positive effects in those patients who  
43 received the trial intervention (in modified intent to treat analysis).  
44  
45  
46  
47  
48  
49  
50

51 Our results are likely explained by the changing landscape and evolution of the routine COVID-19 treatment  
52 protocols in the standard arm of the study and the resultant severity of the COVID-19 outcomes in general. The  
53 initial phase of the COVID-19 pandemic was characterised by severe respiratory and systemic infections and poor  
54 outcomes due to the development of acute respiratory distress syndrome, multi-organ failure and eventual  
55 death.<sup>[18,19]</sup> Contrary to this early experience with COVID-19 management, the in-hospital mortality in the present  
56 study was much lower, less than 10% in both groups. The majority of patients in both treatment arms improved  
57 during hospitalisation and were discharged within a week of admission. Inclusion of prognostically significant  
58  
59  
60

1  
2  
3 COVID-19 therapies in both pharmacological and non-pharmacological standard of care treatments undoubtedly  
4 contributed to a reduction in severe complications and better overall outcomes. During patient recruitment in our  
5 study, various therapies have been introduced based on the results of different trials.<sup>[20,21]</sup> For example, more than  
6 95% percent of the study population received steroids as standard of care.  
7  
8  
9

10 Theoretical considerations suggest that leflunomide may effectively inhibit viral replication. The initial pilot  
11 study during the early outbreak of COVID-19 in Wuhan, China reported reduced viral shedding time following  
12 leflunomide treatment during acute infection compared to the standard of care therapy.<sup>[15]</sup> Similarly, viral shedding  
13 duration was reduced in leflunomide treated patients who remained qPCR positive 1 month after the initial  
14 infection.<sup>[16]</sup> Our study addressed the viral load reduction at pre-specified time points. Values of viral load were  
15 reduced over time but there was no difference between the treatment arms. Both methodological considerations  
16 and the inclusion of comprehensive pharmacological treatment regimens in the SOC could explain these  
17 differences. For instance, corticosteroid therapy was absent in the early study from Wuhan, but the later study  
18 refers to the use of hydroxychloroquine, interferon-alpha and antiviral medications as part of acute standard of  
19 care therapy.<sup>[15,16]</sup> However, our results are in line with other reports from China which showed that duration of  
20 viral shedding was not affected by leflunomide added to nebulised interferon alpha therapy for treating long-term  
21 positive COVID-19 after 4 weeks of in-hospital treatment.<sup>[17]</sup> Interestingly a third of these patients received  
22 corticosteroid therapy during the initial acute treatment.<sup>[16,17]</sup>  
23  
24  
25  
26  
27  
28  
29

30 Beyond the issue of therapeutic efficacy and viral load, our study confirms overall safety of leflunomide in  
31 COVID-19 infection. The safety profile of leflunomide is well established in the treatment of RA.<sup>[6]</sup> Leflunomide,  
32 repurposed for the COVID-19 treatment, was well tolerated since no serious adverse events were attributed to it.  
33 Similar findings were reported in other studies.<sup>[15,16,22]</sup> Mild transaminitis following long-term leflunomide use in  
34 the RA population is recognised, and usually resolves after medication is terminated. The mechanism is likely to  
35 be modulation of interleukins which may hinder the protection of hepatocytes from injury rather than direct  
36 toxicity.<sup>[23]</sup> There were comparable incidences of transaminitis in both treatment arms in our study. However,  
37 more patients in the UK cohort had raised liver function tests leading to modification or termination of leflunomide  
38 treatment. This may be accounted for by the difference in the severity of COVID-19 disease and spectrum of co-  
39 morbidities between UK and Indian participants rather than genetic polymorphism in drug metabolism. Overall,  
40 the proposed leflunomide regimen was well tolerated.  
41  
42  
43  
44  
45  
46  
47

48 One of the motivations of the current trial employing leflunomide was to benefit from the anti-inflammatory  
49 effects of this drug. In this context, hydrocortisone has been demonstrated as an effective therapy in severe  
50 COVID-19 infections and recent trials also demonstrated the benefit of tocilizumab, a selective IL-6 inhibitor and  
51 a different disease modifying rheumatoid arthritis medication. However, such finding is not universal as the  
52 benefit of tocilizumab is mainly demonstrated in critically to moderately ill patients.<sup>[20,21]</sup> A recent meta-analysis  
53 showed that the benefit of IL-6 receptor antagonist was encountered only in patients who were also treated with  
54 glucocorticoids.<sup>[24]</sup> This is in keeping with observations that a broader spectrum of pro-inflammatory cytokines,  
55 macrophages and T cell response have all been documented in severely ill patients demonstrating the role of a  
56 more complex inflammatory response. It is exactly this broader inflammatory reaction that could be targeted by  
57  
58  
59  
60

1  
2  
3 leflunomide as its effect on cytokines is not restricted to IL 6 and it may also have an impact on activated T cell  
4 response.<sup>[8,9,25]</sup> Such phenomena might contribute to the benefits of reduced oxygen dependence in patients who  
5 have received leflunomide treatment. However, it is conceivable that the full benefit of such anti-inflammatory  
6 effect may be more pronounced in severely ill patients, but this population was underrepresented in our trial and  
7 the (inadvertent) inclusion of patients with milder symptoms may have led to some attrition of statistical power  
8 in our study. A more detailed analysis of the cytokine and metabolic profiles of our trial population is underway  
9 to clarify these important issues.

10  
11  
12  
13 Another important consideration when discussing the potential benefits of leflunomide is the mutation ability of  
14 the SARS-CoV-2 virus.<sup>[26]</sup> So far, the mutations observed in different strains worldwide have largely been  
15 confined to the part of the spike protein affecting the virus's ability of cell entry as opposed to a region targeted  
16 by neutralising antibodies. However, the possibility of mutations in different regions cannot be excluded.  
17 Targeting the host's pyrimidine biosynthesis pathway by leflunomide, rather than using drugs with direct antiviral  
18 action, remains an advantage offering protection against a broader spectrum of viruses and potentially overcoming  
19 resistance. Indeed, DHODH inhibitors such as leflunomide has shown broad-spectrum antiviral effects against  
20 various RNA viruses in cell models.<sup>[7]</sup> Leflunomide may therefore be considered a viable pharmacological  
21 treatment for COVID-19 patients given it is well tolerated, safe, economical, and widely available. Its clinical  
22 effectiveness measured against recognised selective IL-6 inhibitors in the more severely/critically ill patients  
23 needs to be further explored as leflunomide may be the preferred option in countries where other  
24 immunomodulating agents, such as Talizumab, may not be practical or widely available.

### 33 **Limitations**

34  
35  
36 The present study has several limitations. In order to balance the needs of the trial with clinical care and to  
37 minimise disruption to already overstretched clinical resources during COVID-19 pandemic, we chose to adopt  
38 an open label study design. This design may have affected the data collection and clinical management of the  
39 patients and potentially introduced a bias. However, it also allowed early detection of significant adverse events  
40 and a potential outcome benefit. This was an important consideration when testing an off-label use of a medication  
41 in COVID-19, a disease with high morbidity and mortality.

42  
43  
44 The study was set out to recruit more severely and critically affected patients in a single country. However, due  
45 to recruitment restrictions because of national prioritization of critically ill patients to only a few studies  
46 together with scarcity of NHS resources during the pandemic, the study was extended abroad, ultimately  
47 recruiting less affected patients with heterogeneous clinical profiles. Although patient characteristics and  
48 medications received as part of SOC did not differ between the randomised arms, the more heterogeneous  
49 population, milder COVID-19 disease, and more effective standard of care treatments most likely impacted on  
50 the hypothesised effect size and the ability of finding a difference in our recruited sample. Finally, the COVID-  
51 19 restrictions affected our protocolised laboratory investigations, such as the serial viral load and  
52 comprehensive inflammatory profiling. Nevertheless, studies focusing on the more severely affected participants  
53 are underway and will be the subject of a separate submission.

### 59 **Conclusion**

1  
2  
3 Leflunomide had no major impact on the clinical outcomes when administered together with the currently  
4 established but evolving therapies in moderately affected COVID-19 patients. It may shorten duration of oxygen  
5 dependence thereby affecting the TTCI and hospital discharge. Transaminitis associated with leflunomide therapy  
6 did not lead to excess adverse events compared to the control group and may have arisen in part due to the severity  
7 of clinical infection. Further studies are needed to investigate the potential benefits of leflunomide in the critically  
8 ill patients and the biological mechanisms involved.  
9  
10  
11

### 12 13 **Ethics statements**

14  
15 All patients taking part in the study signed written informed consent form once the study was ethically approved  
16 by relevant bodies in England (South Central - Berkshire Research Ethics Committee, Bristol REC Centre,  
17 reference number 20/SC/0264) and India (Max HealthCare Ethics Committee, reference number  
18 RS/MSSSH/GMHRCCMS/MHEC/CCM/20-23; Meditrina Institute Ethics Committee, reference number  
19 ECR/605/Inst/MH/2014/RR; Noble Hospital Institutional Ethics Committee, reference number  
20 NHIEC/FEB/2021/238).  
21  
22  
23

### 24 25 **Data availability statement**

26  
27 The anonymized data may be available upon request following approval from the Trial Management Group and the  
28 Sponsor.  
29

### 30 31 **Acknowledgments**

32 We are grateful to all the patients who took part in the study and contributed their data to our research. We also  
33 thank their clinical care teams who helped with data collection. We are grateful for the support from medical  
34 research charity LifeArc as part of its initiatives to address the need for new therapies against COVID-19 against  
35 the backdrop of world pandemic.  
36

37 We would like to acknowledge the vital roles of the following:

38 **Data Monitoring Committee:** David Morgan (Chair), Lajos Szentgyorgyi, Yee Cheah

39  
40 **Trial Steering Committee:** Brendan Madden (Chair), Patrick Yong, Sreenivasa Rao Kondapally Seshasai, Matt  
41 Mendes, Janice Rodrigues-Mendes, Rod Hughes, Sharanpal Jeetle, Subash Somalanka

42  
43 **Clinical Research Organisation:** Innovate Research CRO in India helped with site and patient recruitment,  
44 project management, monitoring & data collation: Devesh Kumar (Director), Piyush Kumar Pandey (Head  
45 Clinical Operations), Shaitan Singh (Assistant Project Manager), Charanpreet Arora (Clinical research  
46 associate)  
47

### 48 49 **DEFEAT COVID Investigators:**

50 Ashford and St Peter's Hospital NHS Foundation Trust, Ashford, UK: Shashank Sharma, Megan McGee,  
51 Kieran Brack, Maia Aquino, Rita Pereira, Vicky Frost, Kirsty, Gibson, Maria Croft, Fatima Omar, Kapila  
52 Ranasinghe,  
53

54 Kingston Hospital NHS Foundation Trust, Kingston upon Thames, UK: Siva Mahendran, Anna Joseph, Maggie  
55 Grout  
56

57 Max Hospital, New Delhi India: Arun Dewan, Ritesh Aggarwal

58 Meditrina Institute, Nagpur, India: Ajay Bulle

59 Noble Hospital, Pune, India: Aparna Kodre  
60

**Authors' contributions**

All designated authors meet all four ICMJE criteria for authorship. The funders and the sponsor of the study had no role in the analyses or the interpretation of the results.

ZC, NM, HLL, SRKS, LL, JB, SL, IJ, DF and PS made substantial contribution to the conception and design of the study. SS, AK, AB, RA, KB, MM, KR, FO, KL, AL, SRKS, JB, HLL, NM, IKH and ZC made substantial contribution to the acquisition, analysis and interpretation of the data for the study. All authors contributed to the drafting, revision and final approval of the manuscript. ZC, NM and LL are responsible for the overall content.

**Competing interests**

All authors have completed the ICMJE uniform disclosure form at [www.icmje.org/disclosure-of-interest/](http://www.icmje.org/disclosure-of-interest/) and declare no competing interests.

**Dissemination**

A summary of the results will be disseminated to the participants by principal investigators at each trial site via a newsletter.

**Licencing Statement**

The Submitting Author has the right to grant and does grant on behalf of all authors of the Work (as defined in the author licence), an exclusive licence and/or a non-exclusive licence for contributions from authors who are: i) UK Crown employees; ii) where BMJ has agreed a CC-BY licence shall apply, and/or iii) in accordance with the terms applicable for US Federal Government officers or employees acting as part of their official duties; on a worldwide, perpetual, irrevocable, royalty-free basis to BMJ Publishing Group Ltd ("BMJ") its licensees.

**Funding**

This work was supported by LifeArc, a UK registered charity number 1015243 (Grant number not applicable).



## References

1. <https://COVID19.who.int/>
2. Chen YL, Quach TTT, COVID-19 cytokine storm syndrome: a threshold concept. *Lancet Microbe*. 2021 Feb;2(2):e49-e50.doi: 10.1016/S2666-5247(20)30223-8.Epub 2021 Feb 2
3. Gavriatopoulou M, Ntanasis-Stathopoulos I, Korompoki E, Fotiou D, Migkou M, Tzanninis IG, Psaltopoulou T, Kastritis E, Terpos E, Dimopoulos MA. Emerging treatment strategies for COVID-19 infection. *Clin Exp Med*. 2021 May;21(2):167-179. doi: 10.1007/s10238-020-00671-y. Epub 2020 Oct 30. PMID: 33128197; PMCID: PMC759894
4. Dwek, Raymond A et al. "Targeting glycosylation as a therapeutic approach." *Nature reviews. Drug discovery* vol. 1,1 (2002): 65-75. doi:10.1038/nrd708
5. Angus, Derek C et al. "The REMAP-CAP (Randomized Embedded Multifactorial Adaptive Platform for Community-acquired Pneumonia) Study. Rationale and Design." *Annals of the American Thoracic Society* vol. 17,7 (2020): 879-891. doi:10.1513/AnnalsATS.202003-192SD
6. Alfaro-Lara, et al. Systematic review and meta-analysis of the efficacy and safety of leflunomide and methotrexate in the treatment of rheumatoid arthritis. *Reumatol Clin*. 2019 May - Jun;15(3):133-1
7. Xiong R, Zhang L, Li S, Sun Y, Ding M, Wang Y, Zhao Y, Wu Y, Shang W, Jiang X, Shan J, Shen Z, Tong Y, Xu L, Chen Y, Liu Y, Zou G, Lavillete D, Zhao Z, Wang R, Zhu L, Xiao G, Lan K, Li H, Xu K. Novel and potent inhibitors targeting DHODH are broad-spectrum antivirals against RNA viruses including newly-emerged coronavirus SARS-CoV-2. *Protein Cell*. 2020 Oct;11(10):723-739. doi: 10.1007/s13238-020-00768-w. Epub 2020 Aug 4. Erratum in: *Protein Cell*. 2021 Jan;12(1):76-80. Erratum in: *Protein Cell*. 2020 Nov 9;: PMID: 32754890; PMCID: PMC7402641.
8. Yao, H. W.; Li, J.; Chen, J. Q.; Xu, S. Y. A 771726, the active metabolite of leflunomide, inhibits TNF- $\alpha$  and IL-1 from Kupffer cells. *Inflammation* 2004, 28 (2), 97-103.
9. Li, L. et al. The effects of teriflunomide on lymphocyte subpopulations in human peripheral blood mononuclear cells in vitro. *J. Neuroimmunol*. 2013, 265 (1-2), 82-90.
10. <https://www.rcplondon.ac.uk/projects/outputs/national-early-warning-score-news-2>
11. [https://ctep.cancer.gov/protocoldevelopment/electronic\\_applications/ctc.htm#ctc\\_60](https://ctep.cancer.gov/protocoldevelopment/electronic_applications/ctc.htm#ctc_60)
12. Mandal S, Barnett J, Brill SE ARC Study Group, et al. 'Long-COVID': a cross-sectional study of persisting symptoms, biomarker and imaging abnormalities following hospitalisation for COVID-19. *Thorax* 2021;76:396-398.
13. <http://www.who.int/blueprint/priority-diseases/key-action/novel-coronavirus/en/>.
14. Machin D, Campbell M, Fayers, P, Pinol A (1997) *Sample Size Tables for Clinical Studies*. Second Ed. Blackwell Science IBSN 0-86542-870-0 p. 176-177
15. Hu, Ke et al. "A Small-Scale Medication of Leflunomide as a Treatment of COVID-19 in an Open-Label Blank-Controlled Clinical Trial." *Virologica Sinica* vol. 35,6 (2020): 725-733. doi:10.1007/s12250-020-00258-7
16. Wang, Qiang et al. "Efficacy and Safety of Leflunomide for Refractory COVID-19: A Pilot Study." *Frontiers in pharmacology* vol. 12 581833. 2 Jul. 2021, doi:10.3389/fphar.2021.581833

17. Mengmei Wang, Yang Zhao, Weihua Hu, Dong Zhao, Yunting Zhang, Tao Wang, Zhishui Zheng, Xiaochen Li, Shaolin Zeng, Zhenlian Liu. Treatment of Coronavirus Disease 2019 Patients With Prolonged Postsymptomatic Viral Shedding With Leflunomide: A Single-center Randomized Controlled Clinical Trial. *Clinical Infectious Diseases*, Volume 73, Issue 11, 1 December 2021, Pages e4012–e4019, <https://doi.org/10.1093/cid/ciaa1417>
18. Huang, Chaolin et al. “Clinical features of patients infected with 2019 novel coronavirus in Wuhan, China.” *Lancet* (London, England) vol. 395,10223 (2020): 497-506. doi:10.1016/S0140-6736(20)30183-5
19. ISARIC Clinical Characterisation Group. “COVID-19 symptoms at hospital admission vary with age and sex: ISARIC multinational study.” medRxiv : the preprint server for health sciences 2020.10.26.20219519. 19 Nov. 2020, doi:10.1101/2020.10.26.20219519. Preprint.
20. REMAP-CAP Investigators et al. “Interleukin-6 Receptor Antagonists in Critically Ill Patients with COVID-19.” *The New England journal of medicine* vol. 384,16 (2021): 1491-1502. doi:10.1056/NEJMoa2100433
21. Abani, O., Abbas, A., Abbas, F., Abbas, M., Abbasi, S., Abbass, H., et al. (2021). Tocilizumab in Patients Admitted to Hospital with COVID-19 (RECOVERY): a Randomised, Controlled, Open-Label, Platform Trial. *The Lancet* 397, 1637–1645. doi:10.1016/S0140-6736(21)00676-0
22. Chakravarty EF, Sanchez-Yamamoto D, Bush TM. The use of disease modifying antirheumatic drugs in women with rheumatoid arthritis of childbearing age: a survey of practice pattern and pregnancy outcomes. *J Rheumatol*. 2003;30:241–6.
23. Atsushi Ogata, Yasuhiro Kato, Shinji Higa, Kazuyuki Yoshizaki, IL-6 inhibitor for the treatment of rheumatoid arthritis: A comprehensive review, *Modern Rheumatology*, Volume 29, Issue 2, 4 March 2019, Pages 258–267, <https://doi.org/10.1080/14397595.2018.1546357>
24. WHO Rapid Evidence Appraisal for COVID-19 Therapies (REACT) Working Group et al. “Association Between Administration of Systemic Corticosteroids and Mortality Among Critically Ill Patients With COVID-19: A Meta-analysis.” *JAMA* vol. 324,13 (2020): 1330-1341. doi:10.1001/jama.2020.17023
25. Kraan MC, Smeets TJM, van Loon MJ, et al Differential effects of leflunomide and methotrexate on cytokine production in rheumatoid arthritis *Annals of the Rheumatic Diseases* 2004;63:1056-1061.
26. Wang, Shihang et al. “Molecular evolutionary characteristics of SARS-CoV-2 emerging in the United States.” *Journal of medical virology* vol. 94,1 (2022): 310-317. doi:10.1002/jmv.27331



## Figure legends:

**Figure 1: Randomisation, treatment assignment and follow up of DEFEAT-COVID study participant.**

*\*= immunotherapy included Tocilizumab, Bevacizumab and Interferon alpha and beta.*

**Figure 2: Time to clinical improvement of 2 points on a clinical status scale or discharge prior 28 day in a stratified ITT analysis (primary outcome).**

*Patients who died were censored at the time their death occurred, while all surviving patients who did not reach TICI criteria by day 28 were right censored at that point. Most of the patients were discharged within the first 10 days of admission.*

**Figure 3: Cumulative all-cause mortality (A), oxygen dependence (B) by 28 days**

**Figure 4: Mean changes in  $\log^{10}$  viral load (copies/ml) from baseline.**

*Error bars represent standard error. Numbers in the bars represent the number of samples available for measurements.*

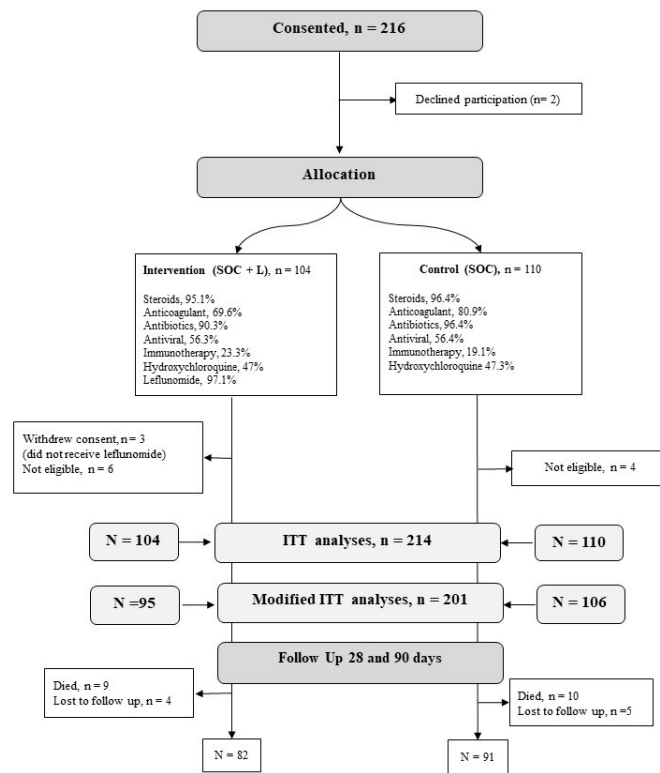

Randomisation, treatment assignment and follow up of DEFEAT-COVID study participant.  
 \*= immunotherapy included Tocilizumab, Bevacizumab and Interferon alpha and beta.

190x338mm (96 x 96 DPI)

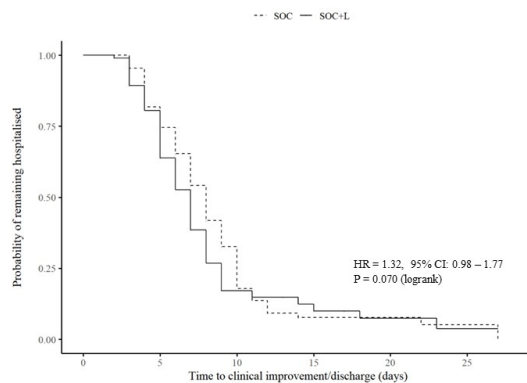

|       |     |    |    |    |   |   |
|-------|-----|----|----|----|---|---|
| SOC   | 110 | 90 | 31 | 4  | 3 | 1 |
| SOC+L | 104 | 82 | 15 | 10 | 3 | 1 |

Patients who died were censored at the time their death occurred, while all surviving patients who did not reach TICI criteria by day 28 were right censored at that point. Most of the patients were discharged within the first 10 days of admission.

338x190mm (96 x 96 DPI)

A)

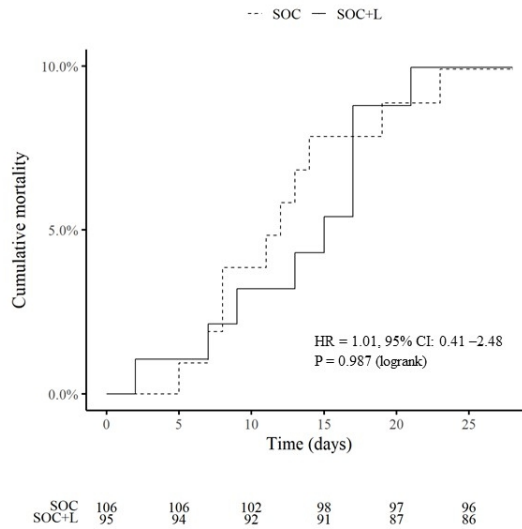

B)

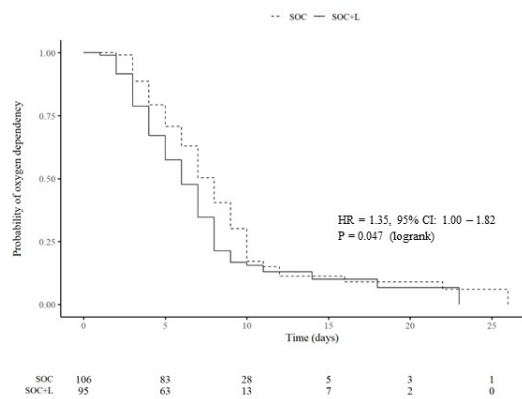

Cumulative all-cause mortality (A), oxygen dependence (B) by 28 days

190x338mm (96 x 96 DPI)

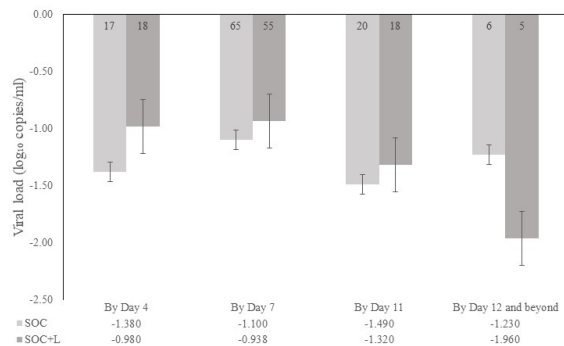

Mean changes in log<sub>10</sub> viral load (copies/ml) from baseline. Error bars represent standard error. Numbers in the bars represent the number of samples available for measurements.

338x190mm (96 x 96 DPI)

| Trial procedures                                                                                         | Screening | Day 0/1 (BL) | Daily          | Day 3          | Day 7 | Day 11 +/- 1 | Day 15 +/- 1 | Day 28 +/- 1   | DC             | Day 90 +/- 7   |
|----------------------------------------------------------------------------------------------------------|-----------|--------------|----------------|----------------|-------|--------------|--------------|----------------|----------------|----------------|
| Confirmation of COVID Infection and severity                                                             | X         |              |                |                |       |              |              |                |                |                |
| Informed consent & Eligibility Assessment                                                                | X         |              |                |                |       |              |              |                |                |                |
| Demographics, Medical Hx, Cardiopulmonary Assessment (including ECG <sup>1</sup> & Echo <sup>2</sup> )   | X         |              |                |                |       |              |              |                |                |                |
| Concomitant medication                                                                                   |           | X            | X              |                |       |              |              | X <sup>7</sup> |                | X              |
| Bloods – FBC, U&Es, LFT (AST <sup>6</sup> & ALT <sup>6</sup> )                                           |           | X            | X <sup>5</sup> | X <sup>6</sup> |       |              |              |                | X              |                |
| – Clotting screen, Fibrinogen, D-Dimer, Ferritin                                                         |           | X            | X <sup>5</sup> |                |       |              |              |                |                |                |
| – Glucose                                                                                                |           | X            | X <sup>5</sup> |                |       |              |              |                |                |                |
| – Creatine Kinase, Troponin, BNP (NT-proBNP)                                                             |           | X            | X <sup>5</sup> |                |       |              |              |                |                |                |
| – Procalcitonin, CRP, LDH                                                                                |           | X            | X <sup>5</sup> | X              |       | X            |              |                |                |                |
| – HIV                                                                                                    |           | X            |                |                |       |              |              |                |                |                |
| – Cytokine profile                                                                                       |           | X            |                | X              |       | X            |              |                | X <sup>8</sup> |                |
| Pregnancy test (urine sample)                                                                            |           | X            |                |                |       |              |              |                |                |                |
| Viral Load (nasopharyngeal swab)                                                                         |           | X            |                |                | X     | X            | X            | X              | X <sup>8</sup> |                |
| Randomisation                                                                                            |           | X            |                |                |       |              |              |                |                |                |
| IMP dispense, loading (daily from Day 0/1 to 3) / maintenance dose (daily from Day 4 to 10) <sup>3</sup> |           | X            |                |                |       |              |              |                |                |                |
| Primary outcome assessment (TTCI)                                                                        |           | X            | X              |                |       |              |              | X <sup>7</sup> |                |                |
| Clinical Assessment, e.g. NEWS 2, body T°C*, vital signs, imaging**                                      | X         | X            | X <sup>5</sup> |                |       |              |              |                |                |                |
| *Blood and Urine cultures (in presence of fever)                                                         |           | X            | X <sup>5</sup> |                |       |              |              |                |                |                |
| **Urine for legionella and pneumococcal                                                                  |           | X            | X <sup>5</sup> |                |       |              |              |                |                |                |
| Oxygenation assessment e.g. O <sub>2</sub> delivery method and level [SpO <sub>2</sub> ]                 |           | X            | X <sup>5</sup> |                |       |              |              |                |                |                |
| Arterial Blood Gas (ABG) – as available and where applicable                                             |           | X            | X <sup>5</sup> |                |       |              |              |                |                |                |
| Serious Adverse Event(s) (SAE(s))/ Adverse Event(s) (AE(s)) <sup>4</sup>                                 |           |              | X              |                |       |              |              | X <sup>7</sup> |                | X <sup>9</sup> |
| Out-patient assessment (telephone call)                                                                  |           |              |                |                |       |              |              | X <sup>7</sup> |                | X              |

### Data collected and study time points

**Key:** BL – Baseline; IMP – Investigation Medicinal Product (trial treatment i.e. trial drug); SOC - Standard of Care; DC Discharge.

**Notes:** **1.** Check medical notes, if abnormal flag repeat imaging; **2.** Echo within 6 months to be used if no cardiac symptoms; **3.** Participant to take home IMP if DC'd; **4.** Participant to self-report events between DC to Day 90; **5.** Completed Daily, depending on clinical need and resources. If participant is DC'd early – record what is available as part of SOC; **6.** AST/ALT *must* be checked for treatment arm to determine maintenance dose; **7.** Participant DC'd called on Day 28 for Treatment Assessments, if not seen on-site; **8.** Cytokines/Viral Load to be collected if outside of scheduled collection. Day 11 is the last collection for Cytokines. on DC Medium (telephone call) and long term (by Sponsor) Treatment Assessments respectively.

1  
2  
3  
4  
5  
6  
7  
8  
9  
10  
11  
12  
13  
14  
15  
16  
17  
18  
19  
20  
21  
22  
23  
24  
25  
26  
27  
28  
29  
30  
31  
32  
33  
34  
35  
36  
37  
38  
39  
40  
41  
42  
43  
44  
45  
46  
47  
48  
49  
50  
51  
52  
53  
54  
55  
56  
57  
58  
59  
60

| Centre      | Group        | N   | Corticosteroid | Anticoagulant | Antiviral | Antibiotic | Immunotherapy* | Hydroxychloroquine |
|-------------|--------------|-----|----------------|---------------|-----------|------------|----------------|--------------------|
| UK          | Intervention | 30  | 100%           | 97%           | 69%       | 100%       | 14%            | 3%                 |
|             | Control      | 36  | 100%           | 100%          | 81%       | 100%       | 3%             | 3%                 |
| India       | Intervention | 74  | 87%            | 76%           | 70%       | 76%        | 67%            | 93%                |
|             | Control      | 74  | 89%            | 84%           | 70%       | 88%        | 50%            | 94%                |
| All Centres | Intervention | 104 | 95%            | 79%           | 56%       | 90%        | 23%            | 47%                |
|             | Control      | 110 | 96%            | 80%           | 56%       | 96%        | 19%            | 47%                |

**Supplementary Table 1: Standard of care therapy in the UK and India**

*\*The "Immunotherapy" includes tocilizumab, bevacizumab, interferon alpha and beta*

| Adverse events categorised per MedDRA terminology   |                    |                  |
|-----------------------------------------------------|--------------------|------------------|
|                                                     | SOC+L<br>(n = 104) | SOC<br>(n = 110) |
| Patients with at least one reported AE, n (%)       | 56 (53.8%)         | 42 (38.2%)       |
| All adverse events, n                               | 121                | 91               |
| Blood and lymphatic system disorder                 |                    |                  |
| - DIC                                               | 1                  | 4                |
| - Lymph node enlargement                            | 1                  | 0                |
| - Hilar lymphadenopathy                             | 1                  | 0                |
| - Thrombocytopenia                                  | 4                  | 4                |
| - Neutropenia                                       | 0                  | 1                |
| - Splenomegaly                                      | 1                  | 0                |
| Cardiac Disorder                                    |                    |                  |
| - Acute coronary syndrome                           | 2                  | 1                |
| - Aortic Valve disease                              | 2                  | 0                |
| - Atrial fibrillation                               | 2                  | 5                |
| - Chest pain                                        | 1                  | 0                |
| - Left ventricular systolic dysfunction             | 1                  | 0                |
| - Conduction disorder                               | 0                  | 1                |
| - Infective endocarditis                            | 1                  | 0                |
| - Tachycardia (sinus)                               | 2                  | 0                |
| Endocrine disorder                                  |                    |                  |
| - Adrenal adenoma                                   | 1                  | 0                |
| Eye disorder                                        |                    |                  |
| - Dry eye                                           | 0                  | 1                |
| General disorders and administration site condition |                    |                  |
| - Lethargy                                          | 1                  | 0                |
| Gastrointestinal disorders                          |                    |                  |
| - Diarrhoea                                         | 1                  | 1                |
| - Gastritis                                         | 1                  | 0                |
| - Gastric haemorrhage                               | 2                  | 0                |



|                                                |    |    |
|------------------------------------------------|----|----|
| - Hiatus hernia                                | 1  | 0  |
| - Rectal haemorrhage                           | 0  | 1  |
| - Mucositis oral                               | 1  | 0  |
| - Dyspepsia                                    | 2  | 0  |
| - Emesis                                       | 1  | 0  |
| Hepatobiliary disorders                        |    |    |
| - Acute liver dysfunction                      | 1  | 1  |
| - Cholelithiasis                               | 2  | 0  |
| - Hepatic granuloma                            | 1  | 0  |
| - Liver steatosis                              | 1  | 0  |
| Infection and infestations                     |    |    |
| - Sepsis                                       | 0  | 1  |
| Investigation                                  |    |    |
| - APTT prolonged                               | 1  | 0  |
| - ALP increased                                | 1  | 0  |
| - Bil increased                                | 3  | 0  |
| - Il-6 increased                               | 1  | 0  |
| - Leucocytosis                                 | 1  | 2  |
| - ALT/AST increased                            | 27 | 12 |
| - Sgot increased                               | 2  | 0  |
| Metabolism and nutrition disorder              |    |    |
| - Hyperglycaemia                               | 2  | 6  |
| - Hyperkalaemia                                | 0  | 1  |
| - Hyponatraemia                                | 1  | 1  |
| - hypomagnesaemia                              | 0  | 1  |
| Musculoskeletal and connective tissue disorder |    |    |
| - Discitis                                     | 1  | 0  |
| Neoplasms                                      |    |    |
| - Lung cancer                                  | 1  | 0  |
| Nervous system disorder                        |    |    |
| - 6 <sup>th</sup> nerve palsy                  | 0  | 1  |

|                                                |   |   |
|------------------------------------------------|---|---|
| - Dysphasia                                    | 0 | 1 |
| - Cognitive disturbances                       | 1 | 0 |
| - Cerebellar calcification                     | 0 | 1 |
| - Lower limb weakness                          | 1 | 0 |
| - Dysphagia                                    | 0 | 1 |
| - Hemiparesis                                  | 0 | 1 |
| - Headache                                     | 1 | 0 |
| - Intracranial haemorrhage                     | 0 | 1 |
| Psychiatric disorders                          |   |   |
| - Anxiety                                      | 2 | 1 |
| - Delirium                                     | 0 | 2 |
| Renal and urinary disorders                    |   |   |
| - Acute kidney injury                          | 5 | 5 |
| - Haematuria                                   | 1 | 0 |
| - Urinary urgency                              | 1 | 0 |
| Respiratory thoracic and mediastinal disorders |   |   |
| - ARDS                                         |   |   |
| - Wheezing                                     | 1 | 0 |
| - Atelectasis                                  | 0 | 1 |
| - Hypoxia                                      | 0 | 1 |
| - Exacerbation of COPD                         | 5 | 7 |
| - Hoarseness                                   | 3 | 2 |
| - Dyspnoea                                     | 0 | 1 |
| - Pneumonitis                                  | 4 | 3 |
| - Epistaxis                                    | 1 | 0 |
| - Haemoptysis                                  | 3 | 1 |
| - Respiratory failure                          | 0 | 1 |
| - Pneumothorax                                 | 2 | 0 |
| - (subcutaneous emphysema)                     | 0 | 1 |
|                                                | 0 | 1 |
| Reproductive system and breast disorders       |   |   |
| - Endometrium thickening                       | 1 | 0 |

|                                 |   |    |
|---------------------------------|---|----|
| Surgical and medical procedures |   |    |
| - Aortic valve replacement      | 1 | 0  |
| - Loop recorder implant         | 0 | 1  |
| Vascular disorder               |   |    |
| - Aortic aneurysm               | 1 | 0  |
| - Thromboembolic events         |   |    |
| ○ DVT                           | 1 | 0  |
| ○ Bilateral pedal vasculopathy  | 0 | 1  |
| ○ Pulmonary embolism            | 1 | 1  |
| - Hypertension                  | 0 | 1  |
| Death                           | 9 | 10 |

**Supplementary Table 2: All adverse events**

|                                                             |                         | Baseline      |            | Day 1 – 3/4      |            | Day 4/5 – Discharge |            |
|-------------------------------------------------------------|-------------------------|---------------|------------|------------------|------------|---------------------|------------|
|                                                             |                         | UK            | India      | UK               | India      | UK                  | India      |
| <b>ALT</b>                                                  |                         |               |            |                  |            |                     |            |
| <b>SOC + L</b>                                              | <b>Median (IQR) U/L</b> | 48 (30-60)    |            | 67 (36-87)       |            | 44 (36-71)          |            |
|                                                             |                         | 48 (32-71)    | 47 (29-59) | 59 (37-94)       | 72 (34-86) | 62(34-151)          | 42(35-56)  |
|                                                             | <b>1 - 2 x ULN (n)</b>  | 44            |            | 50               |            | 17                  |            |
|                                                             |                         | 12            | 32         | 9                | 41         | 4                   | 13         |
|                                                             | <b>2 - 3 x ULN (n)</b>  | 1             |            | 6                |            | 6                   |            |
|                                                             |                         | 1             | 0          | 3                | 3          | 2                   | 4          |
|                                                             | <b>&gt; 3 x ULN (n)</b> | 1             |            | 8                |            | 5                   |            |
|                                                             |                         | 1             | 0          | 3                | 5          | 4                   | 1          |
|                                                             | <b>&gt;ULN</b>          | 14            |            | 49               |            | 18                  |            |
|                                                             |                         |               |            |                  |            |                     |            |
| <b>SOC</b>                                                  | <b>Median (IQR) U/L</b> | 39 (26-56)    |            | 44 (34-65)       |            | 41 (35-52)          |            |
|                                                             |                         | 40 (27-59)    | 38 (25-54) | 44 (31-63)       | 44 (36-67) | 49 (33-63)          | 40 (35-52) |
|                                                             | <b>1 - 2 x ULN (n)</b>  | 33            |            | 29               |            | 24                  |            |
|                                                             |                         | 13            | 20         | 8                | 21         | 7                   | 17         |
|                                                             | <b>2 - 3 x ULN (n)</b>  | 0             |            | 9                |            | 3                   |            |
|                                                             |                         | 0             | 0          | 2                | 7          | 2                   | 1          |
|                                                             | <b>&gt;3 x ULN (n)</b>  | 0             |            | 0                |            | 0                   |            |
|                                                             |                         | 0             | 0          | 0                | 0          | 0                   | 0          |
|                                                             | <b>&gt;ULN</b>          | 13            |            | 28               |            | 18                  |            |
|                                                             |                         |               |            |                  |            |                     |            |
| <b>p value of abnormal ALT counts between SOC+L and SOC</b> |                         | <b>0.049</b>  |            | <b>&lt;0.001</b> |            | <b>0.633</b>        |            |
| <b>AST</b>                                                  |                         |               |            |                  |            |                     |            |
| <b>SOC + L</b>                                              | <b>Median (IQR) U/L</b> | 44 (30-54)    |            | 55(31-77)        |            | 41(27-50)           |            |
|                                                             |                         | 60 (42-102)   | 43(29-50)  | 58 (42-104)      | 53 (28-76) | 54 (29-102)         | 40 (27-49) |
|                                                             | <b>1 - 2 x ULN (n)</b>  | 28            |            | 36               |            | 18                  |            |
|                                                             |                         | 4             | 24         | 8                | 28         | 3                   | 15         |
|                                                             | <b>2 - 3 x ULN (n)</b>  | 2             |            | 9                |            | 1                   |            |
|                                                             |                         | 2             | 0          | 2                | 7          | 1                   | 0          |
|                                                             | <b>&gt; 3 x ULN (n)</b> | 1             |            | 6                |            | 1                   |            |
|                                                             |                         | 1             | 0          | 2                | 4          | 1                   | 0          |
|                                                             | <b>&gt;ULN</b>          | 7             |            | 39               |            | 15                  |            |
|                                                             |                         |               |            |                  |            |                     |            |
| <b>SOC</b>                                                  | <b>Median (IQR) U/L</b> | 39 (28-52)    |            | 39 (29-54)       |            | 37(27-47)           |            |
|                                                             |                         | 57 (34-75)    | 37(26-48)  | 45(38-55)        | 38(28-54)  | 45 (35-61)          | 37 (25-46) |
|                                                             | <b>1 - 2 x ULN (n)</b>  | 22            |            | 18               |            | 16                  |            |
|                                                             |                         | 6             | 16         | 4                | 14         | 4                   | 12         |
|                                                             | <b>2 - 3 x ULN (n)</b>  | 2             |            | 5                |            | 0                   |            |
|                                                             |                         | 2             | 0          | 0                | 5          | 0                   | 0          |
|                                                             | <b>&gt;3 x ULN (n)</b>  | 0             |            | 1                |            | 1                   |            |
|                                                             |                         | 0             | 0          | 0                | 1          | 1                   | 0          |
|                                                             | <b>&gt;ULN</b>          | 8             |            | 20               |            | 12                  |            |
|                                                             |                         |               |            |                  |            |                     |            |
| <b>p value of abnormal ALT counts between SOC+L and SOC</b> |                         | <b>0.3222</b> |            | <b>&lt;0.001</b> |            | <b>0.318</b>        |            |

**Supplementary Table 3: Liver enzymes measurements**

ULN: upper limits of normal (ALT: 10-49 U/L; AST 19 – 48U/L). ALT: alanine transaminase. AST: aspartate transaminase; SOC + L: n = 30 UK, 74 India; SOC: n = 36 UK, 74 India

1  
2  
3  
4  
5  
6  
7  
8  
9  
10  
11  
12  
13  
14  
15  
16  
17  
18  
19  
20  
21  
22  
23  
24  
25  
26  
27  
28  
29  
30  
31  
32  
33  
34  
35  
36  
37  
38  
39  
40  
41  
42  
43  
44  
45  
46  
47  
48  
49  
50  
51  
52  
53  
54  
55  
56  
57  
58  
59  
60

|                           | Day 28          |                 |               |                 |       | Day 90          |                 |               |                 |    |
|---------------------------|-----------------|-----------------|---------------|-----------------|-------|-----------------|-----------------|---------------|-----------------|----|
|                           | SOC+L<br>(n=81) |                 | SOC<br>(n=91) |                 | p*    | SOC+L<br>(n=81) |                 | SOC<br>(n=91) |                 | p* |
|                           | %               | Median<br>(IQR) | %             | Median (IQR)    |       | %               | Median (IQR)    | %             | Median (IQR)    |    |
| <b>Fatigue</b>            | 29.6            | 5.00(2.75-8.00) | 31.9          | 5.00(3.00-8.00) | 0.751 | 22.2            | 5.00(3.25-7.00) | 26.4          | 3.00(2.00-4.25) | NS |
| <b>Cough</b>              | 13.6            | 2.00(1.00-4.50) | 18.7          | 2.00(1.00-4.00) | 0.366 | 7.41            | 1.00(1.00-6.25) | 8.79          | 2.50(1.00-3.50) | NS |
| <b>Anxiety</b>            | 24.7            | 3.50(2.00-7.25) | 19.8          | 4.00(3.00-7.75) | 0.438 | 21.0            | 3.00(1.00-5.00) | 19.8          | 2.00(1.00-3.75) | NS |
| <b>Chest pains</b>        | 11.1            | 4.00(2.00-7.00) | 8.79          | 4.00(2.50-5.00) | 0.611 | 7.41            | 4.00(3.25-7.75) | 6.59          | 3.00(1.25-7.75) | NS |
| <b>Brain fog</b>          | 14.8            | 5.00(3.75-7.25) | 16.5          | 5.00(1.50-7.00) | 0.764 | 14.8            | 3.50(1.75-5.00) | 12.1          | 4.00(2.50-4.50) | NS |
| <b>Breathlessness</b>     | 40.7            | 2.00(1.00-6.00) | 42.9          | 1.00(1.00-7.00) | 0.779 | 22.2            | 5.00(1.00-7.00) | 20.9          | 4.00(2.00-4.00) | NS |
| <b>Sleep quality</b>      | 48.2            | 2.00(1.00-5.00) | 38.5          | 3.00(1.00-6.00) | 0.200 | 34.6            | 2.00(1.00-4.25) | 33.0          | 2.50(1.00-5.75) | NS |
| <b>Palpitations</b>       | 8.64            | 7.00(1.50-9.00) | 5.49          | 1.00(1.00-7.00) | 0.419 | 4.94            | 4.50(3.50-5.00) | 3.30          | 1.00(1.00-4.00) | NS |
| <b>Joint pain</b>         | 32.1            | 3.00(1.00-4.75) | 33.0          | 2.00(1.00-4.00) | 0.903 | 22.2            | 3.50(2.00-7.00) | 19.8          | 2.00(2.00-4.50) | NS |
| <b>Myalgia</b>            | 18.5            | -               | 19.8          |                 | 0.834 | 17.3            |                 | 11.0          |                 | NS |
| <b>Anosmia</b>            | 6.17            | -               | 11.0          |                 | 0.264 | 2.47            |                 | -             |                 | -  |
| <b>Loss of taste</b>      | 9.88            | -               | 14.3          |                 | 0.378 | 7.41            |                 | -             |                 | -  |
| <b>Depression</b>         | 19.8            | 1.50(1.00-3.00) | 18.7          | 1.00(1.00-2.00) | 0.859 | 11.1            | 1.00(1.00-1.00) | 11.0          | 1.00(1.00-2.00) | NS |
| <b>Loss of interest</b>   | 12.4            | 2.50(1.25-3.00) | 16.5          | 1.00(1.00-3.00) | 0.442 | 9.88            | 1.00(1.00-1.25) | 7.69          | 1.00(1.00-2.50) | NS |
| <b>Dyspnoea; Mild (1)</b> | 59.3            | 1.00(1.00-2.00) | 47.3          | 2.00(1.00-2.00) | 0.155 | 80.3            | 1.00(1.00-1.00) | 81.3          | 1.00(1.00-1.00) | NS |
| <b>Moderate (2-3)</b>     | 29.6            |                 | 39.6          |                 | 0.173 | 14.8            |                 | 17.6          |                 |    |
| <b>Severe (4-5)</b>       | 11.1            |                 | 13.2          |                 | 0.678 | 4.94            |                 | 1.10          |                 |    |

#### Supplementary Table 4: Long COVID symptoms at 28 and 90 days after randomisation

*p*: alpha value. Statistical significance was assumed at 0.05 alpha value. To best summarise the data, symptom scales (e.g. 0-10) for all symptoms (except dyspnoea, which was measured in different terms) were binarized, accepting any score above 0 as prevalence (%) of experiencing that symptom. To reflect magnitude of symptom severity, median (IQR) of individual symptom scores (except for dyspnoea, myalgia, anosmia and loss of taste) were taken excluding scores of 0. For dyspnoea, prevalence (%) of the symptom was determined as the proportion of patients scoring any relevant category (e.g., mild, moderate, severe), and median (IQR) of symptom severity included all score values. Between-group differences at each point of follow-up (day 28 and day 90) for all symptoms were evaluated using patient proportions from the binarized symptom scales via the chi-square test of differences. The Shapiro-wilk test was used to assess statistical normality. No analysis was enabled for any day reporting  $n \leq 3$  datapoints per group for statistical reliability

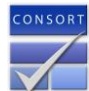

## CONSORT 2010 checklist of information to include when reporting a randomised trial\*

| Section/Topic                    | Item No | Checklist item                                                                                                                                                                              | Reported on page No |
|----------------------------------|---------|---------------------------------------------------------------------------------------------------------------------------------------------------------------------------------------------|---------------------|
| <b>Title and abstract</b>        |         |                                                                                                                                                                                             |                     |
|                                  | 1a      | Identification as a randomised trial in the title                                                                                                                                           | 1                   |
|                                  | 1b      | Structured summary of trial design, methods, results, and conclusions (for specific guidance see CONSORT for abstracts)                                                                     | 2                   |
| <b>Introduction</b>              |         |                                                                                                                                                                                             |                     |
| Background and objectives        | 2a      | Scientific background and explanation of rationale                                                                                                                                          | 4,5,6               |
|                                  | 2b      | Specific objectives or hypotheses                                                                                                                                                           | 5,6                 |
| <b>Methods</b>                   |         |                                                                                                                                                                                             |                     |
| Trial design                     | 3a      | Description of trial design (such as parallel, factorial) including allocation ratio                                                                                                        | 4,5,6               |
|                                  | 3b      | Important changes to methods after trial commencement (such as eligibility criteria), with reasons                                                                                          | NA                  |
| Participants                     | 4a      | Eligibility criteria for participants                                                                                                                                                       | 4                   |
|                                  | 4b      | Settings and locations where the data were collected                                                                                                                                        | 4,5                 |
| Interventions                    | 5       | The interventions for each group with sufficient details to allow replication, including how and when they were actually administered                                                       | 5                   |
| Outcomes                         | 6a      | Completely defined pre-specified primary and secondary outcome measures, including how and when they were assessed                                                                          | 5,6,7               |
|                                  | 6b      | Any changes to trial outcomes after the trial commenced, with reasons                                                                                                                       | NA                  |
| Sample size                      | 7a      | How sample size was determined                                                                                                                                                              | 6                   |
|                                  | 7b      | When applicable, explanation of any interim analyses and stopping guidelines                                                                                                                | NA                  |
| <b>Randomisation:</b>            |         |                                                                                                                                                                                             |                     |
| Sequence generation              | 8a      | Method used to generate the random allocation sequence                                                                                                                                      | 4                   |
|                                  | 8b      | Type of randomisation; details of any restriction (such as blocking and block size)                                                                                                         | 5                   |
| Allocation concealment mechanism | 9       | Mechanism used to implement the random allocation sequence (such as sequentially numbered containers), describing any steps taken to conceal the sequence until interventions were assigned | NA                  |
| Implementation                   | 10      | Who generated the random allocation sequence, who enrolled participants, and who assigned participants to interventions                                                                     | 4,5                 |
| Blinding                         | 11a     | If done, who was blinded after assignment to interventions (for example, participants, care providers, those                                                                                | NA                  |

|                                                      |     |                                                                                                                                                   |                  |
|------------------------------------------------------|-----|---------------------------------------------------------------------------------------------------------------------------------------------------|------------------|
|                                                      |     | assessing outcomes) and how                                                                                                                       |                  |
|                                                      | 11b | If relevant, description of the similarity of interventions                                                                                       | NA               |
| Statistical methods                                  | 12a | Statistical methods used to compare groups for primary and secondary outcomes                                                                     | 5,6              |
|                                                      | 12b | Methods for additional analyses, such as subgroup analyses and adjusted analyses                                                                  | 5,6              |
| <b>Results</b>                                       |     |                                                                                                                                                   |                  |
| Participant flow (a diagram is strongly recommended) | 13a | For each group, the numbers of participants who were randomly assigned, received intended treatment, and were analysed for the primary outcome    | Figure 1, page 7 |
|                                                      | 13b | For each group, losses and exclusions after randomisation, together with reasons                                                                  | Figure 1, page 7 |
| Recruitment                                          | 14a | Dates defining the periods of recruitment and follow-up                                                                                           | 7                |
|                                                      | 14b | Why the trial ended or was stopped                                                                                                                | NA               |
| Baseline data                                        | 15  | A table showing baseline demographic and clinical characteristics for each group                                                                  | Table 1          |
| Numbers analysed                                     | 16  | For each group, number of participants (denominator) included in each analysis and whether the analysis was by original assigned groups           | 7, Figure 1      |
| Outcomes and estimation                              | 17a | For each primary and secondary outcome, results for each group, and the estimated effect size and its precision (such as 95% confidence interval) | 5,6              |
|                                                      | 17b | For binary outcomes, presentation of both absolute and relative effect sizes is recommended                                                       | 5,6              |
| Ancillary analyses                                   | 18  | Results of any other analyses performed, including subgroup analyses and adjusted analyses, distinguishing pre-specified from exploratory         | 5,6,7,8,9        |
| Harms                                                | 19  | All important harms or unintended effects in each group (for specific guidance see CONSORT for harms)                                             | NA               |
| <b>Discussion</b>                                    |     |                                                                                                                                                   |                  |
| Limitations                                          | 20  | Trial limitations, addressing sources of potential bias, imprecision, and, if relevant, multiplicity of analyses                                  | 12               |
| Generalisability                                     | 21  | Generalisability (external validity, applicability) of the trial findings                                                                         |                  |
| Interpretation                                       | 22  | Interpretation consistent with results, balancing benefits and harms, and considering other relevant evidence                                     | 13               |
| <b>Other information</b>                             |     |                                                                                                                                                   |                  |
| Registration                                         | 23  | Registration number and name of trial registry                                                                                                    | 2                |
| Protocol                                             | 24  | Where the full trial protocol can be accessed, if available                                                                                       | NA               |
| Funding                                              | 25  | Sources of funding and other support (such as supply of drugs), role of funders                                                                   | 2,13             |

\*We strongly recommend reading this statement in conjunction with the CONSORT 2010 Explanation and Elaboration for important clarifications on all the items. If relevant, we also recommend reading CONSORT extensions for cluster randomised trials, non-inferiority and equivalence trials, non-pharmacological treatments, herbal interventions, and pragmatic trials. Additional extensions are forthcoming: for those and for up to date references relevant to this checklist, see [www.consort-statement.org](http://www.consort-statement.org).

# BMJ Open

## Leflunomide Treatment for Patients Hospitalised with COVID-19: DEFEAT-COVID Randomised Controlled Trial

|                                 |                                                                                                                                                                                                                                                                                                                                                                                                                                                                                                                                                                                                                                                                                                                                                                                                                                                                                                                                                                                                                                                                                                                                                                                                                                                                                                                      |
|---------------------------------|----------------------------------------------------------------------------------------------------------------------------------------------------------------------------------------------------------------------------------------------------------------------------------------------------------------------------------------------------------------------------------------------------------------------------------------------------------------------------------------------------------------------------------------------------------------------------------------------------------------------------------------------------------------------------------------------------------------------------------------------------------------------------------------------------------------------------------------------------------------------------------------------------------------------------------------------------------------------------------------------------------------------------------------------------------------------------------------------------------------------------------------------------------------------------------------------------------------------------------------------------------------------------------------------------------------------|
| Journal:                        | <i>BMJ Open</i>                                                                                                                                                                                                                                                                                                                                                                                                                                                                                                                                                                                                                                                                                                                                                                                                                                                                                                                                                                                                                                                                                                                                                                                                                                                                                                      |
| Manuscript ID                   | bmjopen-2022-068179.R2                                                                                                                                                                                                                                                                                                                                                                                                                                                                                                                                                                                                                                                                                                                                                                                                                                                                                                                                                                                                                                                                                                                                                                                                                                                                                               |
| Article Type:                   | Original research                                                                                                                                                                                                                                                                                                                                                                                                                                                                                                                                                                                                                                                                                                                                                                                                                                                                                                                                                                                                                                                                                                                                                                                                                                                                                                    |
| Date Submitted by the Author:   | 10-Mar-2023                                                                                                                                                                                                                                                                                                                                                                                                                                                                                                                                                                                                                                                                                                                                                                                                                                                                                                                                                                                                                                                                                                                                                                                                                                                                                                          |
| Complete List of Authors:       | Kralj-Hans, Ines; Ashford and Saint Peter's Hospitals NHS Trust, Li, Kuo; Imperial College London<br>Wesek, Adrian; Imperial College London<br>Lamorgese, Alexia; JB Medical Ltd<br>Omar, Fatima; Ashford and Saint Peter's Hospitals NHS Trust<br>Ranasinghe, Kapila; Ashford and Saint Peter's Hospitals NHS Trust<br>McGee, Megan; Ashford and Saint Peter's Hospitals NHS Trust<br>Brack, Kieran; Ashford and Saint Peter's Hospitals NHS Trust<br>Li, Shiliang; East China University of Science and Technology<br>Aggarwal, Ritesh; Max Hospital<br>Bulle, Ajay; Meditrina institute of medical science<br>Kodre, Aparna; Noble Hospital<br>Sharma, Shashank; Ashford and Saint Peter's Hospitals NHS Trust, St Peters Hospital Emergency Department<br>Fluck, David; Ashford and Saint Peter's Hospitals NHS Trust, Cardiology<br>John, Isaac; Ashford and Saint Peter's Hospitals NHS Trust<br>Sharma, Pankaj; Royal Holloway University of London<br>Belsey, Jonathan; JB Medical Ltd<br>Li, Ling; City University, Department of Engineering<br>Seshasai, Sreenivasa Rao Kondapally; St George's University Hospitals NHS Foundation Trust<br>Li, HongLin; Shanghai Key Laboratory of New Drug Design<br>Marczin, N; Imperial College London<br>Chen, Zhong; Ashford and Saint Peter's Hospitals NHS Trust |
| <b>Primary Subject Heading</b>: | Infectious diseases                                                                                                                                                                                                                                                                                                                                                                                                                                                                                                                                                                                                                                                                                                                                                                                                                                                                                                                                                                                                                                                                                                                                                                                                                                                                                                  |
| Secondary Subject Heading:      | Respiratory medicine                                                                                                                                                                                                                                                                                                                                                                                                                                                                                                                                                                                                                                                                                                                                                                                                                                                                                                                                                                                                                                                                                                                                                                                                                                                                                                 |
| Keywords:                       | COVID-19, INFECTIOUS DISEASES, Respiratory infections < THORACIC MEDICINE                                                                                                                                                                                                                                                                                                                                                                                                                                                                                                                                                                                                                                                                                                                                                                                                                                                                                                                                                                                                                                                                                                                                                                                                                                            |
|                                 |                                                                                                                                                                                                                                                                                                                                                                                                                                                                                                                                                                                                                                                                                                                                                                                                                                                                                                                                                                                                                                                                                                                                                                                                                                                                                                                      |

SCHOLARONE™  
Manuscripts





I, the Submitting Author has the right to grant and does grant on behalf of all authors of the Work (as defined in the below author licence), an exclusive licence and/or a non-exclusive licence for contributions from authors who are: i) UK Crown employees; ii) where BMJ has agreed a CC-BY licence shall apply, and/or iii) in accordance with the terms applicable for US Federal Government officers or employees acting as part of their official duties; on a worldwide, perpetual, irrevocable, royalty-free basis to BMJ Publishing Group Ltd ("BMJ") its licensees and where the relevant Journal is co-owned by BMJ to the co-owners of the Journal, to publish the Work in this journal and any other BMJ products and to exploit all rights, as set out in our [licence](#).

The Submitting Author accepts and understands that any supply made under these terms is made by BMJ to the Submitting Author unless you are acting as an employee on behalf of your employer or a postgraduate student of an affiliated institution which is paying any applicable article publishing charge ("APC") for Open Access articles. Where the Submitting Author wishes to make the Work available on an Open Access basis (and intends to pay the relevant APC), the terms of reuse of such Open Access shall be governed by a Creative Commons licence – details of these licences and which [Creative Commons](#) licence will apply to this Work are set out in our licence referred to above.

Other than as permitted in any relevant BMJ Author's Self Archiving Policies, I confirm this Work has not been accepted for publication elsewhere, is not being considered for publication elsewhere and does not duplicate material already published. I confirm all authors consent to publication of this Work and authorise the granting of this licence.

1  
2  
3 **Leflunomide Treatment for Patients Hospitalised with COVID-19: DEFEAT-COVID Randomised**  
4 **Controlled Trial**  
5

6  
7 Authors:

8 Ines Kralj-Hans<sup>1</sup>, Kuo Li<sup>2</sup>, Adrian Wesek<sup>2</sup>, Alexia Lamorgese<sup>4</sup>, Fatima Omar<sup>1</sup>, Kapila Ranasinghe<sup>1</sup>, Megan  
9 McGee<sup>1</sup>, Kieran Brack<sup>1</sup>, Shiliang Li<sup>5</sup>, Ritesh Aggarwal<sup>6</sup>, Ajay Bulle<sup>7</sup>, Aparna Kodre<sup>8</sup>, Shashank Sharma<sup>1</sup>, David  
10 Fluck<sup>1</sup>, Isaac John<sup>1</sup>, Pankaj Sharma<sup>9</sup>, Jonathan Belsey<sup>4</sup>, Ling Li<sup>3</sup>, Sreenivasa Rao Kondapally Seshasai<sup>10</sup>,  
11 \*HongLin Li<sup>5</sup>, \*Nandor Marczin<sup>2</sup>, \*Zhong Chen<sup>1</sup>, on behalf of DEFEAT-COVID Investigators  
12  
13  
14  
15

16  
17 \*Joint senior authors  
18

19 Affiliations:

- 20 1. Ashford and St Peter's Hospital NHS Foundation Trust, UK  
21 2. Faculty of Medicine, Imperial College London, UK  
22 3. City University London, UK  
23 4. JB Medical, UK  
24 5. Shanghai Key Laboratory of New Drug Design, School of Pharmacy, East China University of Science and  
25 Technology, China  
26 6. Max Hospital, New Delhi, India  
27 7. Meditrina institute of medical science, Nagpur, India  
28 8. Noble Hospital, Pune, India  
29 9. Institute of cardiovascular research, Royal Holloway, University of London, UK  
30 10. St George's University Hospitals NHS Foundation Trust, UK  
31  
32  
33  
34  
35  
36  
37

38 Corresponding author: Dr Ines Kralj-Hans, [i.kralj-hans@nhs.net](mailto:i.kralj-hans@nhs.net)

39 Ashford and St Peter's Hospital NHS Foundation Trust, Guildford Street, Chertsey, KT16 0PZ, UK  
40  
41  
42  
43  
44  
45  
46  
47  
48  
49  
50  
51  
52  
53  
54  
55  
56  
57  
58  
59  
60

**Abstract**

Objective: To evaluate the clinical efficacy and safety of leflunomide (L) added to the standard of care (SOC) treatment in COVID-19 patients hospitalised with moderate/critical clinical symptoms.

Design: Prospective, open-label, multicentre, stratified, randomised clinical trial.

Setting: Five hospitals in United Kingdom and India, from September 2020 to May 2021.

Participants: Adults with polymerase-chain-reaction (PCR) confirmed COVID-19 infection with moderate/critical symptoms within 15-days of onset.

Intervention: Leflunomide 100 mg/day (3-days) followed by 10-20 mg/day (7-days) added to standard care.

Primary outcomes: The time to clinical improvement (TTCI) defined as two-point reduction on a clinical status scale or live discharge prior to 28 days; safety profile measured by the incidence of adverse events (AE) within 28 days.

Results: Eligible patients (n=214; age 56.3±14.9 years; 33% female) were randomised to SOC+L (n=104) and SOC group (n=110), stratified according to their clinical risk profile. TTCI was 7 vs. 8 days in SOC+L vs. SOC group (HR 1.317; CI 0.980, 1.768; p=0.070). Incidence of serious adverse events was similar between the groups and none was attributed to leflunomide. In sensitivity analyses, excluding 10 patients not fulfilling the inclusion criteria and 3 who withdrew consent before leflunomide treatment, TTCI was 7 vs. 8 days (HR 1.416, CI 1.041, 1.935; p=0.028), indicating a trend in favour of the intervention group. All-cause mortality rate was similar between groups, 9/104 vs. 10/110. Duration of oxygen dependence was shorter in the SOC+L group being a median 6-days (IQR 4-8) compared to 7-days (IQR 5-10) in SOC group (p=0.047).

Conclusion: Leflunomide, added to the SOC treatment for COVID-19, was safe and well tolerated but had no major impact on clinical outcomes. It may shorten the time of oxygen dependence by one day and thereby improve TTCI /hospital discharge in moderately affected COVID-19 patients.

**Trial registration**

EUDRACT: CTA 21517/0004/001-0001 2020-004994-27

ClinicalTrials.gov: NCT05007678

### Strengths and limitations

- International, prospective, randomised controlled study
- Repurposing a marketed drug with established safety profile and promising dual antiviral and immunomodulating medication based on strong drug discovery data.
- Study participants had milder COVID-19 disease than originally intended, thus eroding the power of the study
- Evolving standard of care therapy possibly diminished measurable benefit of leflunomide

For peer review only

## Introduction

COVID-19 pandemic caused unprecedented strain on health care services around the world. It has affected almost 16 million people globally and caused over 6 million deaths so far.<sup>[1]</sup> Associated clinical syndromes include pneumonia, systemic inflammatory response and cardiovascular complications with high morbidity and mortality. Progressive deterioration is thought to be related to the kinetics of viral replication culminating in a surge of inflammatory mediator release, “cytokine storm”.<sup>[2]</sup> Around 5-10% of infected patients experience severe or life-threatening symptoms with high mortality.<sup>[3]</sup>

Direct-acting and host-targeting antiviral treatments are the two approaches in treating viral infections. Host targeting antiviral treatments may have an advantage over direct antivirals as they enable the body to fight against a broad spectrum of viruses by simultaneously blocking viral replication and overcoming the potential of viral mutagenesis.<sup>[4]</sup> Anti-inflammatory medications have been shown to improve survival through dampening of the inappropriate immune response in susceptible patients.<sup>[5]</sup> This has led to the search for a drug with such therapeutic properties.

Leflunomide is a drug licenced to treat rheumatoid arthritis (RA).<sup>[6]</sup> It is widely available, cost-effective and can be easily administered both in the hospital and domestic settings. In preclinical models of cell and animal infection by SARS-CoV-2, leflunomide was shown to be a potent inhibitor of human dihydroorotate dehydrogenase (DHODH), an enzyme vital to viral replication in the host cell.<sup>[7,8,9]</sup> It has the potential advantage of not only targeting the virus infection but also suppressing the ensuing inflammatory response which may play a role in more progressive stages of infection leading to serious complications.

The DEFEAT-COVID study (Targeting *de novo* pyrimidine biosynthesis by leflunomide for treatment of corona virus disease 2019) tested whether leflunomide added to standard care was clinically effective and safe for COVID-19 moderate/severe symptoms.

## Methods

*Study design* – This was a multicentre, international, open label, prospective, randomised controlled clinical trial set up at 5 hospitals (two in UK and three in India). The recruitment took place between September 2020 and May 2021, and was approved by all relevant ethics committees.

*Participants* - Patients aged 18 years and above presenting with moderate to critical symptoms of PCR-confirmed COVID-19 disease within 15 days of symptoms onset were recruited. Patients with respiratory compromise and blood oxygen saturation (SpO<sub>2</sub>) <93% on room air detected on pulse oximeter were considered to fulfil the moderate infection criteria. Patients with respiratory failure, septic shock and/or multiple organ dysfunction/failure needing assisted ventilation were considered to be critically ill. Pregnant or breast-feeding women, individuals already receiving specific monoclonal antibody therapy or those with severe immunodeficiency syndrome and hypoalbuminaemia and patients with hypersensitivity to leflunomide or liver

1  
2  
3 enzymes aspartate transaminase (AST) / alanine transaminase (ALT)  $\geq 2$  x upper limits of normal (ULN) were  
4 excluded from the study. All participants gave written informed consent to a member of their clinical care team.  
5  
6

7  
8 *Randomisation* – Consented participants were randomised by a member of the clinical care team to either the  
9 control arm (receiving standard of care treatment [SOC] alone) or the intervention arm (SOC treatment +  
10 leflunomide (SOC+L)) using a stratified block randomisation web-based algorithm. Patient admission data (age  
11  $\leq/\geq 70$ ; co-morbidities; clinical status based on National Early Warning Score 2, NEWS2)<sup>[10]</sup> were used to stratify  
12 patients into 4 risk categories. Group 1: high/moderate comorbidity risk with NEWS2 score  $\geq 5$ ; Group 2:  
13 high/moderate comorbidity risk with NEWS2 score  $< 5$ ; Group 3: low comorbidity risk with NEWS2 score  $\geq 5$ ;  
14 and Group 4: low comorbidity risk with NEWS2 score  $< 5$ .  
15  
16  
17  
18

19  
20 *Interventions* - The definition of the SOC treatment for COVID-19 evolved nationally and internationally through  
21 the course of our study, with progressive evolution in the understanding of disease pathology and emerging  
22 treatment evidence. The SOC during the time of the study across all sites involved four main treatment domains:  
23 steroids, anticoagulation, antibiotics, and antiviral medications. The intervention group (SOC+L) received oral  
24 leflunomide at a loading dose of 100mg/day for three days and then 20mg/day for 7 days as a maintenance dose.  
25 The maintenance dose was reduced to 10mg/day if liver enzymes AST/ALT exceeded 2 x ULN. Leflunomide  
26 treatment was stopped early if AST/ATL exceeded 3 x ULN during the intervention. Study participants received  
27 additional COVID-19 therapies, including monoclonal antibodies, at the discretion of the direct care clinical team,  
28 even if leflunomide was initiated.  
29  
30  
31  
32  
33

34 *Study procedures* - Patient related clinical/investigation data, treatment compliance, outcomes and adverse events  
35 (AE) were collected by the site investigators and recorded on the pre-specified daily electronic case report form  
36 (e-CRF, see Appendix). Adverse events (AE) were graded according to the Common Terminology Criteria for  
37 Adverse Events.<sup>[11]</sup> Blood samples were collected and processed for quantifying viral load (on days 1, 7, 11, 15,  
38 28 or day of discharge) and for future inflammatory profiling (on days 1, 3 and 11). Liver enzymes were measured  
39 at baseline, on day 3 after the leflunomide loading and on discharge. Patient questionnaire was administered at  
40 28- and 90-days after randomisation to monitor the persistence of symptoms possibly associated with long COVID  
41 syndrome.<sup>[12]</sup> SpO<sub>2</sub>/FiO<sub>2</sub> data were monitored daily. The frequency of SpO<sub>2</sub> monitoring varied with FiO<sub>2</sub>  
42 administration. It is standard clinical practice that SpO<sub>2</sub> is monitored every 4 hours in a clinically stable patient.  
43 The frequency increases to continuous SpO<sub>2</sub> monitoring in a patient with oxygen requirement or ventilation  
44 support. Where multiple daily values were recorded we selected the SpO<sub>2</sub>/FiO<sub>2</sub> ratio reflecting increased oxygen  
45 demand.  
46  
47  
48  
49  
50  
51

52 *Blinding* - Site investigator teams and direct clinical care teams were not blinded to the randomisation outcomes,  
53 but neither were provided information about the aggregate patient outcomes.  
54  
55  
56  
57  
58  
59  
60

1  
2  
3 *Outcomes* - The primary outcome is the time (days) from randomisation to clinical improvement (TTCI) of two  
4 points on a seven-category clinical status scale or live discharge from hospital prior to 28 days.<sup>[13]</sup> The clinical  
5 status ordinal scale consisted of the following: 1 not hospitalised, resumption of normal activities; 2 not  
6 hospitalised, but unable to resume normal activities; 3 hospitalised, not requiring supplemental oxygen; 4  
7 hospitalised, requiring supplemental oxygen; 5 hospitalised, requiring nasal high-flow oxygen (HFNC) therapy,  
8 non-invasive mechanical ventilation (NIV), or both; 6 hospitalised, requiring extracorporeal membrane  
9 oxygenation (ECMO), invasive mechanical ventilation (IMV), or both; and 7 death.

10  
11  
12  
13  
14  
15 Safety profile of leflunomide in this group of patients was assessed from incidence rates of AE deemed to be  
16 serious and/or severe ( $\geq$ Grade 3). Grading guidelines suggest 5 categories: 1 mild, asymptomatic or mild  
17 symptoms, clinical or diagnostic observations only, intervention not indicated; 2 moderate, minimal, local or non-  
18 invasive intervention indicated, limiting age-appropriate instrumental activities of daily livings (ADL); 3 severe,  
19 medically significant but not immediately life-threatening, hospitalization or prolongation of hospitalization  
20 indicated, disabling; limiting self-care ADL; 4 life-threatening consequences, urgent intervention indicate; 5 death  
21 related to AE. In addition, the incidences, and levels of liver transaminitis (ALT, AST) were assessed.

22  
23  
24  
25  
26 The main secondary outcomes were focused on overall (all-cause) mortality, and oxygen dependence (duration in  
27 days) assessed by S/F ratio (i.e. oxygen saturation detected by pulse oximeter [SPO<sub>2</sub>] / supplemental oxygen  
28 concentration [FiO<sub>2</sub>]) and impact on viral replication (viral load). Additional secondary outcomes included  
29 inflammatory targets such as CRP, lymphocyte counts, and selected cytokines (initially focussing on IL2, IL6,  
30 TNF- $\alpha$ ). The concept of long COVID emerged during the study, so we used the data from our questionnaires at  
31 28 and 90 days to comment on long COVID symptoms

### 32 **Statistical analyses**

33  
34  
35  
36  
37 *Sample size calculation* - The primary outcome measure was a time-to-event analysis based on an assessment of  
38 TTCI. Since our study protocol was conceived and developed during the initial peak of the global pandemic, the  
39 precise hazard ratio for major clinical outcomes related to this infection was largely unknown and, therefore,  
40 sample size calculation was based on the proportion of patients expected to meet the outcome criteria by 28 days.<sup>[14]</sup>  
41 Assuming  $\alpha = 0.05$ ,  $\beta = 0.20$  and allocation ratio = 1:1, the number of patients per treatment arm was estimated  
42 to be 74. We expected a 20% attrition rate, so the total number of patients required in the study was calculated to  
43 be 178, 89 patients in each arm.

44  
45  
46  
47  
48 *Analysis population* - The full analysis set was defined according to the intention to treat principle (ITT). All  
49 subjects randomised were included in the ITT analysis set for the primary outcome, regardless of whether they  
50 received any dose of their allocated treatment. This analysis set was used to summarize baseline patient  
51 characteristics and to carry out all efficacy and safety assessments. Subjects were analysed according to their  
52 randomised treatment allocation. We also present a modified intention to treat analysis for the primary and  
53 secondary outcomes, as a sensitivity analysis, to account for study participants who were randomised in error and  
54 those who withdrew consent prior to the intervention.

55  
56  
57  
58 *Primary outcomes* - The TTCI data was estimated using Kaplan-Meier survival curves. Hazard ratio and 95%  
59 confidence intervals were estimated using Cox proportional hazards regression models. The primary analysis was  
60

1  
2  
3 stratified by the randomisation strata: baseline risk indicators (age  $\leq$ / $\geq$  70 years, co-morbidities) and NEWS2 score.  
4 Log rank test was used for comparing the Kaplan-Meier curves, hazard ratios and their confidence intervals for the  
5 significance of the treatment effect.  
6

7  
8 *Secondary outcomes* - Continuous secondary outcomes were evaluated for within-groups differences using the  
9 Mann-Whitney U or Wilcoxon rank tests, respectively, depending on the data distribution identified: parametric  
10 or non-parametric. Statistical normality was assessed using the Shapiro-Wilk method. Categorical outcomes were  
11 assessed for between-group differences using the chi-square method and expressed as %. For all outcomes,  
12 statistical significance was accepted at a 2-sided  $\alpha$  of 0.05.  
13

14  
15 *Adverse events* - AEs were coded using MedDRA and assigned grades based on National Cancer Institute  
16 Common Terminology Criteria for Adverse Events Version 4.03.<sup>[11]</sup>  
17

### 18 19 20 **Public and patient involvement**

21 Patient volunteers were consulted regarding the study design and materials to be provided to the potential  
22 participants (patient information sheet, consent forms, questionnaires). Two lay members were appointed to the  
23 Trial Steering Committee and provided input on the conduct of the study.  
24  
25  
26  
27  
28  
29  
30  
31  
32  
33  
34  
35  
36  
37  
38  
39  
40  
41  
42  
43  
44  
45  
46  
47  
48  
49  
50  
51  
52  
53  
54  
55  
56  
57  
58  
59  
60



## Results

### Recruitment, Randomisation, Assignment of Therapy and Follow-up

Between September 2020 and May 2021, 214 patients were recruited to the study from 2 UK Hospitals (n=66, 31%; Ashford and St Peters' NHS Trust, Surrey; Kingston Hospital NHS Trust, London) and 3 Hospitals in India; (n=148, 69%; Max Hospital, Delhi; Meditrina Institute, Nagpur; Noble Hospital, Pune). Due to the wavering new COVID-19 infections, the UK recruitment came to a halt in February 2021 and patients at the three Indian sites were recruited in the remaining period. Of the 214 participating patients, 104 were randomised to the intervention (SOC+L) group and 110 to the control (SOC) group. In the SOC+L group, 3 patients withdrew study consent after randomisation, and did not receive leflunomide therapy. During the data cleaning process, 10 patients were flagged as not meeting the inclusion criteria (6 in SOC+L; 4 in SOC), as they did not have moderate COVID-19 symptoms at the time of randomisation. Daily clinical data were collected for all patients during hospitalisation and the patients were asked to complete follow-up questionnaires at 28- and 90-days after randomisation, as shown in Figure 1 (CONSORT diagram).

Baseline patient characteristics were similar between the SOC+L and SOC groups, summarised in Table 1.

| Characteristics                                         | SOC+L<br>n=104  | SOC<br>n=110    |
|---------------------------------------------------------|-----------------|-----------------|
| Age, yrs, mean $\pm$ sd                                 | 55.2 $\pm$ 14.7 | 56.4 $\pm$ 15.2 |
| BMI, kg/m <sup>2</sup> , mean $\pm$ sd                  | 27.3 $\pm$ 5.1  | 27.7 $\pm$ 5.6  |
| Female gender at birth, %                               | 28.8            | 37.3            |
| <b>Ethnicity, %</b>                                     |                 |                 |
| South Asian                                             | 75              | 69              |
| White                                                   | 24              | 30              |
| Arab                                                    | -               | 0.91            |
| <b>Comorbidities, %</b>                                 |                 |                 |
| BMI $\geq$ 40 kg/m <sup>2</sup>                         | 2.9             | 4.6             |
| Age $\geq$ 70 yrs                                       | 18.3            | 20              |
| Chronic respiratory disease                             | 8.7             | 15.5            |
| Chronic cardiovascular disease (including hypertension) | 38.5            | 39.1            |
| Chronic renal disease                                   | 2.9             | 2.7             |
| Diabetes                                                | 23.1            | 20.9            |
| Immunosuppressive diseases                              | 6.7             | 6.4             |
| <i>Others</i>                                           |                 |                 |
| Malignant neoplasm                                      | 3.9             | 2.7             |
| Chronic haematological disease                          | 1               | 0.9             |
| Chronic neurological disorder                           | 10.6            | 3.7             |
| Malnutrition                                            | 1               | 0.9             |
| Smoking (present or past)                               | 21.1            | 20              |
| <b>Symptom duration, day, median (IQR)</b>              | 6 (4-8)         | 6 (5-8)         |
| <b>Time from admission, day, median (IQR)</b>           | 2 (1-4)         | 2 (1-3)         |
| <b>Non-invasive ventilation, %</b>                      | 4.8             | 7.3             |
| <b>Invasive ventilation, %</b>                          | 1               | 1.8             |
| <b>NEWS 2 score median (IQR)</b>                        | 6 (4-8)         | 5 (4-8)         |
| <b>CRP, mg/L, median (IQR)</b>                          | 28 (9-77)       | 32 (13-64)      |
| <b>Transaminase, &gt;ULN, %</b>                         |                 |                 |
| ALT                                                     | 44.7            | 31.7            |
| AST                                                     | 35.4            | 28.4            |
| <b>Stratification, %</b>                                |                 |                 |
| Group 1                                                 | 12.5            | 14.5            |
| Group 2                                                 | 14.4            | 16.4            |
| Group 3                                                 | 48.1            | 46.4            |
| Group 4                                                 | 25              | 22.7            |

**Table 1: Baseline patient characteristics at the time of randomization**

BMI: Body mass index; ULN = upper limits of normal; Group 1: High/Moderate comorbidity risk with NEWS2 score  $\geq$ 5; Group 2: High/Moderate comorbidity risk with NEWS2 score <5; Group 3: Low comorbidity risk with NEWS2 score  $\geq$ 5; and Group 4: Low comorbidity risk with NEWS2 score <5. Creatinine ULN: 104 $\mu$ mol/L; ALT ULN: 49 U/L; AST ULN: 48 U/L; Immunosuppressive disease: asplenia, rheumatological disorder.

1  
2  
3 Baseline characteristics were similar in both arms but there were significantly more patients with chronic  
4 neurological disorders in the SOC+L group. None of the patients with this condition had contraindication to  
5 non-invasive ventilation.  
6  
7

## 8 Treatment Assignment and Compliance

9 Full course of leflunomide therapy was completed by 81/104 patients (78%). Of the 19 patients (16 in UK, 3 in  
10 India) who did not complete treatment, 3 patients did not receive a single dose of leflunomide as they withdrew  
11 consent soon after randomization, 5 patients died prior to completion of the full course, 8 patients stopped  
12 leflunomide early when ALT/AST exceeded 3 x ULN laboratory reference range, 1 patient had tocilizumab  
13 introduced to replace leflunomide, 1 patient self-discharged early and 1 refused final two doses. Leflunomide  
14 treatment compliance appeared to be better in participants from Indian centres as 92% of them received the full  
15 dose of leflunomide compared to 52% of patients in the UK centres which was largely due to a higher incidence  
16 of liver enzyme transaminitis and mortality observed in the UK cohort.  
17

18 There was no significant difference in the assignment of standard of care treatment between the SOC+L and  
19 SOC groups as shown in Figure 1. It included corticosteroids, anticoagulants, antibiotics, and antiviral therapies.  
20 Overall, steroid uptake was >95% in both treatment arms with different protocols used at participating study  
21 centres: dexamethasone 4 mg/day for 3 days; dexamethasone 6 mg/day for 7-10 days; methylprednisolone 80  
22 mg/day for 7 days and methylprednisolone 120 mg/day for 5 days. However, there was no difference in the  
23 steroid treatment assigned between the control and the treatment groups. There were some differences in the  
24 proportions of patients receiving additional adjunct therapies such as hydroxychloroquine and immunotherapy  
25 (Supplementary table 1). Overall, hydroxychloroquine was prescribed to similar proportion of patients in the  
26 intervention and the control group (47%) but the proportions of patients receiving it in the UK was much  
27 smaller, 3% compared to 67% in India. A small number of patients received immunomodulating drugs such as  
28 interferon alpha and beta (n = 20 in India), tocilizumab and bevacizumab (n = 5 in the UK, n = 2 in India).  
29  
30  
31  
32  
33  
34  
35  
36  
37  
38

## 39 Primary Outcomes

40 *Time to clinical improvement of 2 points on a clinical status scale/discharge before 28 days*

41 In the ITT analyses (n = 214), SOC+L group did not have a significantly shorter TICI than the SOC group  
42 within 28 days of randomisation; the median was 7.0 (IQR 7.0 - 8.0) days vs. 8.0 (IQR 7.0 - 9.0) days,  
43 respectively; with a hazard ratio (HR) of 1.32 (CI 0.98 -1.77), p = 0.070 (Figure 2).  
44

45 In modified ITT population (n = 201) where 3 patients who withdrew consent after being randomised to the  
46 SOC+L group but never received leflunomide treatment and 10 patients who did not fulfil moderate COVID-19  
47 symptoms at randomisation were excluded from analysis, the median TICI was significantly shorter in the  
48 SOC+L group than SOC group by 1.0 day, median 7.0 days (IQR 7.0 -8.0) vs. 8.0 (IQR 7.0 – 9.0), respectively,  
49 with a HR of 1.42 ( CI 1.04 – 1.94); p = 0.028.  
50  
51  
52  
53

## 54 Safety

55 Incidences of AE of all grades are summarized in Table 2.  
56  
57  
58  
59  
60

| Adverse events                                      | SOC+L<br>(n= 104) | SOC<br>(n=110) |
|-----------------------------------------------------|-------------------|----------------|
| <b>Adverse events (n) / Patients (n)</b>            | 121 / 56          | 91/ 42         |
| Grade 1 (Mild)                                      | 58 / 39           | 48 / 32        |
| Grade 2 (Moderate)                                  | 23 / 13           | 17/9           |
| Grade 3 (Severe)/ Grade 4 (Life threatening events) | 31/15             | 16/9           |
| Grade 5 (Deaths)                                    | 9/9               | 10/10          |

**Table 2: Incidence of reported adverse events in both treatment arms.**

The table shows the number of adverse events recorded in the study and the number of patients affected by at least one adverse event.

At least one AE was reported in 98/214 participants, and most of them were mild in severity. AEs of moderate grade were reported in 13/104 patients in SOC+L group and 9/110 patients in SOC group. Serious AEs (n=47) were reported in 15/104 patients in SOC+L groups and 9/110 in SOC group and 19 patients died (9 in SOC+L group, 10 in the SOC group). There was no significant difference in the incidence of AE reported between the two groups. No Serious AEs were attributed to leflunomide. A supplementary Table 2 lists all adverse events recorded in the study according to MedDRA terms.

### *Liver function*

At baseline, more patients with greater than ULN levels of ALT and AST were randomized in the SOC+L group than the SOC group (ALT: 46 vs 33,  $p = 0.049$ ; AST: 31 vs 24,  $p = 0.340$ ). By Day 3/4, following the initial loading of leflunomide therapy in the SOC+L group, there was a significantly higher number of patients with greater than ULN level of ALT and AST in the SOC+L than the SOC group (64 vs 38,  $p < 0.001$ ; and 51 vs 24,  $p < 0.001$ ). By discharge, the difference in the number of patients with ALT and AST transaminitis between the SOC+L and SOC groups was no longer significant (28 vs 27,  $p = 0.633$ ; and 20 vs 17,  $p = 0.318$ ) (Supplementary table 3). Leflunomide therapy was terminated early if transaminase levels exceeded 3 x ULN. However, there were 5 patients in India who continued with leflunomide therapy at the discretion of the researcher and direct care team with close monitoring of their liver function. Interestingly, in this subset of patients, the transaminase levels improved despite continuation of therapy. There were no adverse events related to clinically significant liver injury due to leflunomide. AEs related to liver dysfunction were reported in 16/104 (15.4%) patients in SOC+L group, 7 were mild, 8 were moderate and 1 was severe. Of these, 10 were deemed possibly treatment related and leflunomide treatment was discontinued in 9 patients. Comparatively, in the control group, 6/110 (5.5%) patients had liver dysfunction related AE. Five of them were mild and 1 case was severe.

### **Secondary Outcomes**

A modified intent to treat approach was used for data from 201 patients for all secondary outcomes. This included 95 patients in the SOC+L group and 106 patients in SOC group. For these analyses we excluded 3 patients in the SOC+L group who withdrew consent and never received leflunomide and 10 patients (6 SOC+L; 4 SOC) who

1  
2  
3 did not fulfil moderate COVID symptoms inclusion criterion (did not show respiratory compromise and blood  
4 oxygen saturation (SpO<sub>2</sub>) <93% on room air).  
5  
6  
7

### 8 *Mortality*

9  
10 There was no difference in all-cause mortality within 28 days of randomization between the treatment arms as  
11 9/95 (9.47%) of patients died in SOC+L group compared to 10/106 (9.43%) in SOC groups. The survival curves  
12 diverge in favour of the SOC+L group after 10 days of hospital treatment, but the curves converged again after 3  
13 weeks (when majority of the patients have been discharged). All deaths were attributed to complications related  
14 to Covid-19 (Figure 3, panel A)  
15  
16  
17

### 18 *Oxygenation and assisted ventilation*

19  
20 Oxygen independence is defined by maintenance of SpO<sub>2</sub>/FiO<sub>2</sub> Air ratio > 4.43. There was a difference in the  
21 median time the participants required to be completely weaned off oxygen therapy between groups; 6.0 (IQR  
22 4.0 – 8.0) days in the SOC + L group vs. 7.0 (5.0 – 10.0) days in the SOC group, p = 0.047 (Figure 3, panel B)  
23  
24  
25

26  
27 Non-invasive ventilation was required for 14.4% of patients in SOC+L group vs. 16.4% in the SOC group. The  
28 duration of non-invasive ventilation was 6.0 (IQR 2.0-9.0) days in the SOC+L group compared to 4.5 days (IQR  
29 2.3-6.8) in the SOC group. Similar proportion of patients required non-invasive ventilation at the time of study  
30 enrolment (4.8% in SOC+L group vs. 7.3% in SOC group, p= 0.45).  
31

32  
33 The proportion of patients admitted to level-2 Intensive Care Unit (ICU) was 8.7 % in the SOC+L group and  
34 8.2% in the SOC group. The median time spent at ICU was 8.0 (IQR 5.0-10.0) days vs. 9.0 (IQR 5.0-13.0) days,  
35 respectively. Invasive ventilation was required for 3.9% of patients in the SOC+L group and 5.5% in the SOC  
36 group with median duration of 6 (IQR 4.8, 6.0) days vs. 7.0 (IQR 5.3 - 11.8) days, respectively. None of the  
37 between group comparisons were statistically significant. Patients recruited in India were significantly less  
38 likely to require invasive or non-invasive ventilation or be admitted to ICU compared to patients recruited in the  
39 UK (p<0.001).  
40  
41  
42  
43

### 44 *Viral load*

45  
46 Quantitative SARS-COV-2 PCR measurements from nasopharyngeal swabs at baseline showed no difference in  
47 median log<sup>10</sup> viral loads (copies/ml) between the two groups, SOC+L 4.68 (IQR 4.45-4.85) vs SOC 4.76 (IQR  
48 4.48-4.92), p =0.27.. We clustered the serial samples to reflect the crucial time intervals during the hospital stay:  
49 time coinciding with finishing leflunomide loading dose (by Day 4), time to 75% patients being discharged from  
50 hospital (by Day 7), time to finishing leflunomide maintenance dose (by Day 11) and beyond (Figure 4). Viral  
51 loads were significantly reduced in both treatment arms. There was no significant difference in the overall rate  
52 of the viral load clearance between the two groups by Day 11 and beyond. Viral loads were significantly  
53 reduced in both treatment arms by Day 7, p<0.001; and by Day 11, p <0.030. The rate of viral load reduction  
54 between groups by Day 11 appeared to be similar.  
55  
56  
57  
58  
59  
60

### *Cytokines, CRP and lymphocytes*

Cytokine levels were assessed separately for UK and Indian sites as two laboratories using different assays processed the samples. The median baseline levels of IL 2, IL 6 and TNF- $\alpha$  levels (UK: IL2 0.43 [IQR 0.30-0.62] pg/ml; IL6 6.2 [IQR 2.9-9.7] pg/ml; TNF- $\alpha$  10.1 [IQR 7.8 -13.5] pg/ml; India: IL2 4.3 [IQR 2.8-5.8] pg/ml; IL6 12.6 [IQR 6.5-43.1] pg/ml; TNF- $\alpha$  6.1 [IQR 4.9-7.1] pg/ml) were not significantly raised from normal reference ranges and were not different between treatment groups in both countries. The cytokine levels were reduced during hospitalisation, though the clinical significance of these changes within the normal range is uncertain. There was no significant difference in the trends observed between treatment arms.

The median baseline levels of CRP were similar in both groups, 28, (IQR 8-71) in SOC+L vs. 34 (14-71) mg/L in SOC. By one week of treatment, there was similar levels of reduction between groups.

The median baseline lymphocytes levels were lower than normal reference range in both groups (0.99 [IQR 0.6-1.6]  $\times 10^9/L$  in SOC+L vs 0.95 (IQR 0.6-1.6)  $\times 10^9/L$  in SOC. By 1 week of treatment, levels rose to normal range in both groups. There was no significant difference in the trends observed between groups.

### *28- and 90-days follow up*

At 28 days, 59/81 patients (71.2%) in the SOC+L group and 60/91 patients (65.9%) in the SOC group experienced at least 1 of 9 common long-COVID symptoms (fatigue, cough, anxiety, chest pain, brain fog, breathlessness, disturbed sleep, palpitations, joint pain); with sleep quality (48.2% vs. 38.5%), breathlessness (40.7 vs 42.9%), joint pain (32.1 vs. 33%), fatigue (29.6 vs, 31.9%), and anxiety (24.7 vs. 19.8%) being the commonest symptoms experienced (Supplementary table 4). At 90 days, there was a reduction in overall prevalence of symptoms as 42/81 patients (51.2%) in the SOC+L group and 37/91 (40.7%) patients in the SOC group and any of the residual symptoms were of reduced severity. There was no significant difference in these outcomes between the treatment arms.

Myalgia symptoms were comparably reduced between the 2 groups at 90 days. Anosmia and loss of taste were still reported by 2 and 7 patients, respectively, in the SOC+L group, but none in the SOC group.

At 28 days, 41.5% patients in the SOC + L group and 52.8% in SOC group, reported being moderately to severely dyspnoeic (Grade 4: stops for breath after walking 100m; Grade 5: too breathless to leave the house or breathless when dressing). These proportions were further reduced at 90 days, to 22% in the SOC+L group compared to 19.8% in SOC group. These differences were not significant in between group comparisons.

Mental health issues were highlighted by reports of feeling depressed and losing interest in doing things. Comparable proportions of patients in the SOC+L group and SOC group reported those problems at 28 days (17.9% vs 16.0%; 11.6% vs 14.2%, respectively) which were further reduced in both groups at 90 days (11.6% vs 9.4%; 9.5% vs 6.6%, respectively).

1  
2  
3 At 28 days participants in the SOC+L group scored their current health as being  $80\pm 25\%$  of the usual which  
4 increased to  $89\pm 17\%$  at 90 days. In the SOC group the scores were similar,  $82\pm 23\%$  and  $90\pm 17\%$  at 28 and  
5 90 days respectively.  
6  
7  
8  
9

## 11 Discussion

12  
13  
14 This study is the first prospective, multicentre, randomised, controlled clinical trial investigating the clinical  
15 efficacy and safety of leflunomide in treating acute COVID-19 infection. The study showed that a course of  
16 leflunomide (3 days of 100 mg/day loading dose followed by 7 days of 20 mg/day maintenance dose) added to  
17 the standard care treatment (steroids, anticoagulants, antibiotics and antiviral therapy), did not influence the  
18 primary outcome of the trial and the acute clinical outcomes at 28 days, or the prevalence of long-COVID  
19 symptoms at 28 and 90 days. However, participants who received leflunomide as an adjunct therapy were  
20 weaned off oxygen earlier, which translated to reduced hospital stay by one day. The medication appeared to be  
21 safe and well tolerated with no severe adverse events attributable to it. A small proportion of patients in our  
22 study were still burdened by COVID-19 related symptoms 90 days after randomisation.  
23  
24  
25  
26  
27

28  
29 This multicentre trial advances the evidence base on the impact of leflunomide, a repurposed rheumatoid  
30 arthritis medication, on COVID-19 infection. Leflunomide was a potentially attractive therapeutic choice from  
31 early preclinical and clinical experience reported from hospitals in Wuhan, China. Dihydroorotate  
32 dihydrogenase (DHODH), located in the inner mitochondrial membrane is a rate-limiting enzyme in de novo  
33 pyrimidine biosynthesis. In virus-infected cells, a large intracellular nucleotide pool is consumed by rapid viral  
34 replication. RNA viruses need unique UMP but not TMP in their genomes. As UMP is the particular nucleoside  
35 produced by DHODH, RNA viruses are sensitive to reduced DHODH activity. Preclinical models of cell and  
36 animal infection by SARS-CoV-2 demonstrated that leflunomide attenuates viral genome replication, suppresses  
37 inflammatory response and the release of pro-inflammatory cytokines and chemokines.<sup>[7,8,9]</sup> Early reports from  
38 China advocated major clinical benefits in patients treated with leflunomide both in terms of less severe  
39 outcomes and duration of infection.<sup>[15,16,17]</sup> While the current study did not reproduce these overall benefits in  
40 the ITT analysis regarding the primary outcome, it confirmed some positive effects in those patients who  
41 received the trial intervention (in modified intent to treat analysis).  
42  
43  
44  
45  
46  
47

48  
49 Our results are likely explained by the changing landscape and evolution of the routine COVID-19 treatment  
50 protocols in the standard arm of the study and the resultant severity of the COVID-19 outcomes in general. The  
51 initial phase of the COVID-19 pandemic was characterised by severe respiratory and systemic infections and poor  
52 outcomes due to the development of acute respiratory distress syndrome, multi-organ failure and eventual  
53 death.<sup>[18,19]</sup> Contrary to this early experience with COVID-19 management, the in-hospital mortality in the present  
54 study was much lower, less than 10% in both groups. The majority of patients in both treatment arms improved  
55 during hospitalisation and were discharged within a week of admission. Inclusion of prognostically significant  
56 COVID-19 therapies in both pharmacological and non-pharmacological standard of care treatments undoubtedly  
57 contributed to a reduction in severe complications and better overall outcomes. During patient recruitment of the  
58  
59  
60



1  
2  
3 current trial, various therapies have been introduced including more than 95% percent of the study population  
4 received steroids as standard of care.  
5

6  
7 Theoretical considerations suggest that leflunomide may effectively inhibit viral replication. The initial pilot  
8 study during the early outbreak of COVID-19 in Wuhan, China reported reduced viral shedding time following  
9 leflunomide treatment during acute infection compared to the standard of care therapy.<sup>[15]</sup> Similarly, viral shedding  
10 duration was reduced in leflunomide treated patients who remained qPCR positive 1 month after the initial  
11 infection.<sup>[16]</sup> Our study addressed the viral load reduction at pre-specified time points. Values of viral load were  
12 reduced over time but there was no difference between the treatment arms. Both methodological considerations  
13 and the inclusion of comprehensive pharmacological treatment regimens in the SOC could explain these  
14 differences. For instance, corticosteroid therapy was absent in the early study from Wuhan, but the later study  
15 refers to the use of hydroxychloroquine, interferon-alpha and antiviral medications as part of acute standard of  
16 care therapy.<sup>[15,16]</sup> However, our results are in line with other reports from China which showed that duration of  
17 viral shedding was not affected by leflunomide added to nebulised interferon alpha therapy for treating long-term  
18 positive COVID-19 after 4 weeks of in-hospital treatment.<sup>[17]</sup> Interestingly a third of these patients received  
19 corticosteroid therapy during the initial acute treatment.<sup>[16,17]</sup>  
20  
21  
22  
23  
24  
25

26  
27 Beyond the issue of therapeutic efficacy and viral load, our study confirms overall safety of leflunomide in  
28 COVID-19 infection. The safety profile of leflunomide is well established in the treatment of RA.<sup>[6]</sup> Leflunomide,  
29 repurposed for the COVID-19 treatment, was well tolerated since no serious adverse events were attributed to it.  
30 Similar findings were reported in other studies.<sup>[15,16,20]</sup> Mild transaminitis following long-term leflunomide use in  
31 the RA population is recognised, and usually resolves after medication is terminated. The mechanism is likely to  
32 be modulation of interleukins which may hinder the protection of hepatocytes from injury rather than direct  
33 toxicity.<sup>[21]</sup> There were comparable incidences of transaminitis in both treatment arms in our study. However,  
34 more patients in the UK cohort had raised liver function tests leading to modification or termination of leflunomide  
35 treatment. This may be accounted for by the difference in the severity of COVID-19 disease and spectrum of co-  
36 morbidities between UK and Indian participants rather than genetic polymorphism in drug metabolism. Overall,  
37 the proposed leflunomide regimen was well tolerated.  
38  
39  
40  
41  
42  
43  
44

45 One of the motivations of the current trial employing leflunomide was to benefit from the anti-inflammatory  
46 effects of this drug. In this context, hydrocortisone has been demonstrated as an effective therapy in severe  
47 COVID-19 infections and recent trials also demonstrated the benefit of tocilizumab, a selective IL-6 inhibitor and  
48 a different disease modifying rheumatoid arthritis medication. However, such finding is not universal as the  
49 benefit of tocilizumab is mainly demonstrated in critically to moderately ill patients.<sup>[22,23]</sup> A recent meta-analysis  
50 showed that the benefit of IL-6 receptor antagonist was encountered only in patients who were also treated with  
51 glucocorticoids.<sup>[24]</sup> This is in keeping with observations that a broader spectrum of pro-inflammatory cytokines,  
52 macrophages and T cell response have all been documented in severely ill patients demonstrating the role of a  
53 more complex inflammatory response. It is exactly this broader inflammatory reaction that could be targeted by  
54 leflunomide as its effect on cytokines is not restricted to IL 6 and it may also have an impact on activated T cell  
55 response.<sup>[8,9,25]</sup> Such phenomena might contribute to the benefits of reduced oxygen dependence in patients who  
56  
57  
58  
59  
60



1  
2  
3 have received leflunomide treatment. However, it is conceivable that the full benefit of such anti-inflammatory  
4 effect may be more pronounced in severely ill patients, but this population was underrepresented in our trial and  
5 the (inadvertent) inclusion of patients with milder symptoms may have led to some attrition of statistical power  
6 in our study. A more detailed analysis of the cytokine and metabolic profiles of our trial population is underway  
7 to clarify these important issues.  
8

9  
10 Another important consideration when discussing the potential benefits of leflunomide is the mutation ability of  
11 the SARS-CoV-2 virus.<sup>[26]</sup> So far, the mutations observed in different strains worldwide have largely been  
12 confined to the part of the spike protein affecting the virus's ability of cell entry as opposed to a region targeted  
13 by neutralising antibodies. However, the possibility of mutations in different regions cannot be excluded.  
14 Targeting the host's pyrimidine biosynthesis pathway by leflunomide, rather than using drugs with direct antiviral  
15 action, remains an advantage offering protection against a broader spectrum of viruses and potentially overcoming  
16 resistance. Indeed, DHODH inhibitors such as leflunomide has shown broad-spectrum antiviral effects against  
17 various RNA viruses in cell models.<sup>[7]</sup> Leflunomide may therefore be considered a viable pharmacological  
18 treatment for COVID-19 patients given it is well tolerated, safe, economical, and widely available. Its clinical  
19 effectiveness measured against recognised selective IL-6 inhibitors in the more severely/critically ill patients  
20 needs to be further explored as leflunomide may be the preferred option in countries where other  
21 immunomodulating agents, such as Talizumab, may not be practical or widely available.  
22  
23  
24  
25  
26  
27  
28  
29

### 30 **Limitations**

31  
32  
33 The present study has several limitations. In order to balance the needs of the trial with clinical care and to  
34 minimise disruption to already overstretched clinical resources during COVID-19 pandemic, we chose to adopt  
35 an open label study design. This design may have affected the data collection and clinical management of the  
36 patients and potentially introduced a bias. However, it also allowed early detection of significant adverse events  
37 and a potential outcome benefit. This was an important consideration when testing an off-label use of a medication  
38 in COVID-19, a disease with high morbidity and mortality.  
39

40  
41 The study was set out to recruit more severely and critically affected patients in a single country. However, due  
42 to recruitment restrictions because of national prioritization of critically ill patients to only a few studies  
43 together with scarcity of NHS resources during the pandemic, the study was extended abroad, ultimately  
44 recruiting less affected patients with heterogeneous clinical profiles. Although patient characteristics and  
45 medications received as part of SOC did not differ between the randomised arms, the more heterogeneous  
46 population, milder COVID-19 disease, and more effective standard of care treatments most likely impacted on  
47 the hypothesised effect size and the ability of finding a difference in our recruited sample. Finally, the COVID-  
48 19 restrictions affected our protocolised laboratory investigations, such as the serial viral load and  
49 comprehensive inflammatory profiling. Nevertheless, studies focusing on the more severely affected participants  
50 are underway and will be the subject of a separate submission.  
51  
52  
53  
54  
55  
56

### 57 **Conclusion**

58  
59 Leflunomide had no major impact on the clinical outcomes when administered together with the currently  
60 established but evolving therapies in moderately affected COVID-19 patients. It may shorten duration of oxygen

1  
2  
3 dependence thereby affecting the TICI and hospital discharge. Transaminitis associated with leflunomide therapy  
4 did not lead to excess adverse events compared to the control group and may have arisen in part due to the severity  
5 of clinical infection. Further studies are needed to investigate the potential benefits of leflunomide in the critically  
6 ill patients and the biological mechanisms involved.  
7  
8  
9

### 10 **Ethics statements**

11  
12 All patients taking part in the study signed written informed consent form once the study was ethically approved  
13 by relevant bodies in England (South Central - Berkshire Research Ethics Committee, Bristol REC Centre,  
14 reference number 20/SC/0264) and India (Max HealthCare Ethics Committee, reference number  
15 RS/MSSSH/GMHRCCMS/MHEC/CCM/20-23; Meditrina Institute Ethics Committee, reference number  
16 ECR/605/Inst/MH/2014/RR; Noble Hospital Institutional Ethics Committee, reference number  
17 NHIEC/FEB/2021/238).  
18  
19  
20  
21

### 22 **Data availability statement**

23  
24 The anonymized data may be available upon request following approval from the Trial Management Group and the  
25 Sponsor.  
26

### 27 **Acknowledgments**

28 We are grateful to all the patients who took part in the study and contributed their data to our research. We also  
29 thank their clinical care teams who helped with data collection. We are grateful for the support from medical  
30 research charity LifeArc as part of its initiatives to address the need for new therapies against COVID-19 against  
31 the backdrop of world pandemic.  
32  
33

34 We would like to acknowledge the vital roles of the following:

35 **Data Monitoring Committee:** David Morgan (Chair), Lajos Szentgyorgyi, Yee Cheah

36  
37 **Trial Steering Committee:** Brendan Madden (Chair), Patrick Yong, Sreenivasa Rao Kondapally Seshasai, Matt  
38 Mendes, Janice Rodrigues-Mendes, Rod Hughes, Sharanpal Jeetle, Subash Somalanka

39  
40 **Clinical Research Organisation:** Innovate Research CRO in India helped with site and patient recruitment,  
41 project management, monitoring & data collation: Devesh Kumar (Director), Piyush Kumar Pandey (Head  
42 Clinical Operations), Shaitan Singh (Assistant Project Manager), Charanpreet Arora (Clinical research  
43 associate)  
44  
45

### 46 **DEFEAT COVID Investigators:**

47 Ashford and St Peter's Hospital NHS Foundation Trust, Ashford, UK: Shashank Sharma, Megan McGee,  
48 Kieran Brack, Maia Aquino, Rita Pereira, Vicky Frost, Kirsty, Gibson, Maria Croft, Fatima Omar, Kapila  
49 Ranasinghe,  
50

51 Kingston Hospital NHS Foundation Trust, Kingston upon Thames, UK: Siva Mahendran, Anna Joseph, Maggie  
52 Grout  
53

54 Max Hospital, New Delhi India: Arun Dewan, Ritesh Aggarwal

55 Meditrina Institute, Nagpur, India: Ajay Bulle

56 Noble Hospital, Pune, India: Aparna Kodre  
57  
58  
59  
60

**Authors' contributions**

All designated authors meet all four ICMJE criteria for authorship. The funders and the sponsor of the study had no role in the analyses or the interpretation of the results.

ZC, NM, HLL, SRKS, LL, JB, SL, IJ, DF and PS made substantial contribution to the conception and design of the study. SS, AK, AB, RA, KB, MM, KR, FO, KL, AL, SRKS, JB, HLL, NM, IKH and ZC made substantial contribution to the acquisition, analysis and interpretation of the data for the study. All authors contributed to the drafting, revision and final approval of the manuscript. ZC, NM and LL are responsible for the overall content.

**Competing interests**

All authors have completed the ICMJE uniform disclosure form at [www.icmje.org/disclosure-of-interest/](http://www.icmje.org/disclosure-of-interest/) and declare no competing interests.

**Dissemination**

A summary of the results will be disseminated to the participants by principal investigators at each trial site via a newsletter.

**Licensing Statement**

The Submitting Author has the right to grant and does grant on behalf of all authors of the Work (as defined in the author licence), an exclusive licence and/or a non-exclusive licence for contributions from authors who are: i) UK Crown employees; ii) where BMJ has agreed a CC-BY licence shall apply, and/or iii) in accordance with the terms applicable for US Federal Government officers or employees acting as part of their official duties; on a worldwide, perpetual, irrevocable, royalty-free basis to BMJ Publishing Group Ltd ("BMJ") its licensees.

**Funding**

This work was supported by LifeArc, a UK registered charity number 1015243 (Grant number not applicable).

## References

1. <https://COVID19.who.int/>
2. Chen YL, Quach TTT, COVID-19 cytokine storm syndrome: a threshold concept. *Lancet Microbe*. 2021 Feb;2(2):e49-e50.doi: 10.1016/S2666-5247(20)30223-8.Epub 2021 Feb 2
3. Gavriatopoulou M, Ntanasis-Stathopoulos I, Korompoki E, Fotiou D, Migkou M, Tzanninis IG, Psaltopoulou T, Kastritis E, Terpos E, Dimopoulos MA. Emerging treatment strategies for COVID-19 infection. *Clin Exp Med*. 2021 May;21(2):167-179. doi: 10.1007/s10238-020-00671-y. Epub 2020 Oct 30. PMID: 33128197; PMCID: PMC759894
4. Dwek, Raymond A et al. "Targeting glycosylation as a therapeutic approach." *Nature reviews. Drug discovery* vol. 1,1 (2002): 65-75. doi:10.1038/nrd708
5. Angus, Derek C et al. "The REMAP-CAP (Randomized Embedded Multifactorial Adaptive Platform for Community-acquired Pneumonia) Study. Rationale and Design." *Annals of the American Thoracic Society* vol. 17,7 (2020): 879-891. doi:10.1513/AnnalsATS.202003-192SD
6. Alfaro-Lara, et al. Systematic review and meta-analysis of the efficacy and safety of leflunomide and methotrexate in the treatment of rheumatoid arthritis. *Reumatol Clin*. 2019 May - Jun;15(3):133-1
7. Xiong R, Zhang L, Li S, Sun Y, Ding M, Wang Y, Zhao Y, Wu Y, Shang W, Jiang X, Shan J, Shen Z, Tong Y, Xu L, Chen Y, Liu Y, Zou G, Lavillete D, Zhao Z, Wang R, Zhu L, Xiao G, Lan K, Li H, Xu K. Novel and potent inhibitors targeting DHODH are broad-spectrum antivirals against RNA viruses including newly-emerged coronavirus SARS-CoV-2. *Protein Cell*. 2020 Oct;11(10):723-739. doi: 10.1007/s13238-020-00768-w. Epub 2020 Aug 4. Erratum in: *Protein Cell*. 2021 Jan;12(1):76-80. Erratum in: *Protein Cell*. 2020 Nov 9;: PMID: 32754890; PMCID: PMC7402641.
8. Yao, H. W.; Li, J.; Chen, J. Q.; Xu, S. Y. A 771726, the active metabolite of leflunomide, inhibits TNF- $\alpha$  and IL-1 from Kupffer cells. *Inflammation* 2004, 28 (2), 97-103.
9. Li, L. et al. The effects of teriflunomide on lymphocyte subpopulations in human peripheral blood mononuclear cells in vitro. *J. Neuroimmunol*. 2013, 265 (1-2), 82-90.
10. <https://www.rcplondon.ac.uk/projects/outputs/national-early-warning-score-news-2>
11. [https://ctep.cancer.gov/protocoldevelopment/electronic\\_applications/ctc.htm#ctc\\_60](https://ctep.cancer.gov/protocoldevelopment/electronic_applications/ctc.htm#ctc_60)
12. Mandal S, Barnett J, Brill SE ARC Study Group, et al. 'Long-COVID': a cross-sectional study of persisting symptoms, biomarker and imaging abnormalities following hospitalisation for COVID-19. *Thorax* 2021;76:396-398.
13. <http://www.who.int/blueprint/priority-diseases/key-action/novel-coronavirus/en/>.
14. Machin D, Campbell M, Fayers, P, Pinol A (1997) *Sample Size Tables for Clinical Studies*. Second Ed. Blackwell Science IBSN 0-86542-870-0 p. 176-177
15. Hu, Ke et al. "A Small-Scale Medication of Leflunomide as a Treatment of COVID-19 in an Open-Label Blank-Controlled Clinical Trial." *Virologica Sinica* vol. 35,6 (2020): 725-733. doi:10.1007/s12250-020-00258-7
16. Wang, Qiang et al. "Efficacy and Safety of Leflunomide for Refractory COVID-19: A Pilot Study." *Frontiers in pharmacology* vol. 12 581833. 2 Jul. 2021, doi:10.3389/fphar.2021.581833

17. Mengmei Wang, Yang Zhao, Weihua Hu, Dong Zhao, Yunting Zhang, Tao Wang, Zhishui Zheng, Xiaochen Li, Shaolin Zeng, Zhenlian Liu. Treatment of Coronavirus Disease 2019 Patients With Prolonged Postsymptomatic Viral Shedding With Leflunomide: A Single-center Randomized Controlled Clinical Trial. *Clinical Infectious Diseases*, Volume 73, Issue 11, 1 December 2021, Pages e4012–e4019, <https://doi.org/10.1093/cid/ciaa1417>
18. Huang, Chaolin et al. “Clinical features of patients infected with 2019 novel coronavirus in Wuhan, China.” *Lancet (London, England)* vol. 395,10223 (2020): 497-506. doi:10.1016/S0140-6736(20)30183-5
19. ISARIC Clinical Characterisation Group. “COVID-19 symptoms at hospital admission vary with age and sex: ISARIC multinational study.” *medRxiv : the preprint server for health sciences* 2020.10.26.20219519. 19 Nov. 2020, doi:10.1101/2020.10.26.20219519. Preprint.
20. Chakravarty EF, Sanchez-Yamamoto D, Bush TM. The use of disease modifying antirheumatic drugs in women with rheumatoid arthritis of childbearing age: a survey of practice pattern and pregnancy outcomes. *J Rheumatol.* 2003;30:241–6.
21. Atsushi Ogata, Yasuhiro Kato, Shinji Higa, Kazuyuki Yoshizaki, IL-6 inhibitor for the treatment of rheumatoid arthritis: A comprehensive review, *Modern Rheumatology*, Volume 29, Issue 2, 4 March 2019, Pages 258–267, <https://doi.org/10.1080/14397595.2018.1546357>
22. REMAP-CAP Investigators et al. “Interleukin-6 Receptor Antagonists in Critically Ill Patients with COVID-19.” *The New England journal of medicine* vol. 384,16 (2021): 1491-1502. doi:10.1056/NEJMoa2100433
23. Abani, O., Abbas, A., Abbas, F., Abbas, M., Abbasi, S., Abbass, H., et al. (2021). Tocilizumab in Patients Admitted to Hospital with COVID-19 (RECOVERY): a Randomised, Controlled, Open-Label, Platform Trial. *The Lancet* 397, 1637–1645. doi:10.1016/S0140-6736(21)00676-0
24. WHO Rapid Evidence Appraisal for COVID-19 Therapies (REACT) Working Group et al. “Association Between Administration of Systemic Corticosteroids and Mortality Among Critically Ill Patients With COVID-19: A Meta-analysis.” *JAMA* vol. 324,13 (2020): 1330-1341. doi:10.1001/jama.2020.17023
25. Kraan MC, Smeets TJM, van Loon MJ, et al Differential effects of leflunomide and methotrexate on cytokine production in rheumatoid arthritis *Annals of the Rheumatic Diseases* 2004;63:1056-1061.
26. Wang, Shihang et al. “Molecular evolutionary characteristics of SARS-CoV-2 emerging in the United States.” *Journal of medical virology* vol. 94,1 (2022): 310-317. doi:10.1002/jmv.27331

## Figure legends:

**Figure 1: Randomisation, treatment assignment and follow up of DEFEAT-COVID study participant.**

*\*= immunotherapy included Tocilizumab, Bevacizumab and Interferon alpha and beta.*

**Figure 2: Time to clinical improvement of 2 points on a clinical status scale or discharge prior 28 day in a stratified ITT analysis (primary outcome).**

*Patients who died were censored at the time their death occurred, while all surviving patients who did not reach TICI criteria by day 28 were right censored at that point. Most of the patients were discharged within the first 10 days of admission.*

**Figure 3: Cumulative all-cause mortality (A), oxygen dependence (B) by 28 days**

**Figure 4: Mean changes in log<sup>10</sup> viral load (copies/ml) from baseline.**

*Error bars represent standard error. Numbers in the bars represent the number of samples available for measurements.*

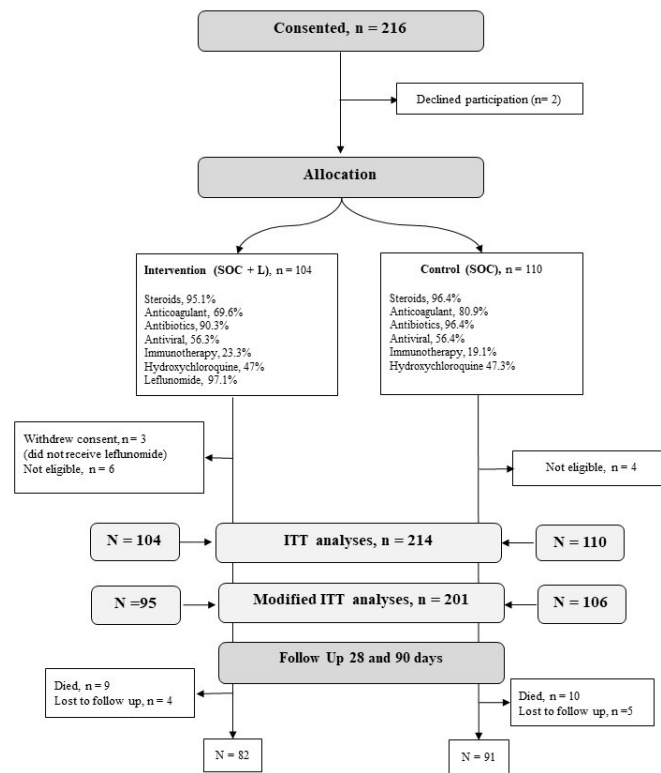

Randomisation, treatment assignment and follow up of DEFEAT-COVID study participant.  
 \*= immunotherapy included Tocilizumab, Bevacizumab and Interferon alpha and beta.

190x338mm (96 x 96 DPI)



|       |     |    |    |    |   |   |
|-------|-----|----|----|----|---|---|
| SOC   | 110 | 90 | 31 | 4  | 3 | 1 |
| SOC+L | 104 | 82 | 15 | 10 | 3 | 1 |

Patients who died were censored at the time their death occurred, while all surviving patients who did not reach TICI criteria by day 28 were right censored at that point. Most of the patients were discharged within the first 10 days of admission.

338x190mm (96 x 96 DPI)



A)



B)

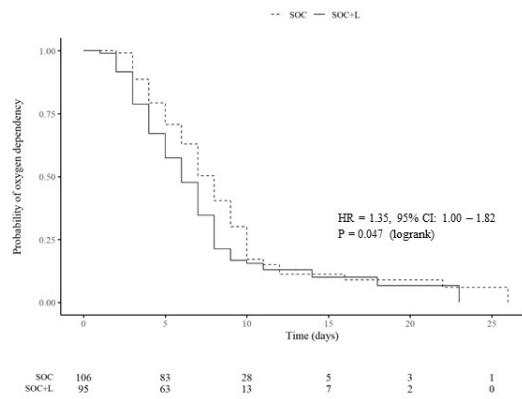

Cumulative all-cause mortality (A), oxygen dependence (B) by 28 days

190x338mm (96 x 96 DPI)



Mean changes in log<sub>10</sub> viral load (copies/ml) from baseline. Error bars represent standard error. Numbers in the bars represent the number of samples available for measurements.

338x190mm (96 x 96 DPI)

| Trial procedures                                                                                         | Screening | Day 0/1 (BL) | Daily          | Day 3          | Day 7 | Day 11 +/- 1 | Day 15 +/- 1 | Day 28 +/- 1   | DC             | Day 90 +/- 7   |
|----------------------------------------------------------------------------------------------------------|-----------|--------------|----------------|----------------|-------|--------------|--------------|----------------|----------------|----------------|
| Confirmation of COVID Infection and severity                                                             | X         |              |                |                |       |              |              |                |                |                |
| Informed consent & Eligibility Assessment                                                                | X         |              |                |                |       |              |              |                |                |                |
| Demographics, Medical Hx, Cardiopulmonary Assessment (including ECG <sup>1</sup> & Echo <sup>2</sup> )   | X         |              |                |                |       |              |              |                |                |                |
| Concomitant medication                                                                                   |           | X            | X              |                |       |              |              | X <sup>7</sup> |                | X              |
| Bloods – FBC, U&Es, LFT (AST <sup>6</sup> & ALT <sup>6</sup> )                                           |           | X            | X <sup>5</sup> | X <sup>6</sup> |       |              |              |                | X              |                |
| – Clotting screen, Fibrinogen, D-Dimer, Ferritin                                                         |           | X            | X <sup>5</sup> |                |       |              |              |                |                |                |
| – Glucose                                                                                                |           | X            | X <sup>5</sup> |                |       |              |              |                |                |                |
| – Creatine Kinase, Troponin, BNP (NT-proBNP)                                                             |           | X            | X <sup>5</sup> |                |       |              |              |                |                |                |
| – Procalcitonin, CRP, LDH                                                                                |           | X            | X <sup>5</sup> | X              |       | X            |              |                |                |                |
| – HIV                                                                                                    |           | X            |                |                |       |              |              |                |                |                |
| – Cytokine profile                                                                                       |           | X            |                | X              |       | X            |              |                | X <sup>8</sup> |                |
| Pregnancy test (urine sample)                                                                            |           | X            |                |                |       |              |              |                |                |                |
| Viral Load (nasopharyngeal swab)                                                                         |           | X            |                |                | X     | X            | X            | X              | X <sup>8</sup> |                |
| Randomisation                                                                                            |           | X            |                |                |       |              |              |                |                |                |
| IMP dispense, loading (daily from Day 0/1 to 3) / maintenance dose (daily from Day 4 to 10) <sup>3</sup> |           | X            |                |                |       |              |              |                |                |                |
| Primary outcome assessment (TTCI)                                                                        |           | X            | X              |                |       |              |              | X <sup>7</sup> |                |                |
| Clinical Assessment, e.g. NEWS 2, body T°C*, vital signs, imaging**                                      | X         | X            | X <sup>5</sup> |                |       |              |              |                |                |                |
| *Blood and Urine cultures (in presence of fever)                                                         |           | X            | X <sup>5</sup> |                |       |              |              |                |                |                |
| **Urine for legionella and pneumococcal                                                                  |           | X            | X <sup>5</sup> |                |       |              |              |                |                |                |
| Oxygenation assessment e.g. O <sub>2</sub> delivery method and level [SpO <sub>2</sub> ]                 |           | X            | X <sup>5</sup> |                |       |              |              |                |                |                |
| Arterial Blood Gas (ABG) – as available and where applicable                                             |           | X            | X <sup>5</sup> |                |       |              |              |                |                |                |
| Serious Adverse Event(s) (SAE(s))/ Adverse Event(s) (AE(s)) <sup>4</sup>                                 |           |              | X              |                |       |              |              | X <sup>7</sup> |                | X <sup>9</sup> |
| Out-patient assessment (telephone call)                                                                  |           |              |                |                |       |              |              | X <sup>7</sup> |                | X              |

### Data collected and study time points

**Key:** BL – Baseline; IMP – Investigation Medicinal Product (trial treatment i.e. trial drug); SOC - Standard of Care; DC Discharge.

**Notes:** **1.** Check medical notes, if abnormal flag repeat imaging; **2.** Echo within 6 months to be used if no cardiac symptoms; **3.** Participant to take home IMP if DC'd; **4.** Participant to self-report events between DC to Day 90; **5.** Completed Daily, depending on clinical need and resources. If participant is DC'd early – record what is available as part of SOC; **6.** AST/ALT *must* be checked for treatment arm to determine maintenance dose; **7.** Participant DC'd called on Day 28 for Treatment Assessments, if not seen on-site; **8.** Cytokines/Viral Load to be collected if outside of scheduled collection. Day 11 is the last collection for Cytokines. on DC Medium (telephone call) and long term (by Sponsor) Treatment Assessments respectively.

1  
2  
3  
4  
5  
6  
7  
8  
9  
10  
11  
12  
13  
14  
15  
16  
17  
18  
19  
20  
21  
22  
23  
24  
25  
26  
27  
28  
29  
30  
31  
32  
33  
34  
35  
36  
37  
38  
39  
40  
41  
42  
43  
44  
45  
46  
47  
48  
49  
50  
51  
52  
53  
54  
55  
56  
57  
58  
59  
60

| Centre      | Group        | N   | Corticosteroid | Anticoagulant | Antiviral | Antibiotic | Immunotherapy* | Hydroxychloroquine |
|-------------|--------------|-----|----------------|---------------|-----------|------------|----------------|--------------------|
| UK          | Intervention | 30  | 100%           | 97%           | 69%       | 100%       | 14%            | 3%                 |
|             | Control      | 36  | 100%           | 100%          | 81%       | 100%       | 3%             | 3%                 |
| India       | Intervention | 74  | 87%            | 76%           | 70%       | 76%        | 67%            | 93%                |
|             | Control      | 74  | 89%            | 84%           | 70%       | 88%        | 50%            | 94%                |
| All Centres | Intervention | 104 | 95%            | 79%           | 56%       | 90%        | 23%            | 47%                |
|             | Control      | 110 | 96%            | 80%           | 56%       | 96%        | 19%            | 47%                |

**Supplementary Table 1: Standard of care therapy in the UK and India**

*\*The "Immunotherapy" includes tocilizumab, bevacizumab, interferon alpha and beta*

| Adverse events categorised per MedDRA terminology   |                    |                  |
|-----------------------------------------------------|--------------------|------------------|
|                                                     | SOC+L<br>(n = 104) | SOC<br>(n = 110) |
| Patients with at least one reported AE, n (%)       | 56 (53.8%)         | 42 (38.2%)       |
| All adverse events, n                               | 121                | 91               |
| Blood and lymphatic system disorder                 |                    |                  |
| - DIC                                               | 1                  | 4                |
| - Lymph node enlargement                            | 1                  | 0                |
| - Hilar lymphadenopathy                             | 1                  | 0                |
| - Thrombocytopenia                                  | 4                  | 4                |
| - Neutropenia                                       | 0                  | 1                |
| - Splenomegaly                                      | 1                  | 0                |
| Cardiac Disorder                                    |                    |                  |
| - Acute coronary syndrome                           | 2                  | 1                |
| - Aortic Valve disease                              | 2                  | 0                |
| - Atrial fibrillation                               | 2                  | 5                |
| - Chest pain                                        | 1                  | 0                |
| - Left ventricular systolic dysfunction             | 1                  | 0                |
| - Conduction disorder                               | 0                  | 1                |
| - Infective endocarditis                            | 1                  | 0                |
| - Tachycardia (sinus)                               | 2                  | 0                |
| Endocrine disorder                                  |                    |                  |
| - Adrenal adenoma                                   | 1                  | 0                |
| Eye disorder                                        |                    |                  |
| - Dry eye                                           | 0                  | 1                |
| General disorders and administration site condition |                    |                  |
| - Lethargy                                          | 1                  | 0                |
| Gastrointestinal disorders                          |                    |                  |
| - Diarrhoea                                         | 1                  | 1                |
| - Gastritis                                         | 1                  | 0                |
| - Gastric haemorrhage                               | 2                  | 0                |

|                                                |    |    |
|------------------------------------------------|----|----|
| - Hiatus hernia                                | 1  | 0  |
| - Rectal haemorrhage                           | 0  | 1  |
| - Mucositis oral                               | 1  | 0  |
| - Dyspepsia                                    | 2  | 0  |
| - Emesis                                       | 1  | 0  |
| Hepatobiliary disorders                        |    |    |
| - Acute liver dysfunction                      | 1  | 1  |
| - Cholelithiasis                               | 2  | 0  |
| - Hepatic granuloma                            | 1  | 0  |
| - Liver steatosis                              | 1  | 0  |
| Infection and infestations                     |    |    |
| - Sepsis                                       | 0  | 1  |
| Investigation                                  |    |    |
| - APTT prolonged                               | 1  | 0  |
| - ALP increased                                | 1  | 0  |
| - Bil increased                                | 3  | 0  |
| - Il-6 increased                               | 1  | 0  |
| - Leucocytosis                                 | 1  | 2  |
| - ALT/AST increased                            | 27 | 12 |
| - Sgot increased                               | 2  | 0  |
| Metabolism and nutrition disorder              |    |    |
| - Hyperglycaemia                               | 2  | 6  |
| - Hyperkalaemia                                | 0  | 1  |
| - Hyponatraemia                                | 1  | 1  |
| - hypomagnesaemia                              | 0  | 1  |
| Musculoskeletal and connective tissue disorder |    |    |
| - Discitis                                     | 1  | 0  |
| Neoplasms                                      |    |    |
| - Lung cancer                                  | 1  | 0  |
| Nervous system disorder                        |    |    |
| - 6 <sup>th</sup> nerve palsy                  | 0  | 1  |

|                                                |   |   |
|------------------------------------------------|---|---|
| - Dysphasia                                    | 0 | 1 |
| - Cognitive disturbances                       | 1 | 0 |
| - Cerebellar calcification                     | 0 | 1 |
| - Lower limb weakness                          | 1 | 0 |
| - Dysphagia                                    | 0 | 1 |
| - Hemiparesis                                  | 0 | 1 |
| - Headache                                     | 1 | 0 |
| - Intracranial haemorrhage                     | 0 | 1 |
| Psychiatric disorders                          |   |   |
| - Anxiety                                      | 2 | 1 |
| - Delirium                                     | 0 | 2 |
| Renal and urinary disorders                    |   |   |
| - Acute kidney injury                          | 5 | 5 |
| - Haematuria                                   | 1 | 0 |
| - Urinary urgency                              | 1 | 0 |
| Respiratory thoracic and mediastinal disorders |   |   |
| - ARDS                                         |   |   |
| - Wheezing                                     | 1 | 0 |
| - Atelectasis                                  | 0 | 1 |
| - Hypoxia                                      | 0 | 1 |
| - Exacerbation of COPD                         | 5 | 7 |
| - Hoarseness                                   | 3 | 2 |
| - Dyspnoea                                     | 0 | 1 |
| - Pneumonitis                                  | 4 | 3 |
| - Epistaxis                                    | 1 | 0 |
| - Haemoptysis                                  | 3 | 1 |
| - Respiratory failure                          | 0 | 1 |
| - Pneumothorax                                 | 2 | 0 |
| - (subcutaneous emphysema)                     | 0 | 1 |
|                                                | 0 | 1 |
| Reproductive system and breast disorders       |   |   |
| - Endometrium thickening                       | 1 | 0 |

|                                 |   |    |
|---------------------------------|---|----|
| Surgical and medical procedures |   |    |
| - Aortic valve replacement      | 1 | 0  |
| - Loop recorder implant         | 0 | 1  |
| Vascular disorder               |   |    |
| - Aortic aneurysm               | 1 | 0  |
| - Thromboembolic events         |   |    |
| ○ DVT                           | 1 | 0  |
| ○ Bilateral pedal vasculopathy  | 0 | 1  |
| ○ Pulmonary embolism            | 1 | 1  |
| - Hypertension                  | 0 | 1  |
| Death                           | 9 | 10 |

**Supplementary Table 2: All adverse events**



|                                                             |                         | Baseline      |            | Day 1 – 3/4      |            | Day 4/5 – Discharge |            |
|-------------------------------------------------------------|-------------------------|---------------|------------|------------------|------------|---------------------|------------|
|                                                             |                         | UK            | India      | UK               | India      | UK                  | India      |
| <b>ALT</b>                                                  |                         |               |            |                  |            |                     |            |
| <b>SOC + L</b>                                              | <b>Median (IQR) U/L</b> | 48 (30-60)    |            | 67 (36-87)       |            | 44 (36-71)          |            |
|                                                             |                         | 48 (32-71)    | 47 (29-59) | 59 (37-94)       | 72 (34-86) | 62(34-151)          | 42(35-56)  |
|                                                             | <b>1 - 2 x ULN (n)</b>  | 44            |            | 50               |            | 17                  |            |
|                                                             |                         | 12            | 32         | 9                | 41         | 4                   | 13         |
|                                                             | <b>2 - 3 x ULN (n)</b>  | 1             |            | 6                |            | 6                   |            |
|                                                             |                         | 1             | 0          | 3                | 3          | 2                   | 4          |
|                                                             | <b>&gt; 3 x ULN (n)</b> | 1             |            | 8                |            | 5                   |            |
|                                                             |                         | 1             | 0          | 3                | 5          | 4                   | 1          |
|                                                             | <b>&gt;ULN</b>          | 14            |            | 49               |            | 18                  |            |
|                                                             |                         |               |            |                  |            |                     |            |
| <b>SOC</b>                                                  | <b>Median (IQR) U/L</b> | 39 (26-56)    |            | 44 (34-65)       |            | 41 (35-52)          |            |
|                                                             |                         | 40 (27-59)    | 38 (25-54) | 44 (31-63)       | 44 (36-67) | 49 (33-63)          | 40 (35-52) |
|                                                             | <b>1 - 2 x ULN (n)</b>  | 33            |            | 29               |            | 24                  |            |
|                                                             |                         | 13            | 20         | 8                | 21         | 7                   | 17         |
|                                                             | <b>2 - 3 x ULN (n)</b>  | 0             |            | 9                |            | 3                   |            |
|                                                             |                         | 0             | 0          | 2                | 7          | 2                   | 1          |
|                                                             | <b>&gt;3 x ULN (n)</b>  | 0             |            | 0                |            | 0                   |            |
|                                                             |                         | 0             | 0          | 0                | 0          | 0                   | 0          |
|                                                             | <b>&gt;ULN</b>          | 13            |            | 28               |            | 18                  |            |
|                                                             |                         |               |            |                  |            |                     |            |
| <b>p value of abnormal ALT counts between SOC+L and SOC</b> |                         | <b>0.049</b>  |            | <b>&lt;0.001</b> |            | <b>0.633</b>        |            |
| <b>AST</b>                                                  |                         |               |            |                  |            |                     |            |
| <b>SOC + L</b>                                              | <b>Median (IQR) U/L</b> | 44 (30-54)    |            | 55(31-77)        |            | 41(27-50)           |            |
|                                                             |                         | 60 (42-102)   | 43(29-50)  | 58 (42-104)      | 53 (28-76) | 54 (29-102)         | 40 (27-49) |
|                                                             | <b>1 - 2 x ULN (n)</b>  | 28            |            | 36               |            | 18                  |            |
|                                                             |                         | 4             | 24         | 8                | 28         | 3                   | 15         |
|                                                             | <b>2 - 3 x ULN (n)</b>  | 2             |            | 9                |            | 1                   |            |
|                                                             |                         | 2             | 0          | 2                | 7          | 1                   | 0          |
|                                                             | <b>&gt; 3 x ULN (n)</b> | 1             |            | 6                |            | 1                   |            |
|                                                             |                         | 1             | 0          | 2                | 4          | 1                   | 0          |
|                                                             | <b>&gt;ULN</b>          | 7             |            | 39               |            | 15                  |            |
|                                                             |                         |               |            |                  |            |                     |            |
| <b>SOC</b>                                                  | <b>Median (IQR) U/L</b> | 39 (28-52)    |            | 39 (29-54)       |            | 37(27-47)           |            |
|                                                             |                         | 57 (34-75)    | 37(26-48)  | 45(38-55)        | 38(28-54)  | 45 (35-61)          | 37 (25-46) |
|                                                             | <b>1 - 2 x ULN (n)</b>  | 22            |            | 18               |            | 16                  |            |
|                                                             |                         | 6             | 16         | 4                | 14         | 4                   | 12         |
|                                                             | <b>2 - 3 x ULN (n)</b>  | 2             |            | 5                |            | 0                   |            |
|                                                             |                         | 2             | 0          | 0                | 5          | 0                   | 0          |
|                                                             | <b>&gt;3 x ULN (n)</b>  | 0             |            | 1                |            | 1                   |            |
|                                                             |                         | 0             | 0          | 0                | 1          | 1                   | 0          |
|                                                             | <b>&gt;ULN</b>          | 8             |            | 20               |            | 12                  |            |
|                                                             |                         |               |            |                  |            |                     |            |
| <b>p value of abnormal ALT counts between SOC+L and SOC</b> |                         | <b>0.3222</b> |            | <b>&lt;0.001</b> |            | <b>0.318</b>        |            |

### Supplementary Table 3: Liver enzymes measurements

ULN: upper limits of normal (ALT: 10-49 U/L; AST 19 – 48U/L). ALT: alanine transaminase. AST: aspartate transaminase; SOC + L: n = 30 UK, 74 India; SOC: n = 36 UK, 74 India

1  
2  
3  
4  
5  
6  
7  
8  
9  
10  
11  
12  
13  
14  
15  
16  
17  
18  
19  
20  
21  
22  
23  
24  
25  
26  
27  
28  
29  
30  
31  
32  
33  
34  
35  
36  
37  
38  
39  
40  
41  
42  
43  
44  
45  
46  
47  
48  
49  
50  
51  
52  
53  
54  
55  
56  
57  
58  
59  
60

|                           | Day 28          |                 |               |                 |       | Day 90          |                 |               |                 |    |
|---------------------------|-----------------|-----------------|---------------|-----------------|-------|-----------------|-----------------|---------------|-----------------|----|
|                           | SOC+L<br>(n=81) |                 | SOC<br>(n=91) |                 | p*    | SOC+L<br>(n=81) |                 | SOC<br>(n=91) |                 | p* |
|                           | %               | Median<br>(IQR) | %             | Median (IQR)    |       | %               | Median (IQR)    | %             | Median (IQR)    |    |
| <b>Fatigue</b>            | 29.6            | 5.00(2.75-8.00) | 31.9          | 5.00(3.00-8.00) | 0.751 | 22.2            | 5.00(3.25-7.00) | 26.4          | 3.00(2.00-4.25) | NS |
| <b>Cough</b>              | 13.6            | 2.00(1.00-4.50) | 18.7          | 2.00(1.00-4.00) | 0.366 | 7.41            | 1.00(1.00-6.25) | 8.79          | 2.50(1.00-3.50) | NS |
| <b>Anxiety</b>            | 24.7            | 3.50(2.00-7.25) | 19.8          | 4.00(3.00-7.75) | 0.438 | 21.0            | 3.00(1.00-5.00) | 19.8          | 2.00(1.00-3.75) | NS |
| <b>Chest pains</b>        | 11.1            | 4.00(2.00-7.00) | 8.79          | 4.00(2.50-5.00) | 0.611 | 7.41            | 4.00(3.25-7.75) | 6.59          | 3.00(1.25-7.75) | NS |
| <b>Brain fog</b>          | 14.8            | 5.00(3.75-7.25) | 16.5          | 5.00(1.50-7.00) | 0.764 | 14.8            | 3.50(1.75-5.00) | 12.1          | 4.00(2.50-4.50) | NS |
| <b>Breathlessness</b>     | 40.7            | 2.00(1.00-6.00) | 42.9          | 1.00(1.00-7.00) | 0.779 | 22.2            | 5.00(1.00-7.00) | 20.9          | 4.00(2.00-4.00) | NS |
| <b>Sleep quality</b>      | 48.2            | 2.00(1.00-5.00) | 38.5          | 3.00(1.00-6.00) | 0.200 | 34.6            | 2.00(1.00-4.25) | 33.0          | 2.50(1.00-5.75) | NS |
| <b>Palpitations</b>       | 8.64            | 7.00(1.50-9.00) | 5.49          | 1.00(1.00-7.00) | 0.419 | 4.94            | 4.50(3.50-5.00) | 3.30          | 1.00(1.00-4.00) | NS |
| <b>Joint pain</b>         | 32.1            | 3.00(1.00-4.75) | 33.0          | 2.00(1.00-4.00) | 0.903 | 22.2            | 3.50(2.00-7.00) | 19.8          | 2.00(2.00-4.50) | NS |
| <b>Myalgia</b>            | 18.5            | -               | 19.8          |                 | 0.834 | 17.3            |                 | 11.0          |                 | NS |
| <b>Anosmia</b>            | 6.17            | -               | 11.0          |                 | 0.264 | 2.47            |                 | -             |                 | -  |
| <b>Loss of taste</b>      | 9.88            | -               | 14.3          |                 | 0.378 | 7.41            |                 | -             |                 | -  |
| <b>Depression</b>         | 19.8            | 1.50(1.00-3.00) | 18.7          | 1.00(1.00-2.00) | 0.859 | 11.1            | 1.00(1.00-1.00) | 11.0          | 1.00(1.00-2.00) | NS |
| <b>Loss of interest</b>   | 12.4            | 2.50(1.25-3.00) | 16.5          | 1.00(1.00-3.00) | 0.442 | 9.88            | 1.00(1.00-1.25) | 7.69          | 1.00(1.00-2.50) | NS |
| <b>Dyspnoea; Mild (1)</b> | 59.3            | 1.00(1.00-2.00) | 47.3          | 2.00(1.00-2.00) | 0.155 | 80.3            | 1.00(1.00-1.00) | 81.3          | 1.00(1.00-1.00) | NS |
| <b>Moderate (2-3)</b>     | 29.6            |                 | 39.6          |                 | 0.173 | 14.8            |                 | 17.6          |                 |    |
| <b>Severe (4-5)</b>       | 11.1            |                 | 13.2          |                 | 0.678 | 4.94            |                 | 1.10          |                 |    |

#### Supplementary Table 4: Long COVID symptoms at 28 and 90 days after randomisation

*p*: alpha value. Statistical significance was assumed at 0.05 alpha value. To best summarise the data, symptom scales (e.g. 0-10) for all symptoms (except dyspnoea, which was measured in different terms) were binarized, accepting any score above 0 as prevalence (%) of experiencing that symptom. To reflect magnitude of symptom severity, median (IQR) of individual symptom scores (except for dyspnoea, myalgia, anosmia and loss of taste) were taken excluding scores of 0. For dyspnoea, prevalence (%) of the symptom was determined as the proportion of patients scoring any relevant category (e.g., mild, moderate, severe), and median (IQR) of symptom severity included all score values. Between-group differences at each point of follow-up (day 28 and day 90) for all symptoms were evaluated using patient proportions from the binarized symptom scales via the chi-square test of differences. The Shapiro-wilk test was used to assess statistical normality. No analysis was enabled for any day reporting  $n \leq 3$  datapoints per group for statistical reliability



## CONSORT 2010 checklist of information to include when reporting a randomised trial\*

| Section/Topic                    | Item No | Checklist item                                                                                                                                                                              | Reported on page No |
|----------------------------------|---------|---------------------------------------------------------------------------------------------------------------------------------------------------------------------------------------------|---------------------|
| <b>Title and abstract</b>        |         |                                                                                                                                                                                             |                     |
|                                  | 1a      | Identification as a randomised trial in the title                                                                                                                                           | 1                   |
|                                  | 1b      | Structured summary of trial design, methods, results, and conclusions (for specific guidance see CONSORT for abstracts)                                                                     | 2                   |
| <b>Introduction</b>              |         |                                                                                                                                                                                             |                     |
| Background and objectives        | 2a      | Scientific background and explanation of rationale                                                                                                                                          | 4,5,6               |
|                                  | 2b      | Specific objectives or hypotheses                                                                                                                                                           | 5,6                 |
| <b>Methods</b>                   |         |                                                                                                                                                                                             |                     |
| Trial design                     | 3a      | Description of trial design (such as parallel, factorial) including allocation ratio                                                                                                        | 4,5,6               |
|                                  | 3b      | Important changes to methods after trial commencement (such as eligibility criteria), with reasons                                                                                          | NA                  |
| Participants                     | 4a      | Eligibility criteria for participants                                                                                                                                                       | 4                   |
|                                  | 4b      | Settings and locations where the data were collected                                                                                                                                        | 4,5                 |
| Interventions                    | 5       | The interventions for each group with sufficient details to allow replication, including how and when they were actually administered                                                       | 5                   |
| Outcomes                         | 6a      | Completely defined pre-specified primary and secondary outcome measures, including how and when they were assessed                                                                          | 5,6,7               |
|                                  | 6b      | Any changes to trial outcomes after the trial commenced, with reasons                                                                                                                       | NA                  |
| Sample size                      | 7a      | How sample size was determined                                                                                                                                                              | 6                   |
|                                  | 7b      | When applicable, explanation of any interim analyses and stopping guidelines                                                                                                                | NA                  |
| <b>Randomisation:</b>            |         |                                                                                                                                                                                             |                     |
| Sequence generation              | 8a      | Method used to generate the random allocation sequence                                                                                                                                      | 4                   |
|                                  | 8b      | Type of randomisation; details of any restriction (such as blocking and block size)                                                                                                         | 5                   |
| Allocation concealment mechanism | 9       | Mechanism used to implement the random allocation sequence (such as sequentially numbered containers), describing any steps taken to conceal the sequence until interventions were assigned | NA                  |
| Implementation                   | 10      | Who generated the random allocation sequence, who enrolled participants, and who assigned participants to interventions                                                                     | 4,5                 |
| Blinding                         | 11a     | If done, who was blinded after assignment to interventions (for example, participants, care providers, those                                                                                | NA                  |

|                                                      |     |                                                                                                                                                   |                  |
|------------------------------------------------------|-----|---------------------------------------------------------------------------------------------------------------------------------------------------|------------------|
|                                                      |     | assessing outcomes) and how                                                                                                                       |                  |
|                                                      | 11b | If relevant, description of the similarity of interventions                                                                                       | NA               |
| Statistical methods                                  | 12a | Statistical methods used to compare groups for primary and secondary outcomes                                                                     | 5,6              |
|                                                      | 12b | Methods for additional analyses, such as subgroup analyses and adjusted analyses                                                                  | 5,6              |
| <b>Results</b>                                       |     |                                                                                                                                                   |                  |
| Participant flow (a diagram is strongly recommended) | 13a | For each group, the numbers of participants who were randomly assigned, received intended treatment, and were analysed for the primary outcome    | Figure 1, page 7 |
|                                                      | 13b | For each group, losses and exclusions after randomisation, together with reasons                                                                  | Figure 1, page 7 |
| Recruitment                                          | 14a | Dates defining the periods of recruitment and follow-up                                                                                           | 7                |
|                                                      | 14b | Why the trial ended or was stopped                                                                                                                | NA               |
| Baseline data                                        | 15  | A table showing baseline demographic and clinical characteristics for each group                                                                  | Table 1          |
| Numbers analysed                                     | 16  | For each group, number of participants (denominator) included in each analysis and whether the analysis was by original assigned groups           | 7, Figure 1      |
| Outcomes and estimation                              | 17a | For each primary and secondary outcome, results for each group, and the estimated effect size and its precision (such as 95% confidence interval) | 5,6              |
|                                                      | 17b | For binary outcomes, presentation of both absolute and relative effect sizes is recommended                                                       | 5,6              |
| Ancillary analyses                                   | 18  | Results of any other analyses performed, including subgroup analyses and adjusted analyses, distinguishing pre-specified from exploratory         | 5,6,7,8,9        |
| Harms                                                | 19  | All important harms or unintended effects in each group (for specific guidance see CONSORT for harms)                                             | NA               |
| <b>Discussion</b>                                    |     |                                                                                                                                                   |                  |
| Limitations                                          | 20  | Trial limitations, addressing sources of potential bias, imprecision, and, if relevant, multiplicity of analyses                                  | 12               |
| Generalisability                                     | 21  | Generalisability (external validity, applicability) of the trial findings                                                                         |                  |
| Interpretation                                       | 22  | Interpretation consistent with results, balancing benefits and harms, and considering other relevant evidence                                     | 13               |
| <b>Other information</b>                             |     |                                                                                                                                                   |                  |
| Registration                                         | 23  | Registration number and name of trial registry                                                                                                    | 2                |
| Protocol                                             | 24  | Where the full trial protocol can be accessed, if available                                                                                       | NA               |
| Funding                                              | 25  | Sources of funding and other support (such as supply of drugs), role of funders                                                                   | 2,13             |

\*We strongly recommend reading this statement in conjunction with the CONSORT 2010 Explanation and Elaboration for important clarifications on all the items. If relevant, we also recommend reading CONSORT extensions for cluster randomised trials, non-inferiority and equivalence trials, non-pharmacological treatments, herbal interventions, and pragmatic trials. Additional extensions are forthcoming: for those and for up to date references relevant to this checklist, see [www.consort-statement.org](http://www.consort-statement.org).

# BMJ Open

## Leflunomide Treatment for Patients Hospitalised with COVID-19: DEFEAT-COVID Randomised Controlled Trial

|                                 |                                                                                                                                                                                                                                                                                                                                                                                                                                                                                                                                                                                                                                                                                                                                                                                                                                                                                                                                                                                                                                                                                                                                                                                                                                                                                                                      |
|---------------------------------|----------------------------------------------------------------------------------------------------------------------------------------------------------------------------------------------------------------------------------------------------------------------------------------------------------------------------------------------------------------------------------------------------------------------------------------------------------------------------------------------------------------------------------------------------------------------------------------------------------------------------------------------------------------------------------------------------------------------------------------------------------------------------------------------------------------------------------------------------------------------------------------------------------------------------------------------------------------------------------------------------------------------------------------------------------------------------------------------------------------------------------------------------------------------------------------------------------------------------------------------------------------------------------------------------------------------|
| Journal:                        | <i>BMJ Open</i>                                                                                                                                                                                                                                                                                                                                                                                                                                                                                                                                                                                                                                                                                                                                                                                                                                                                                                                                                                                                                                                                                                                                                                                                                                                                                                      |
| Manuscript ID                   | bmjopen-2022-068179.R3                                                                                                                                                                                                                                                                                                                                                                                                                                                                                                                                                                                                                                                                                                                                                                                                                                                                                                                                                                                                                                                                                                                                                                                                                                                                                               |
| Article Type:                   | Original research                                                                                                                                                                                                                                                                                                                                                                                                                                                                                                                                                                                                                                                                                                                                                                                                                                                                                                                                                                                                                                                                                                                                                                                                                                                                                                    |
| Date Submitted by the Author:   | 23-Mar-2023                                                                                                                                                                                                                                                                                                                                                                                                                                                                                                                                                                                                                                                                                                                                                                                                                                                                                                                                                                                                                                                                                                                                                                                                                                                                                                          |
| Complete List of Authors:       | Kralj-Hans, Ines; Ashford and Saint Peter's Hospitals NHS Trust, Li, Kuo; Imperial College London<br>Wesek, Adrian; Imperial College London<br>Lamorgese, Alexia; JB Medical Ltd<br>Omar, Fatima; Ashford and Saint Peter's Hospitals NHS Trust<br>Ranasinghe, Kapila; Ashford and Saint Peter's Hospitals NHS Trust<br>McGee, Megan; Ashford and Saint Peter's Hospitals NHS Trust<br>Brack, Kieran; Ashford and Saint Peter's Hospitals NHS Trust<br>Li, Shiliang; East China University of Science and Technology<br>Aggarwal, Ritesh; Max Hospital<br>Bulle, Ajay; Meditrina institute of medical science<br>Kodre, Aparna; Noble Hospital<br>Sharma, Shashank; Ashford and Saint Peter's Hospitals NHS Trust, St Peters Hospital Emergency Department<br>Fluck, David; Ashford and Saint Peter's Hospitals NHS Trust, Cardiology<br>John, Isaac; Ashford and Saint Peter's Hospitals NHS Trust<br>Sharma, Pankaj; Royal Holloway University of London<br>Belsey, Jonathan; JB Medical Ltd<br>Li, Ling; City University, Department of Engineering<br>Seshasai, Sreenivasa Rao Kondapally; St George's University Hospitals NHS Foundation Trust<br>Li, HongLin; Shanghai Key Laboratory of New Drug Design<br>Marczin, N; Imperial College London<br>Chen, Zhong; Ashford and Saint Peter's Hospitals NHS Trust |
| <b>Primary Subject Heading</b>: | Infectious diseases                                                                                                                                                                                                                                                                                                                                                                                                                                                                                                                                                                                                                                                                                                                                                                                                                                                                                                                                                                                                                                                                                                                                                                                                                                                                                                  |
| Secondary Subject Heading:      | Respiratory medicine                                                                                                                                                                                                                                                                                                                                                                                                                                                                                                                                                                                                                                                                                                                                                                                                                                                                                                                                                                                                                                                                                                                                                                                                                                                                                                 |
| Keywords:                       | COVID-19, INFECTIOUS DISEASES, Respiratory infections < THORACIC MEDICINE                                                                                                                                                                                                                                                                                                                                                                                                                                                                                                                                                                                                                                                                                                                                                                                                                                                                                                                                                                                                                                                                                                                                                                                                                                            |
|                                 |                                                                                                                                                                                                                                                                                                                                                                                                                                                                                                                                                                                                                                                                                                                                                                                                                                                                                                                                                                                                                                                                                                                                                                                                                                                                                                                      |

SCHOLARONE™  
Manuscripts

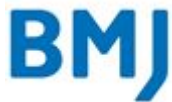

I, the Submitting Author has the right to grant and does grant on behalf of all authors of the Work (as defined in the below author licence), an exclusive licence and/or a non-exclusive licence for contributions from authors who are: i) UK Crown employees; ii) where BMJ has agreed a CC-BY licence shall apply, and/or iii) in accordance with the terms applicable for US Federal Government officers or employees acting as part of their official duties; on a worldwide, perpetual, irrevocable, royalty-free basis to BMJ Publishing Group Ltd ("BMJ") its licensees and where the relevant Journal is co-owned by BMJ to the co-owners of the Journal, to publish the Work in this journal and any other BMJ products and to exploit all rights, as set out in our [licence](#).

The Submitting Author accepts and understands that any supply made under these terms is made by BMJ to the Submitting Author unless you are acting as an employee on behalf of your employer or a postgraduate student of an affiliated institution which is paying any applicable article publishing charge ("APC") for Open Access articles. Where the Submitting Author wishes to make the Work available on an Open Access basis (and intends to pay the relevant APC), the terms of reuse of such Open Access shall be governed by a Creative Commons licence – details of these licences and which [Creative Commons](#) licence will apply to this Work are set out in our licence referred to above.

Other than as permitted in any relevant BMJ Author's Self Archiving Policies, I confirm this Work has not been accepted for publication elsewhere, is not being considered for publication elsewhere and does not duplicate material already published. I confirm all authors consent to publication of this Work and authorise the granting of this licence.

1  
2  
3 **Leflunomide Treatment for Patients Hospitalised with COVID-19: DEFEAT-COVID Randomised**  
4 **Controlled Trial**  
5

6  
7 Authors:

8 Ines Kralj-Hans<sup>1</sup>, Kuo Li<sup>2</sup>, Adrian Wesek<sup>2</sup>, Alexia Lamorgese<sup>4</sup>, Fatima Omar<sup>1</sup>, Kapila Ranasinghe<sup>1</sup>, Megan  
9 McGee<sup>1</sup>, Kieran Brack<sup>1</sup>, Shiliang Li<sup>5</sup>, Ritesh Aggarwal<sup>6</sup>, Ajay Bulle<sup>7</sup>, Aparna Kodre<sup>8</sup>, Shashank Sharma<sup>1</sup>, David  
10 Fluck<sup>1</sup>, Isaac John<sup>1</sup>, Pankaj Sharma<sup>9</sup>, Jonathan Belsey<sup>4</sup>, Ling Li<sup>3</sup>, Sreenivasa Rao Kondapally Seshasai<sup>10</sup>,  
11 \*HongLin Li<sup>5</sup>, \*Nandor Marczin<sup>2</sup>, \*Zhong Chen<sup>1</sup>, on behalf of DEFEAT-COVID Investigators  
12  
13  
14  
15

16  
17 \*Joint senior authors  
18

19 Affiliations:

- 20 1. Ashford and St Peter's Hospital NHS Foundation Trust, UK  
21 2. Faculty of Medicine, Imperial College London, UK  
22 3. City University London, UK  
23 4. JB Medical, UK  
24 5. Shanghai Key Laboratory of New Drug Design, School of Pharmacy, East China University of Science and  
25 Technology, China  
26 6. Max Hospital, New Delhi, India  
27 7. Meditrina institute of medical science, Nagpur, India  
28 8. Noble Hospital, Pune, India  
29 9. Institute of cardiovascular research, Royal Holloway, University of London, UK  
30 10. St George's University Hospitals NHS Foundation Trust, UK  
31  
32  
33  
34  
35  
36  
37

38 Corresponding author: Dr Ines Kralj-Hans, [i.kralj-hans@nhs.net](mailto:i.kralj-hans@nhs.net)

39 Ashford and St Peter's Hospital NHS Foundation Trust, Guildford Street, Chertsey, KT16 0PZ, UK  
40  
41  
42  
43  
44  
45  
46  
47  
48  
49  
50  
51  
52  
53  
54  
55  
56  
57  
58  
59  
60

**Abstract**

Objective: To evaluate the clinical efficacy and safety of leflunomide (L) added to the standard of care (SOC) treatment in COVID-19 patients hospitalised with moderate/critical clinical symptoms.

Design: Prospective, open-label, multicentre, stratified, randomised clinical trial.

Setting: Five hospitals in United Kingdom and India, from September 2020 to May 2021.

Participants: Adults with polymerase-chain-reaction (PCR) confirmed COVID-19 infection with moderate/critical symptoms within 15-days of onset.

Intervention: Leflunomide 100 mg/day (3-days) followed by 10-20 mg/day (7-days) added to standard care.

Primary outcomes: The time to clinical improvement (TTCI) defined as two-point reduction on a clinical status scale or live discharge prior to 28 days; safety profile measured by the incidence of adverse events (AE) within 28 days.

Results: Eligible patients (n=214; age 56.3±14.9 years; 33% female) were randomised to SOC+L (n=104) and SOC group (n=110), stratified according to their clinical risk profile. TTCI was 7 vs. 8 days in SOC+L vs. SOC group (HR 1.317; CI 0.980, 1.768; p=0.070). Incidence of serious adverse events was similar between the groups and none was attributed to leflunomide. In sensitivity analyses, excluding 10 patients not fulfilling the inclusion criteria and 3 who withdrew consent before leflunomide treatment, TTCI was 7 vs. 8 days (HR 1.416, CI 1.041, 1.935; p=0.028), indicating a trend in favour of the intervention group. All-cause mortality rate was similar between groups, 9/104 vs. 10/110. Duration of oxygen dependence was shorter in the SOC+L group being a median 6-days (IQR 4-8) compared to 7-days (IQR 5-10) in SOC group (p=0.047).

Conclusion: Leflunomide, added to the SOC treatment for COVID-19, was safe and well tolerated but had no major impact on clinical outcomes. It may shorten the time of oxygen dependence by one day and thereby improve TTCI /hospital discharge in moderately affected COVID-19 patients.

**Trial registration**

EUDRACT: CTA 21517/0004/001-0001 2020-004994-27

ClinicalTrials.gov: NCT05007678



### Strengths and limitations

- International, prospective, randomised controlled study
- Repurposing a marketed drug with established safety profile and promising dual antiviral and immunomodulating medication based on strong drug discovery data.
- Study participants had milder COVID-19 disease than originally intended, thus eroding the power of the study
- Evolving standard of care therapy possibly diminished measurable benefit of leflunomide

For peer review only

## Introduction

COVID-19 pandemic caused unprecedented strain on health care services around the world. It has affected almost 16 million people globally and caused over 6 million deaths so far.<sup>[1]</sup> Associated clinical syndromes include pneumonia, systemic inflammatory response and cardiovascular complications with high morbidity and mortality. Progressive deterioration is thought to be related to the kinetics of viral replication culminating in a surge of inflammatory mediator release, “cytokine storm”.<sup>[2]</sup> Around 5-10% of infected patients experience severe or life-threatening symptoms with high mortality.<sup>[3]</sup>

Direct-acting and host-targeting antiviral treatments are the two approaches in treating viral infections. Host targeting antiviral treatments may have an advantage over direct antivirals as they enable the body to fight against a broad spectrum of viruses by simultaneously blocking viral replication and overcoming the potential of viral mutagenesis.<sup>[4]</sup> Anti-inflammatory medications have been shown to improve survival through dampening of the inappropriate immune response in susceptible patients.<sup>[5]</sup> This has led to the search for a drug with such therapeutic properties.

Leflunomide is a drug licenced to treat rheumatoid arthritis (RA).<sup>[6]</sup> It is widely available, cost-effective and can be easily administered both in the hospital and domestic settings. In preclinical models of cell and animal infection by SARS-CoV-2, leflunomide was shown to be a potent inhibitor of human dihydroorotate dehydrogenase (DHODH), an enzyme vital to viral replication in the host cell.<sup>[7,8,9]</sup> It has the potential advantage of not only targeting the virus infection but also suppressing the ensuing inflammatory response which may play a role in more progressive stages of infection leading to serious complications.

The DEFEAT-COVID study (Targeting *de novo* pyrimidine biosynthesis by leflunomide for treatment of corona virus disease 2019) tested whether leflunomide added to standard care was clinically effective and safe for COVID-19 moderate/severe symptoms.

## Methods

*Study design* – This was a multicentre, international, open label, prospective, randomised controlled clinical trial set up at 5 hospitals (two in UK and three in India). The recruitment took place between September 2020 and May 2021, and was approved by all relevant ethics committees.

*Participants* - Patients aged 18 years and above presenting with moderate to critical symptoms of PCR-confirmed COVID-19 disease within 15 days of symptoms onset were recruited. Patients with respiratory compromise and blood oxygen saturation (SpO<sub>2</sub>) <93% on room air detected on pulse oximeter were considered to fulfil the moderate infection criteria. Patients with respiratory failure, septic shock and/or multiple organ dysfunction/failure needing assisted ventilation were considered to be critically ill. Pregnant or breast-feeding women, individuals already receiving specific monoclonal antibody therapy or those with severe immunodeficiency syndrome and hypoalbuminaemia and patients with hypersensitivity to leflunomide or liver

1  
2  
3 enzymes aspartate transaminase (AST) / alanine transaminase (ALT)  $\geq 2$  x upper limits of normal (ULN) were  
4 excluded from the study. All participants gave written informed consent to a member of their clinical care team.  
5  
6

7  
8 *Randomisation* – Consented participants were randomised by a member of the clinical care team to either the  
9 control arm (receiving standard of care treatment [SOC] alone) or the intervention arm (SOC treatment +  
10 leflunomide (SOC+L)) using a stratified block randomisation web-based algorithm. Patient admission data (age  
11  $\leq/\geq 70$ ; co-morbidities; clinical status based on National Early Warning Score 2, NEWS2)<sup>[10]</sup> were used to stratify  
12 patients into 4 risk categories. Group 1: high/moderate comorbidity risk with NEWS2 score  $\geq 5$ ; Group 2:  
13 high/moderate comorbidity risk with NEWS2 score  $< 5$ ; Group 3: low comorbidity risk with NEWS2 score  $\geq 5$ ;  
14 and Group 4: low comorbidity risk with NEWS2 score  $< 5$ .  
15  
16  
17  
18

19  
20 *Interventions* - The definition of the SOC treatment for COVID-19 evolved nationally and internationally through  
21 the course of our study, with progressive evolution in the understanding of disease pathology and emerging  
22 treatment evidence. The SOC during the time of the study across all sites involved four main treatment domains:  
23 steroids, anticoagulation, antibiotics, and antiviral medications. The intervention group (SOC+L) received oral  
24 leflunomide at a loading dose of 100mg/day for three days and then 20mg/day for 7 days as a maintenance dose.  
25 The maintenance dose was reduced to 10mg/day if liver enzymes AST/ALT exceeded 2 x ULN. Leflunomide  
26 treatment was stopped early if AST/ATL exceeded 3 x ULN during the intervention. Study participants received  
27 additional COVID-19 therapies, including monoclonal antibodies, at the discretion of the direct care clinical team,  
28 even if leflunomide was initiated.  
29  
30  
31  
32  
33

34 *Study procedures* - Patient related clinical/investigation data, treatment compliance, outcomes and adverse events  
35 (AE) were collected by the site investigators and recorded on the pre-specified daily electronic case report form  
36 (e-CRF, see Appendix). Adverse events (AE) were graded according to the Common Terminology Criteria for  
37 Adverse Events.<sup>[11]</sup> Blood samples were collected and processed for quantifying viral load (on days 1, 7, 11, 15,  
38 28 or day of discharge) and for future inflammatory profiling (on days 1, 3 and 11). Liver enzymes were measured  
39 at baseline, on day 3 after the leflunomide loading and on discharge. Patient questionnaire was administered at  
40 28- and 90-days after randomisation to monitor the persistence of symptoms possibly associated with long COVID  
41 syndrome.<sup>[12]</sup> SpO<sub>2</sub>/FiO<sub>2</sub> data were monitored daily. The frequency of SpO<sub>2</sub> monitoring varied with FiO<sub>2</sub>  
42 administration. It is standard clinical practice that SpO<sub>2</sub> is monitored every 4 hours in a clinically stable patient.  
43 The frequency increases to continuous SpO<sub>2</sub> monitoring in a patient with oxygen requirement or ventilation  
44 support. Where multiple daily values were recorded we selected the SpO<sub>2</sub>/FiO<sub>2</sub> ratio reflecting increased oxygen  
45 demand.  
46  
47  
48  
49  
50  
51

52 *Blinding* - Site investigator teams and direct clinical care teams were not blinded to the randomisation outcomes,  
53 but neither were provided information about the aggregate patient outcomes.  
54  
55  
56  
57  
58  
59  
60

1  
2  
3 *Outcomes* - The primary outcome is the time (days) from randomisation to clinical improvement (TTCI) of two  
4 points on a seven-category clinical status scale or live discharge from hospital prior to 28 days.<sup>[13]</sup> The clinical  
5 status ordinal scale consisted of the following: 1 not hospitalised, resumption of normal activities; 2 not  
6 hospitalised, but unable to resume normal activities; 3 hospitalised, not requiring supplemental oxygen; 4  
7 hospitalised, requiring supplemental oxygen; 5 hospitalised, requiring nasal high-flow oxygen (HFNC) therapy,  
8 non-invasive mechanical ventilation (NIV), or both; 6 hospitalised, requiring extracorporeal membrane  
9 oxygenation (ECMO), invasive mechanical ventilation (IMV), or both; and 7 death.

10  
11  
12  
13  
14  
15 Safety profile of leflunomide in this group of patients was assessed from incidence rates of AE deemed to be  
16 serious and/or severe ( $\geq$ Grade 3). Grading guidelines suggest 5 categories: 1 mild, asymptomatic or mild  
17 symptoms, clinical or diagnostic observations only, intervention not indicated; 2 moderate, minimal, local or non-  
18 invasive intervention indicated, limiting age-appropriate instrumental activities of daily livings (ADL); 3 severe,  
19 medically significant but not immediately life-threatening, hospitalization or prolongation of hospitalization  
20 indicated, disabling; limiting self-care ADL; 4 life-threatening consequences, urgent intervention indicate; 5 death  
21 related to AE. In addition, the incidences, and levels of liver transaminitis (ALT, AST) were assessed.

22  
23  
24  
25  
26 The main secondary outcomes were focused on overall (all-cause) mortality, and oxygen dependence (duration in  
27 days) assessed by S/F ratio (i.e. oxygen saturation detected by pulse oximeter [SPO<sub>2</sub>] / supplemental oxygen  
28 concentration [FiO<sub>2</sub>]) and impact on viral replication (viral load). Additional secondary outcomes included  
29 inflammatory targets such as CRP, lymphocyte counts, and selected cytokines (initially focussing on IL2, IL6,  
30 TNF- $\alpha$ ). The concept of long COVID emerged during the study, so we used the data from our questionnaires at  
31 28 and 90 days to comment on long COVID symptoms

### 32 **Statistical analyses**

33 *Sample size calculation* - The primary outcome measure was a time-to-event analysis based on an assessment of  
34 TTCI. Since our study protocol was conceived and developed during the initial peak of the global pandemic, the  
35 precise hazard ratio for major clinical outcomes related to this infection was largely unknown and, therefore,  
36 sample size calculation was based on the proportion of patients expected to meet the outcome criteria by 28 days.<sup>[14]</sup>  
37 Assuming  $\alpha = 0.05$ ,  $\beta = 0.20$  and allocation ratio = 1:1, the number of patients per treatment arm was estimated  
38 to be 74. We expected a 20% attrition rate, so the total number of patients required in the study was calculated to  
39 be 178, 89 patients in each arm.

40  
41  
42  
43  
44  
45  
46  
47 *Analysis population* - The full analysis set was defined according to the intention to treat principle (ITT). All  
48 subjects randomised were included in the ITT analysis set for the primary outcome, regardless of whether they  
49 received any dose of their allocated treatment. This analysis set was used to summarize baseline patient  
50 characteristics and to carry out all efficacy and safety assessments. Subjects were analysed according to their  
51 randomised treatment allocation. We also present a modified intention to treat analysis for the primary and  
52 secondary outcomes, as a sensitivity analysis, to account for study participants who were randomised in error and  
53 those who withdrew consent prior to the intervention.

54  
55  
56  
57  
58 *Primary outcomes* - The TTCI data was estimated using Kaplan-Meier survival curves. Hazard ratio and 95%  
59 confidence intervals were estimated using Cox proportional hazards regression models. The primary analysis was  
60

1  
2  
3 stratified by the randomisation strata: baseline risk indicators (age  $\leq$ / $\geq$  70 years, co-morbidities) and NEWS2 score.  
4 Log rank test was used for comparing the Kaplan-Meier curves, hazard ratios and their confidence intervals for the  
5 significance of the treatment effect.  
6

7  
8 *Secondary outcomes* - Continuous secondary outcomes were evaluated for within-groups differences using the  
9 Mann-Whitney U or Wilcoxon rank tests, respectively, depending on the data distribution identified: parametric  
10 or non-parametric. Statistical normality was assessed using the Shapiro-Wilk method. Categorical outcomes were  
11 assessed for between-group differences using the chi-square method and expressed as %. For all outcomes,  
12 statistical significance was accepted at a 2-sided  $\alpha$  of 0.05.  
13

14  
15 *Adverse events* - AEs were coded using MedDRA and assigned grades based on National Cancer Institute  
16 Common Terminology Criteria for Adverse Events Version 4.03.<sup>[11]</sup>  
17

### 18 19 20 **Public and patient involvement**

21 Patient volunteers were consulted regarding the study design and materials to be provided to the potential  
22 participants (patient information sheet, consent forms, questionnaires). Two lay members were appointed to the  
23 Trial Steering Committee and provided input on the conduct of the study.  
24  
25  
26  
27  
28  
29  
30  
31  
32  
33  
34  
35  
36  
37  
38  
39  
40  
41  
42  
43  
44  
45  
46  
47  
48  
49  
50  
51  
52  
53  
54  
55  
56  
57  
58  
59  
60

## Results

### Recruitment, Randomisation, Assignment of Therapy and Follow-up

Between September 2020 and May 2021, 214 patients were recruited to the study from 2 UK Hospitals (n=66, 31%; Ashford and St Peters' NHS Trust, Surrey; Kingston Hospital NHS Trust, London) and 3 Hospitals in India; (n=148, 69%; Max Hospital, Delhi; Meditrina Institute, Nagpur; Noble Hospital, Pune). Due to the wavering new COVID-19 infections, the UK recruitment came to a halt in February 2021 and patients at the three Indian sites were recruited in the remaining period. Of the 214 participating patients, 104 were randomised to the intervention (SOC+L) group and 110 to the control (SOC) group. In the SOC+L group, 3 patients withdrew study consent after randomisation, and did not receive leflunomide therapy. During the data cleaning process, 10 patients were flagged as not meeting the inclusion criteria (6 in SOC+L; 4 in SOC), as they did not have moderate COVID-19 symptoms at the time of randomisation. Daily clinical data were collected for all patients during hospitalisation and the patients were asked to complete follow-up questionnaires at 28- and 90-days after randomisation, as shown in Figure 1 (CONSORT diagram).

Baseline patient characteristics were similar between the SOC+L and SOC groups, summarised in Table 1.

| Characteristics                                         | SOC+L<br>n=104  | SOC<br>n=110    |
|---------------------------------------------------------|-----------------|-----------------|
| Age, yrs, mean $\pm$ sd                                 | 55.2 $\pm$ 14.7 | 56.4 $\pm$ 15.2 |
| BMI, kg/m <sup>2</sup> , mean $\pm$ sd                  | 27.3 $\pm$ 5.1  | 27.7 $\pm$ 5.6  |
| Female gender at birth, %                               | 28.8            | 37.3            |
| <b>Ethnicity, %</b>                                     |                 |                 |
| South Asian                                             | 75              | 69              |
| White                                                   | 24              | 30              |
| Arab                                                    | -               | 0.91            |
| <b>Comorbidities, %</b>                                 |                 |                 |
| BMI $\geq$ 40 kg/m <sup>2</sup>                         | 2.9             | 4.6             |
| Age $\geq$ 70 yrs                                       | 18.3            | 20              |
| Chronic respiratory disease                             | 8.7             | 15.5            |
| Chronic cardiovascular disease (including hypertension) | 38.5            | 39.1            |
| Chronic renal disease                                   | 2.9             | 2.7             |
| Diabetes                                                | 23.1            | 20.9            |
| Immunosuppressive diseases                              | 6.7             | 6.4             |
| <i>Others</i>                                           |                 |                 |
| Malignant neoplasm                                      | 3.9             | 2.7             |
| Chronic haematological disease                          | 1               | 0.9             |
| Chronic neurological disorder                           | 10.6            | 3.7             |
| Malnutrition                                            | 1               | 0.9             |
| Smoking (present or past)                               | 21.1            | 20              |
| <b>Symptom duration, day, median (IQR)</b>              | 6 (4-8)         | 6 (5-8)         |
| <b>Time from admission, day, median (IQR)</b>           | 2 (1-4)         | 2 (1-3)         |
| <b>Non-invasive ventilation, %</b>                      | 4.8             | 7.3             |
| <b>Invasive ventilation, %</b>                          | 1               | 1.8             |
| <b>NEWS 2 score median (IQR)</b>                        | 6 (4-8)         | 5 (4-8)         |
| <b>CRP, mg/L, median (IQR)</b>                          | 28 (9-77)       | 32 (13-64)      |
| <b>Transaminase, &gt;ULN, %</b>                         |                 |                 |
| ALT                                                     | 44.7            | 31.7            |
| AST                                                     | 35.4            | 28.4            |
| <b>Stratification, %</b>                                |                 |                 |
| Group 1                                                 | 12.5            | 14.5            |
| Group 2                                                 | 14.4            | 16.4            |
| Group 3                                                 | 48.1            | 46.4            |
| Group 4                                                 | 25              | 22.7            |

**Table 1: Baseline patient characteristics at the time of randomization**

BMI: Body mass index; ULN = upper limits of normal; Group 1: High/Moderate comorbidity risk with NEWS2 score  $\geq$ 5; Group 2: High/Moderate comorbidity risk with NEWS2 score  $<$ 5; Group 3: Low comorbidity risk with NEWS2 score  $\geq$ 5; and Group 4: Low comorbidity risk with NEWS2 score  $<$ 5. Creatinine ULN: 104 $\mu$ mol/L; ALT ULN: 49 U/L; AST ULN: 48 U/L; Immunosuppressive disease: asplenia, rheumatological disorder.

1  
2  
3 Baseline characteristics were similar in both arms but there were significantly more patients with chronic  
4 neurological disorders in the SOC+L group. None of the patients with this condition had contraindication to  
5 non-invasive ventilation.  
6  
7

## 8 Treatment Assignment and Compliance

9 Full course of leflunomide therapy was completed by 81/104 patients (78%). Of the 19 patients (16 in UK, 3 in  
10 India) who did not complete treatment, 3 patients did not receive a single dose of leflunomide as they withdrew  
11 consent soon after randomization, 5 patients died prior to completion of the full course, 8 patients stopped  
12 leflunomide early when ALT/AST exceeded 3 x ULN laboratory reference range, 1 patient had tocilizumab  
13 introduced to replace leflunomide, 1 patient self-discharged early and 1 refused final two doses. Leflunomide  
14 treatment compliance appeared to be better in participants from Indian centres as 92% of them received the full  
15 dose of leflunomide compared to 52% of patients in the UK centres which was largely due to a higher incidence  
16 of liver enzyme transaminitis and mortality observed in the UK cohort.  
17

18 There was no significant difference in the assignment of standard of care treatment between the SOC+L and  
19 SOC groups as shown in Figure 1. It included corticosteroids, anticoagulants, antibiotics, and antiviral therapies.  
20 Overall, steroid uptake was >95% in both treatment arms with different protocols used at participating study  
21 centres: dexamethasone 4 mg/day for 3 days; dexamethasone 6 mg/day for 7-10 days; methylprednisolone 80  
22 mg/day for 7 days and methylprednisolone 120 mg/day for 5 days. However, there was no difference in the  
23 steroid treatment assigned between the control and the treatment groups. There were some differences in the  
24 proportions of patients receiving additional adjunct therapies such as hydroxychloroquine and immunotherapy  
25 (Supplementary table 1). Overall, hydroxychloroquine was prescribed to similar proportion of patients in the  
26 intervention and the control group (47%) but the proportions of patients receiving it in the UK was much  
27 smaller, 3% compared to 67% in India. A small number of patients received immunomodulating drugs such as  
28 interferon alpha and beta (n = 20 in India), tocilizumab and bevacizumab (n = 5 in the UK, n = 2 in India).  
29  
30  
31  
32  
33  
34  
35  
36  
37  
38

## 39 Primary Outcomes

40 *Time to clinical improvement of 2 points on a clinical status scale/discharge before 28 days*

41 In the ITT analyses (n = 214), SOC+L group did not have a significantly shorter TICI than the SOC group  
42 within 28 days of randomisation; the median was 7.0 (IQR 7.0 - 8.0) days vs. 8.0 (IQR 7.0 - 9.0) days,  
43 respectively; with a hazard ratio (HR) of 1.32 (CI 0.98 -1.77), p = 0.070 (Figure 2).  
44

45 In modified ITT population (n = 201) where 3 patients who withdrew consent after being randomised to the  
46 SOC+L group but never received leflunomide treatment and 10 patients who did not fulfil moderate COVID-19  
47 symptoms at randomisation were excluded from analysis, the median TICI was significantly shorter in the  
48 SOC+L group than SOC group by 1.0 day, median 7.0 days (IQR 7.0 -8.0) vs. 8.0 (IQR 7.0 – 9.0), respectively,  
49 with a HR of 1.42 ( CI 1.04 – 1.94); p = 0.028.  
50  
51  
52  
53

## 54 Safety

55 Incidences of AE of all grades are summarized in Table 2.  
56  
57  
58  
59  
60



| Adverse events                                      | SOC+L<br>(n= 104) | SOC<br>(n=110) |
|-----------------------------------------------------|-------------------|----------------|
|                                                     |                   |                |
| <b>Adverse events (n) / Patients (n)</b>            | 121 / 56          | 91/ 42         |
| Grade 1 (Mild)                                      | 58 / 39           | 48 / 32        |
| Grade 2 (Moderate)                                  | 23 / 13           | 17/9           |
| Grade 3 (Severe)/ Grade 4 (Life threatening events) | 31/15             | 16/9           |
| Grade 5 (Deaths)                                    | 9/9               | 10/10          |

**Table 2: Incidence of reported adverse events in both treatment arms.**

The table shows the number of adverse events recorded in the study and the number of patients affected by at least one adverse event.

At least one AE was reported in 98/214 participants, and most of them were mild in severity. AEs of moderate grade were reported in 13/104 patients in SOC+L group and 9/110 patients in SOC group. Serious AEs (n=47) were reported in 15/104 patients in SOC+L groups and 9/110 in SOC group and 19 patients died (9 in SOC+L group, 10 in the SOC group). There was no significant difference in the incidence of AE reported between the two groups. No Serious AEs were attributed to leflunomide. A supplementary Table 2 lists all adverse events recorded in the study according to MedDRA terms.

### *Liver function*

At baseline, more patients with greater than ULN levels of ALT and AST were randomized in the SOC+L group than the SOC group (ALT: 46 vs 33,  $p = 0.049$ ; AST: 31 vs 24,  $p = 0.340$ ). By Day 3/4, following the initial loading of leflunomide therapy in the SOC+L group, there was a significantly higher number of patients with greater than ULN level of ALT and AST in the SOC+L than the SOC group (64 vs 38,  $p < 0.001$ ; and 51 vs 24,  $p < 0.001$ ). By discharge, the difference in the number of patients with ALT and AST transaminitis between the SOC+L and SOC groups was no longer significant (28 vs 27,  $p = 0.633$ ; and 20 vs 17,  $p = 0.318$ ) (Supplementary table 3). Leflunomide therapy was terminated early if transaminase levels exceeded 3 x ULN. However, there were 5 patients in India who continued with leflunomide therapy at the discretion of the researcher and direct care team with close monitoring of their liver function. Interestingly, in this subset of patients, the transaminase levels improved despite continuation of therapy. There were no adverse events related to clinically significant liver injury due to leflunomide. AEs related to liver dysfunction were reported in 16/104 (15.4%) patients in SOC+L group, 7 were mild, 8 were moderate and 1 was severe. Of these, 10 were deemed possibly treatment related and leflunomide treatment was discontinued in 9 patients. Comparatively, in the control group, 6/110 (5.5%) patients had liver dysfunction related AE. Five of them were mild and 1 case was severe.

### **Secondary Outcomes**

A modified intent to treat approach was used for data from 201 patients for all secondary outcomes. This included 95 patients in the SOC+L group and 106 patients in SOC group. For these analyses we excluded 3 patients in the SOC+L group who withdrew consent and never received leflunomide and 10 patients (6 SOC+L; 4 SOC) who

1  
2  
3 did not fulfil moderate COVID symptoms inclusion criterion (did not show respiratory compromise and blood  
4 oxygen saturation (SpO<sub>2</sub>) <93% on room air).  
5  
6  
7

### 8 *Mortality*

9  
10 There was no difference in all-cause mortality within 28 days of randomization between the treatment arms as  
11 9/95 (9.47%) of patients died in SOC+L group compared to 10/106 (9.43%) in SOC groups. The survival curves  
12 diverge in favour of the SOC+L group after 10 days of hospital treatment, but the curves converged again after 3  
13 weeks (when majority of the patients have been discharged). All deaths were attributed to complications related  
14 to Covid-19 (Figure 3, panel A)  
15  
16  
17

### 18 *Oxygenation and assisted ventilation*

19  
20 Oxygen independence is defined by maintenance of SpO<sub>2</sub>/FiO<sub>2</sub> Air ratio > 4.43. There was a difference in the  
21 median time the participants required to be completely weaned off oxygen therapy between groups; 6.0 (IQR  
22 4.0 – 8.0) days in the SOC + L group vs. 7.0 (5.0 – 10.0) days in the SOC group, p = 0.047 (Figure 3, panel B)  
23  
24  
25

26  
27 Non-invasive ventilation was required for 14.4% of patients in SOC+L group vs. 16.4% in the SOC group. The  
28 duration of non-invasive ventilation was 6.0 (IQR 2.0-9.0) days in the SOC+L group compared to 4.5 days (IQR  
29 2.3-6.8) in the SOC group. Similar proportion of patients required non-invasive ventilation at the time of study  
30 enrolment (4.8% in SOC+L group vs. 7.3% in SOC group, p= 0.45).  
31

32  
33 The proportion of patients admitted to level-2 Intensive Care Unit (ICU) was 8.7 % in the SOC+L group and  
34 8.2% in the SOC group. The median time spent at ICU was 8.0 (IQR 5.0-10.0) days vs. 9.0 (IQR 5.0-13.0) days,  
35 respectively. Invasive ventilation was required for 3.9% of patients in the SOC+L group and 5.5% in the SOC  
36 group with median duration of 6 (IQR 4.8, 6.0) days vs. 7.0 (IQR 5.3 - 11.8) days, respectively. None of the  
37 between group comparisons were statistically significant. Patients recruited in India were significantly less  
38 likely to require invasive or non-invasive ventilation or be admitted to ICU compared to patients recruited in the  
39 UK (p<0.001).  
40  
41  
42  
43

### 44 *Viral load*

45  
46 Quantitative SARS-COV-2 PCR measurements from nasopharyngeal swabs at baseline showed no difference in  
47 median log<sup>10</sup> viral loads (copies/ml) between the two groups, SOC+L 4.68 (IQR 4.45-4.85) vs SOC 4.76 (IQR  
48 4.48-4.92), p =0.27.. We clustered the serial samples to reflect the crucial time intervals during the hospital stay:  
49 time coinciding with finishing leflunomide loading dose (by Day 4), time to 75% patients being discharged from  
50 hospital (by Day 7), time to finishing leflunomide maintenance dose (by Day 11) and beyond (Figure 4). Viral  
51 loads were significantly reduced in both treatment arms. There was no significant difference in the overall rate  
52 of the viral load clearance between the two groups by Day 11 and beyond. Viral loads were significantly  
53 reduced in both treatment arms by Day 7, p<0.001; and by Day 11, p <0.030. The rate of viral load reduction  
54 between groups by Day 11 appeared to be similar.  
55  
56  
57  
58  
59  
60

### *Cytokines, CRP and lymphocytes*

Cytokine levels were assessed separately for UK and Indian sites as two laboratories using different assays processed the samples. The median baseline levels of IL 2, IL 6 and TNF- $\alpha$  levels (UK: IL2 0.43 [IQR 0.30-0.62] pg/ml; IL6 6.2 [IQR 2.9-9.7] pg/ml; TNF- $\alpha$  10.1 [IQR 7.8 -13.5] pg/ml; India: IL2 4.3 [IQR 2.8-5.8] pg/ml; IL6 12.6 [IQR 6.5-43.1] pg/ml; TNF- $\alpha$  6.1 [IQR 4.9-7.1] pg/ml) were not significantly raised from normal reference ranges and were not different between treatment groups in both countries. The cytokine levels were reduced during hospitalisation, though the clinical significance of these changes within the normal range is uncertain. There was no significant difference in the trends observed between treatment arms.

The median baseline levels of CRP were similar in both groups, 28, (IQR 8-71) in SOC+L vs. 34 (14-71) mg/L in SOC. By one week of treatment, there was similar levels of reduction between groups.

The median baseline lymphocytes levels were lower than normal reference range in both groups (0.99 [IQR 0.6-1.6]  $\times 10^9/L$  in SOC+L vs 0.95 (IQR 0.6-1.6)  $\times 10^9/L$  in SOC. By 1 week of treatment, levels rose to normal range in both groups. There was no significant difference in the trends observed between groups.

### *28- and 90-days follow up*

At 28 days, 59/81 patients (71.2%) in the SOC+L group and 60/91 patients (65.9%) in the SOC group experienced at least 1 of 9 common long-COVID symptoms (fatigue, cough, anxiety, chest pain, brain fog, breathlessness, disturbed sleep, palpitations, joint pain); with sleep quality (48.2% vs. 38.5%), breathlessness (40.7 vs 42.9%), joint pain (32.1 vs. 33%), fatigue (29.6 vs, 31.9%), and anxiety (24.7 vs. 19.8%) being the commonest symptoms experienced (Supplementary table 4). At 90 days, there was a reduction in overall prevalence of symptoms as 42/81 patients (51.2%) in the SOC+L group and 37/91 (40.7%) patients in the SOC group and any of the residual symptoms were of reduced severity. There was no significant difference in these outcomes between the treatment arms.

Myalgia symptoms were comparably reduced between the 2 groups at 90 days. Anosmia and loss of taste were still reported by 2 and 7 patients, respectively, in the SOC+L group, but none in the SOC group.

At 28 days, 41.5% patients in the SOC + L group and 52.8% in SOC group, reported being moderately to severely dyspnoeic (Grade 4: stops for breath after walking 100m; Grade 5: too breathless to leave the house or breathless when dressing). These proportions were further reduced at 90 days, to 22% in the SOC+L group compared to 19.8% in SOC group. These differences were not significant in between group comparisons.

Mental health issues were highlighted by reports of feeling depressed and losing interest in doing things. Comparable proportions of patients in the SOC+L group and SOC group reported those problems at 28 days (17.9% vs 16.0%; 11.6% vs 14.2%, respectively) which were further reduced in both groups at 90 days (11.6% vs 9.4%; 9.5% vs 6.6%, respectively).

1  
2  
3 At 28 days participants in the SOC+L group scored their current health as being  $80\pm 25\%$  of the usual which  
4 increased to  $89\pm 17\%$  at 90 days. In the SOC group the scores were similar,  $82\pm 23\%$  and  $90\pm 17\%$  at 28 and  
5 90 days respectively.  
6  
7  
8  
9

## 11 Discussion

12  
13  
14 This study is the first prospective, multicentre, randomised, controlled clinical trial investigating the clinical  
15 efficacy and safety of leflunomide in treating acute COVID-19 infection. The study showed that a course of  
16 leflunomide (3 days of 100 mg/day loading dose followed by 7 days of 20 mg/day maintenance dose) added to  
17 the standard care treatment (steroids, anticoagulants, antibiotics and antiviral therapy), did not influence the  
18 primary outcome of the trial and the acute clinical outcomes at 28 days, or the prevalence of long-COVID  
19 symptoms at 28 and 90 days. However, participants who received leflunomide as an adjunct therapy were  
20 weaned off oxygen earlier, which translated to reduced hospital stay by one day. The medication appeared to be  
21 safe and well tolerated with no severe adverse events attributable to it. A small proportion of patients in our  
22 study were still burdened by COVID-19 related symptoms 90 days after randomisation.  
23  
24  
25  
26  
27

28 This multicentre trial advances the evidence base on the impact of leflunomide, a repurposed rheumatoid  
29 arthritis medication, on COVID-19 infection. Leflunomide was a potentially attractive therapeutic choice from  
30 early preclinical and clinical experience reported from hospitals in Wuhan, China. Dihydroorotate  
31 dihydrogenase (DHODH), located in the inner mitochondrial membrane is a rate-limiting enzyme in de novo  
32 pyrimidine biosynthesis. In virus-infected cells, a large intracellular nucleotide pool is consumed by rapid viral  
33 replication. RNA viruses need unique UMP but not TMP in their genomes. As UMP is the particular nucleoside  
34 produced by DHODH, RNA viruses are sensitive to reduced DHODH activity. Preclinical models of cell and  
35 animal infection by SARS-CoV-2 demonstrated that leflunomide attenuates viral genome replication, suppresses  
36 inflammatory response and the release of pro-inflammatory cytokines and chemokines.<sup>[7,8,9]</sup> Early reports from  
37 China advocated major clinical benefits in patients treated with leflunomide both in terms of less severe  
38 outcomes and duration of infection.<sup>[15,16,17]</sup> While the current study did not reproduce these overall benefits in  
39 the ITT analysis regarding the primary outcome, it confirmed some positive effects in those patients who  
40 received the trial intervention (in modified intent to treat analysis).  
41  
42  
43  
44  
45  
46  
47

48 Our results are likely explained by the changing landscape and evolution of the routine COVID-19 treatment  
49 protocols in the standard arm of the study and the resultant severity of the COVID-19 outcomes in general. The  
50 initial phase of the COVID-19 pandemic was characterised by severe respiratory and systemic infections and poor  
51 outcomes due to the development of acute respiratory distress syndrome, multi-organ failure and eventual  
52 death.<sup>[18,19]</sup> Contrary to this early experience with COVID-19 management, the in-hospital mortality in the present  
53 study was much lower, less than 10% in both groups. The majority of patients in both treatment arms improved  
54 during hospitalisation and were discharged within a week of admission. Inclusion of prognostically significant  
55 COVID-19 therapies in both pharmacological and non-pharmacological standard of care treatments undoubtedly  
56 contributed to a reduction in severe complications and better overall outcomes. During patient recruitment of the  
57  
58  
59  
60

1  
2  
3 current trial, various therapies have been introduced including more than 95% percent of the study population  
4 received steroids as standard of care.  
5

6  
7 Theoretical considerations suggest that leflunomide may effectively inhibit viral replication. The initial pilot  
8 study during the early outbreak of COVID-19 in Wuhan, China reported reduced viral shedding time following  
9 leflunomide treatment during acute infection compared to the standard of care therapy.<sup>[15]</sup> Similarly, viral shedding  
10 duration was reduced in leflunomide treated patients who remained qPCR positive 1 month after the initial  
11 infection.<sup>[16]</sup> Our study addressed the viral load reduction at pre-specified time points. Values of viral load were  
12 reduced over time but there was no difference between the treatment arms. Both methodological considerations  
13 and the inclusion of comprehensive pharmacological treatment regimens in the SOC could explain these  
14 differences. For instance, corticosteroid therapy was absent in the early study from Wuhan, but the later study  
15 refers to the use of hydroxychloroquine, interferon-alpha and antiviral medications as part of acute standard of  
16 care therapy.<sup>[15,16]</sup> However, our results are in line with other reports from China which showed that duration of  
17 viral shedding was not affected by leflunomide added to nebulised interferon alpha therapy for treating long-term  
18 positive COVID-19 after 4 weeks of in-hospital treatment.<sup>[17]</sup> Interestingly a third of these patients received  
19 corticosteroid therapy during the initial acute treatment.<sup>[16,17]</sup>  
20  
21  
22  
23  
24  
25

26  
27 Beyond the issue of therapeutic efficacy and viral load, our study confirms overall safety of leflunomide in  
28 COVID-19 infection. The safety profile of leflunomide is well established in the treatment of RA.<sup>[6]</sup> Leflunomide,  
29 repurposed for the COVID-19 treatment, was well tolerated since no serious adverse events were attributed to it.  
30 Similar findings were reported in other studies.<sup>[15,16,20]</sup> Mild transaminitis following long-term leflunomide use in  
31 the RA population is recognised, and usually resolves after medication is terminated. The mechanism is likely to  
32 be modulation of interleukins which may hinder the protection of hepatocytes from injury rather than direct  
33 toxicity.<sup>[21]</sup> There were comparable incidences of transaminitis in both treatment arms in our study. However,  
34 more patients in the UK cohort had raised liver function tests leading to modification or termination of leflunomide  
35 treatment. This may be accounted for by the difference in the severity of COVID-19 disease and spectrum of co-  
36 morbidities between UK and Indian participants rather than genetic polymorphism in drug metabolism. Overall,  
37 the proposed leflunomide regimen was well tolerated.  
38  
39  
40  
41  
42  
43  
44

45 One of the motivations of the current trial employing leflunomide was to benefit from the anti-inflammatory  
46 effects of this drug. In this context, hydrocortisone has been demonstrated as an effective therapy in severe  
47 COVID-19 infections and recent trials also demonstrated the benefit of tocilizumab, a selective IL-6 inhibitor and  
48 a different disease modifying rheumatoid arthritis medication. However, such finding is not universal as the  
49 benefit of tocilizumab is mainly demonstrated in critically to moderately ill patients.<sup>[22,23]</sup> A recent meta-analysis  
50 showed that the benefit of IL-6 receptor antagonist was encountered only in patients who were also treated with  
51 glucocorticoids.<sup>[24]</sup> This is in keeping with observations that a broader spectrum of pro-inflammatory cytokines,  
52 macrophages and T cell response have all been documented in severely ill patients demonstrating the role of a  
53 more complex inflammatory response. It is exactly this broader inflammatory reaction that could be targeted by  
54 leflunomide as its effect on cytokines is not restricted to IL 6 and it may also have an impact on activated T cell  
55 response.<sup>[8,9,25]</sup> Such phenomena might contribute to the benefits of reduced oxygen dependence in patients who  
56  
57  
58  
59  
60

1  
2  
3 have received leflunomide treatment. However, it is conceivable that the full benefit of such anti-inflammatory  
4 effect may be more pronounced in severely ill patients, but this population was underrepresented in our trial and  
5 the (inadvertent) inclusion of patients with milder symptoms may have led to some attrition of statistical power  
6 in our study. A more detailed analysis of the cytokine and metabolic profiles of our trial population is underway  
7 to clarify these important issues.  
8

9  
10 Another important consideration when discussing the potential benefits of leflunomide is the mutation ability of  
11 the SARS-CoV-2 virus.<sup>[26]</sup> So far, the mutations observed in different strains worldwide have largely been  
12 confined to the part of the spike protein affecting the virus's ability of cell entry as opposed to a region targeted  
13 by neutralising antibodies. However, the possibility of mutations in different regions cannot be excluded.  
14 Targeting the host's pyrimidine biosynthesis pathway by leflunomide, rather than using drugs with direct antiviral  
15 action, remains an advantage offering protection against a broader spectrum of viruses and potentially overcoming  
16 resistance. Indeed, DHODH inhibitors such as leflunomide has shown broad-spectrum antiviral effects against  
17 various RNA viruses in cell models.<sup>[7]</sup> Leflunomide may therefore be considered a viable pharmacological  
18 treatment for COVID-19 patients given it is well tolerated, safe, economical, and widely available. Its clinical  
19 effectiveness measured against recognised selective IL-6 inhibitors in the more severely/critically ill patients  
20 needs to be further explored as leflunomide may be the preferred option in countries where other  
21 immunomodulating agents, such as Talizumab, may not be practical or widely available.  
22  
23  
24  
25  
26  
27  
28  
29

### 30 **Limitations**

31  
32  
33 The present study has several limitations. In order to balance the needs of the trial with clinical care and to  
34 minimise disruption to already overstretched clinical resources during COVID-19 pandemic, we chose to adopt  
35 an open label study design. This design may have affected the data collection and clinical management of the  
36 patients and potentially introduced a bias. However, it also allowed early detection of significant adverse events  
37 and a potential outcome benefit. This was an important consideration when testing an off-label use of a medication  
38 in COVID-19, a disease with high morbidity and mortality.  
39

40  
41 The study was set out to recruit more severely and critically affected patients in a single country. However, due  
42 to recruitment restrictions because of national prioritization of critically ill patients to only a few studies  
43 together with scarcity of NHS resources during the pandemic, the study was extended abroad, ultimately  
44 recruiting less affected patients with heterogeneous clinical profiles. Although patient characteristics and  
45 medications received as part of SOC did not differ between the randomised arms, the more heterogeneous  
46 population, milder COVID-19 disease, and more effective standard of care treatments most likely impacted on  
47 the hypothesised effect size and the ability of finding a difference in our recruited sample. Finally, the COVID-  
48 19 restrictions affected our protocolised laboratory investigations, such as the serial viral load and  
49 comprehensive inflammatory profiling. Nevertheless, studies focusing on the more severely affected participants  
50 are underway and will be the subject of a separate submission.  
51

52  
53 Secondary outcomes assessing organ and multi-organ endpoints set out in the original protocol were not  
54 reported because the data are incomplete for meaningful analyses. **Conclusion**

55  
56 Leflunomide had no major impact on the clinical outcomes when administered together with the currently  
57 established but evolving therapies in moderately affected COVID-19 patients. It may shorten duration of oxygen  
58  
59  
60



1  
2  
3 dependence thereby affecting the TICI and hospital discharge. Transaminitis associated with leflunomide therapy  
4 did not lead to excess adverse events compared to the control group and may have arisen in part due to the severity  
5 of clinical infection. Further studies are needed to investigate the potential benefits of leflunomide in the critically  
6 ill patients and the biological mechanisms involved.  
7  
8  
9

### 10 **Ethics statements**

11  
12 All patients taking part in the study signed written informed consent form once the study was ethically approved  
13 by relevant bodies in England (South Central - Berkshire Research Ethics Committee, Bristol REC Centre,  
14 reference number 20/SC/0264) and India (Max HealthCare Ethics Committee, reference number  
15 RS/MSSSH/GMHRCCMS/MHEC/CCM/20-23; Meditrina Institute Ethics Committee, reference number  
16 ECR/605/Inst/MH/2014/RR; Noble Hospital Institutional Ethics Committee, reference number  
17 NHIEC/FEB/2021/238).  
18  
19  
20  
21

### 22 **Data availability statement**

23  
24 The anonymized data may be available upon request following approval from the Trial Management Group and the  
25 Sponsor.  
26

### 27 **Acknowledgments**

28 We are grateful to all the patients who took part in the study and contributed their data to our research. We also  
29 thank their clinical care teams who helped with data collection. We are grateful for the support from medical  
30 research charity LifeArc as part of its initiatives to address the need for new therapies against COVID-19 against  
31 the backdrop of world pandemic.  
32

33 We would like to acknowledge the vital roles of the following:

34 **Data Monitoring Committee:** David Morgan (Chair), Lajos Szentgyorgyi, Yee Cheah  
35

36  
37 **Trial Steering Committee:** Brendan Madden (Chair), Patrick Yong, Sreenivasa Rao Kondapally Seshasai, Matt  
38 Mendes, Janice Rodrigues-Mendes, Rod Hughes, Sharanpal Jeetle, Subash Somalanka  
39

40 **Clinical Research Organisation:** Innovate Research CRO in India helped with site and patient recruitment,  
41 project management, monitoring & data collation: Devesh Kumar (Director), Piyush Kumar Pandey (Head  
42 Clinical Operations), Shaitan Singh (Assistant Project Manager), Charanpreet Arora (Clinical research  
43 associate)  
44

### 45 **DEFEAT COVID Investigators:**

46 Ashford and St Peter's Hospital NHS Foundation Trust, Ashford, UK: Shashank Sharma, Megan McGee,  
47 Kieran Brack, Maia Aquino, Rita Pereira, Vicky Frost, Kirsty, Gibson, Maria Croft, Fatima Omar, Kapila  
48 Ranasinghe,  
49

50 Kingston Hospital NHS Foundation Trust, Kingston upon Thames, UK: Siva Mahendran, Anna Joseph, Maggie  
51 Grout  
52

53 Max Hospital, New Delhi India: Arun Dewan, Ritesh Aggarwal  
54

55 Meditrina Institute, Nagpur, India: Ajay Bulle  
56

57 Noble Hospital, Pune, India: Aparna Kodre  
58  
59  
60

**Authors' contributions**

All designated authors meet all four ICMJE criteria for authorship. The funders and the sponsor of the study had no role in the analyses or the interpretation of the results.

ZC, NM, HLL, SRKS, LL, JB, SL, IJ, DF and PS made substantial contribution to the conception and design of the study. SS, AK, AB, RA, KB, MM, KR, FO, KL, AW, AL, SRKS, JB, HLL, NM, IKH and ZC made substantial contribution to the acquisition, analysis and interpretation of the data for the study. All authors contributed to the drafting, revision and final approval of the manuscript. ZC, NM and LL are responsible for the overall content.

**Competing interests**

All authors have completed the ICMJE uniform disclosure form at [www.icmje.org/disclosure-of-interest/](http://www.icmje.org/disclosure-of-interest/) and declare no competing interests.

**Dissemination**

A summary of the results will be disseminated to the participants by principal investigators at each trial site via a newsletter.

**Licencing Statement**

The Submitting Author has the right to grant and does grant on behalf of all authors of the Work (as defined in the author licence), an exclusive licence and/or a non-exclusive licence for contributions from authors who are: i) UK Crown employees; ii) where BMJ has agreed a CC-BY licence shall apply, and/or iii) in accordance with the terms applicable for US Federal Government officers or employees acting as part of their official duties; on a worldwide, perpetual, irrevocable, royalty-free basis to BMJ Publishing Group Ltd ("BMJ") its licensees.

**Funding**

This work was supported by LifeArc, a UK registered charity number 1015243 (Grant number not applicable).



## References

1. <https://COVID19.who.int/>
2. Chen YL, Quach TTT, COVID-19 cytokine storm syndrome: a threshold concept. *Lancet Microbe*. 2021 Feb;2(2):e49-e50.doi: 10.1016/S2666-5247(20)30223-8.Epub 2021 Feb 2
3. Gavriatopoulou M, Ntanasis-Stathopoulos I, Korompoki E, Fotiou D, Migkou M, Tzanninis IG, Psaltopoulou T, Kastritis E, Terpos E, Dimopoulos MA. Emerging treatment strategies for COVID-19 infection. *Clin Exp Med*. 2021 May;21(2):167-179. doi: 10.1007/s10238-020-00671-y. Epub 2020 Oct 30. PMID: 33128197; PMCID: PMC759894
4. Dwek, Raymond A et al. "Targeting glycosylation as a therapeutic approach." *Nature reviews. Drug discovery* vol. 1,1 (2002): 65-75. doi:10.1038/nrd708
5. Angus, Derek C et al. "The REMAP-CAP (Randomized Embedded Multifactorial Adaptive Platform for Community-acquired Pneumonia) Study. Rationale and Design." *Annals of the American Thoracic Society* vol. 17,7 (2020): 879-891. doi:10.1513/AnnalsATS.202003-192SD
6. Alfaro-Lara, et al. Systematic review and meta-analysis of the efficacy and safety of leflunomide and methotrexate in the treatment of rheumatoid arthritis. *Reumatol Clin*. 2019 May - Jun;15(3):133-1
7. Xiong R, Zhang L, Li S, Sun Y, Ding M, Wang Y, Zhao Y, Wu Y, Shang W, Jiang X, Shan J, Shen Z, Tong Y, Xu L, Chen Y, Liu Y, Zou G, Lavillete D, Zhao Z, Wang R, Zhu L, Xiao G, Lan K, Li H, Xu K. Novel and potent inhibitors targeting DHODH are broad-spectrum antivirals against RNA viruses including newly-emerged coronavirus SARS-CoV-2. *Protein Cell*. 2020 Oct;11(10):723-739. doi: 10.1007/s13238-020-00768-w. Epub 2020 Aug 4. Erratum in: *Protein Cell*. 2021 Jan;12(1):76-80. Erratum in: *Protein Cell*. 2020 Nov 9;: PMID: 32754890; PMCID: PMC7402641.
8. Yao, H. W.; Li, J.; Chen, J. Q.; Xu, S. Y. A 771726, the active metabolite of leflunomide, inhibits TNF- $\alpha$  and IL-1 from Kupffer cells. *Inflammation* 2004, 28 (2), 97-103.
9. Li, L. et al. The effects of teriflunomide on lymphocyte subpopulations in human peripheral blood mononuclear cells in vitro. *J. Neuroimmunol*. 2013, 265 (1-2), 82-90.
10. <https://www.rcplondon.ac.uk/projects/outputs/national-early-warning-score-news-2>
11. [https://ctep.cancer.gov/protocoldevelopment/electronic\\_applications/ctc.htm#ctc\\_60](https://ctep.cancer.gov/protocoldevelopment/electronic_applications/ctc.htm#ctc_60)
12. Mandal S, Barnett J, Brill SE ARC Study Group, et al. 'Long-COVID': a cross-sectional study of persisting symptoms, biomarker and imaging abnormalities following hospitalisation for COVID-19. *Thorax* 2021;76:396-398.
13. <http://www.who.int/blueprint/priority-diseases/key-action/novel-coronavirus/en/>.
14. Machin D, Campbell M, Fayers, P, Pinol A (1997) *Sample Size Tables for Clinical Studies*. Second Ed. Blackwell Science IBSN 0-86542-870-0 p. 176-177
15. Hu, Ke et al. "A Small-Scale Medication of Leflunomide as a Treatment of COVID-19 in an Open-Label Blank-Controlled Clinical Trial." *Virologica Sinica* vol. 35,6 (2020): 725-733. doi:10.1007/s12250-020-00258-7
16. Wang, Qiang et al. "Efficacy and Safety of Leflunomide for Refractory COVID-19: A Pilot Study." *Frontiers in pharmacology* vol. 12 581833. 2 Jul. 2021, doi:10.3389/fphar.2021.581833

17. Mengmei Wang, Yang Zhao, Weihua Hu, Dong Zhao, Yunting Zhang, Tao Wang, Zhishui Zheng, Xiaochen Li, Shaolin Zeng, Zhenlian Liu. Treatment of Coronavirus Disease 2019 Patients With Prolonged Postsymptomatic Viral Shedding With Leflunomide: A Single-center Randomized Controlled Clinical Trial. *Clinical Infectious Diseases*, Volume 73, Issue 11, 1 December 2021, Pages e4012–e4019, <https://doi.org/10.1093/cid/ciaa1417>
18. Huang, Chaolin et al. “Clinical features of patients infected with 2019 novel coronavirus in Wuhan, China.” *Lancet (London, England)* vol. 395,10223 (2020): 497-506. doi:10.1016/S0140-6736(20)30183-5
19. ISARIC Clinical Characterisation Group. “COVID-19 symptoms at hospital admission vary with age and sex: ISARIC multinational study.” *medRxiv : the preprint server for health sciences* 2020.10.26.20219519. 19 Nov. 2020, doi:10.1101/2020.10.26.20219519. Preprint.
20. Chakravarty EF, Sanchez-Yamamoto D, Bush TM. The use of disease modifying antirheumatic drugs in women with rheumatoid arthritis of childbearing age: a survey of practice pattern and pregnancy outcomes. *J Rheumatol.* 2003;30:241–6.
21. Atsushi Ogata, Yasuhiro Kato, Shinji Higa, Kazuyuki Yoshizaki, IL-6 inhibitor for the treatment of rheumatoid arthritis: A comprehensive review, *Modern Rheumatology*, Volume 29, Issue 2, 4 March 2019, Pages 258–267, <https://doi.org/10.1080/14397595.2018.1546357>
22. REMAP-CAP Investigators et al. “Interleukin-6 Receptor Antagonists in Critically Ill Patients with COVID-19.” *The New England journal of medicine* vol. 384,16 (2021): 1491-1502. doi:10.1056/NEJMoa2100433
23. Abani, O., Abbas, A., Abbas, F., Abbas, M., Abbasi, S., Abbass, H., et al. (2021). Tocilizumab in Patients Admitted to Hospital with COVID-19 (RECOVERY): a Randomised, Controlled, Open-Label, Platform Trial. *The Lancet* 397, 1637–1645. doi:10.1016/S0140-6736(21)00676-0
24. WHO Rapid Evidence Appraisal for COVID-19 Therapies (REACT) Working Group et al. “Association Between Administration of Systemic Corticosteroids and Mortality Among Critically Ill Patients With COVID-19: A Meta-analysis.” *JAMA* vol. 324,13 (2020): 1330-1341. doi:10.1001/jama.2020.17023
25. Kraan MC, Smeets TJM, van Loon MJ, et al Differential effects of leflunomide and methotrexate on cytokine production in rheumatoid arthritis *Annals of the Rheumatic Diseases* 2004;63:1056-1061.
26. Wang, Shihang et al. “Molecular evolutionary characteristics of SARS-CoV-2 emerging in the United States.” *Journal of medical virology* vol. 94,1 (2022): 310-317. doi:10.1002/jmv.27331

## Figure legends:

**Figure 1: Randomisation, treatment assignment and follow up of DEFEAT-COVID study participant.**

*\*= immunotherapy included Tocilizumab, Bevacizumab and Interferon alpha and beta.*

**Figure 2: Time to clinical improvement of 2 points on a clinical status scale or discharge prior 28 day in a stratified ITT analysis (primary outcome).**

*Patients who died were censored at the time their death occurred, while all surviving patients who did not reach TICI criteria by day 28 were right censored at that point. Most of the patients were discharged within the first 10 days of admission.*

**Figure 3: Cumulative all-cause mortality (A), oxygen dependence (B) by 28 days**

**Figure 4: Mean changes in log<sup>10</sup> viral load (copies/ml) from baseline.**

*Error bars represent standard error. Numbers in the bars represent the number of samples available for measurements.*



Randomisation, treatment assignment and follow up of DEFEAT-COVID study participant.  
 \*= immunotherapy included Tocilizumab, Bevacizumab and Interferon alpha and beta.

190x338mm (96 x 96 DPI)



|       |     |    |    |    |   |   |
|-------|-----|----|----|----|---|---|
| SOC   | 110 | 90 | 31 | 4  | 3 | 1 |
| SOC+L | 104 | 82 | 15 | 10 | 3 | 1 |

Patients who died were censored at the time their death occurred, while all surviving patients who did not reach TICI criteria by day 28 were right censored at that point. Most of the patients were discharged within the first 10 days of admission.

338x190mm (96 x 96 DPI)

A)



B)



Cumulative all-cause mortality (A), oxygen dependence (B) by 28 days

190x338mm (96 x 96 DPI)



Mean changes in log<sub>10</sub> viral load (copies/ml) from baseline. Error bars represent standard error. Numbers in the bars represent the number of samples available for measurements.

338x190mm (96 x 96 DPI)

| Trial procedures                                                                                         | Screening | Day 0/1 (BL) | Daily          | Day 3          | Day 7 | Day 11 +/- 1 | Day 15 +/- 1 | Day 28 +/- 1   | DC             | Day 90 +/- 7   |
|----------------------------------------------------------------------------------------------------------|-----------|--------------|----------------|----------------|-------|--------------|--------------|----------------|----------------|----------------|
| Confirmation of COVID Infection and severity                                                             | X         |              |                |                |       |              |              |                |                |                |
| Informed consent & Eligibility Assessment                                                                | X         |              |                |                |       |              |              |                |                |                |
| Demographics, Medical Hx, Cardiopulmonary Assessment (including ECG <sup>1</sup> & Echo <sup>2</sup> )   | X         |              |                |                |       |              |              |                |                |                |
| Concomitant medication                                                                                   |           | X            | X              |                |       |              |              | X <sup>7</sup> |                | X              |
| Bloods – FBC, U&Es, LFT (AST <sup>6</sup> & ALT <sup>6</sup> )                                           |           | X            | X <sup>5</sup> | X <sup>6</sup> |       |              |              |                | X              |                |
| – Clotting screen, Fibrinogen, D-Dimer, Ferritin                                                         |           | X            | X <sup>5</sup> |                |       |              |              |                |                |                |
| – Glucose                                                                                                |           | X            | X <sup>5</sup> |                |       |              |              |                |                |                |
| – Creatine Kinase, Troponin, BNP (NT-proBNP)                                                             |           | X            | X <sup>5</sup> |                |       |              |              |                |                |                |
| – Procalcitonin, CRP, LDH                                                                                |           | X            | X <sup>5</sup> | X              |       | X            |              |                |                |                |
| – HIV                                                                                                    |           | X            |                |                |       |              |              |                |                |                |
| – Cytokine profile                                                                                       |           | X            |                | X              |       | X            |              |                | X <sup>8</sup> |                |
| Pregnancy test (urine sample)                                                                            |           | X            |                |                |       |              |              |                |                |                |
| Viral Load (nasopharyngeal swab)                                                                         |           | X            |                |                | X     | X            | X            | X              | X <sup>8</sup> |                |
| Randomisation                                                                                            |           | X            |                |                |       |              |              |                |                |                |
| IMP dispense, loading (daily from Day 0/1 to 3) / maintenance dose (daily from Day 4 to 10) <sup>3</sup> |           | X            |                |                |       |              |              |                |                |                |
| Primary outcome assessment (TTCI)                                                                        |           | X            | X              |                |       |              |              | X <sup>7</sup> |                |                |
| Clinical Assessment, e.g. NEWS 2, body T°C*, vital signs, imaging**                                      | X         | X            | X <sup>5</sup> |                |       |              |              |                |                |                |
| *Blood and Urine cultures (in presence of fever)                                                         |           | X            | X <sup>5</sup> |                |       |              |              |                |                |                |
| **Urine for legionella and pneumococcal                                                                  |           | X            | X <sup>5</sup> |                |       |              |              |                |                |                |
| Oxygenation assessment e.g. O <sub>2</sub> delivery method and level [SpO <sub>2</sub> ]                 |           | X            | X <sup>5</sup> |                |       |              |              |                |                |                |
| Arterial Blood Gas (ABG) – as available and where applicable                                             |           | X            | X <sup>5</sup> |                |       |              |              |                |                |                |
| Serious Adverse Event(s) (SAE(s))/ Adverse Event(s) (AE(s)) <sup>4</sup>                                 |           |              | X              |                |       |              |              | X <sup>7</sup> |                | X <sup>9</sup> |
| Out-patient assessment (telephone call)                                                                  |           |              |                |                |       |              |              | X <sup>7</sup> |                | X              |

### Data collected and study time points

**Key:** BL – Baseline; IMP – Investigation Medicinal Product (trial treatment i.e. trial drug); SOC - Standard of Care; DC Discharge.

**Notes:** **1.** Check medical notes, if abnormal flag repeat imaging; **2.** Echo within 6 months to be used if no cardiac symptoms; **3.** Participant to take home IMP if DC'd; **4.** Participant to self-report events between DC to Day 90; **5.** Completed Daily, depending on clinical need and resources. If participant is DC'd early – record what is available as part of SOC; **6.** AST/ALT *must* be checked for treatment arm to determine maintenance dose; **7.** Participant DC'd called on Day 28 for Treatment Assessments, if not seen on-site; **8.** Cytokines/Viral Load to be collected if outside of scheduled collection. Day 11 is the last collection for Cytokines. on DC Medium (telephone call) and long term (by Sponsor) Treatment Assessments respectively.



1  
2  
3  
4  
5  
6  
7  
8  
9  
10  
11  
12  
13  
14  
15  
16  
17  
18  
19  
20  
21  
22  
23  
24  
25  
26  
27  
28  
29  
30  
31  
32  
33  
34  
35  
36  
37  
38  
39  
40  
41  
42  
43  
44  
45  
46  
47  
48  
49  
50  
51  
52  
53  
54  
55  
56  
57  
58  
59  
60

| Centre      | Group        | N   | Corticosteroid | Anticoagulant | Antiviral | Antibiotic | Immunotherapy* | Hydroxychloroquine |
|-------------|--------------|-----|----------------|---------------|-----------|------------|----------------|--------------------|
| UK          | Intervention | 30  | 100%           | 97%           | 69%       | 100%       | 14%            | 3%                 |
|             | Control      | 36  | 100%           | 100%          | 81%       | 100%       | 3%             | 3%                 |
| India       | Intervention | 74  | 87%            | 76%           | 70%       | 76%        | 67%            | 93%                |
|             | Control      | 74  | 89%            | 84%           | 70%       | 88%        | 50%            | 94%                |
| All Centres | Intervention | 104 | 95%            | 79%           | 56%       | 90%        | 23%            | 47%                |
|             | Control      | 110 | 96%            | 80%           | 56%       | 96%        | 19%            | 47%                |

**Supplementary Table 1: Standard of care therapy in the UK and India**

*\*The "Immunotherapy" includes tocilizumab, bevacizumab, interferon alpha and beta*

| Adverse events categorised per MedDRA terminology   |                    |                  |
|-----------------------------------------------------|--------------------|------------------|
|                                                     | SOC+L<br>(n = 104) | SOC<br>(n = 110) |
| Patients with at least one reported AE, n (%)       | 56 (53.8%)         | 42 (38.2%)       |
| All adverse events, n                               | 121                | 91               |
| Blood and lymphatic system disorder                 |                    |                  |
| - DIC                                               | 1                  | 4                |
| - Lymph node enlargement                            | 1                  | 0                |
| - Hilar lymphadenopathy                             | 1                  | 0                |
| - Thrombocytopenia                                  | 4                  | 4                |
| - Neutropenia                                       | 0                  | 1                |
| - Splenomegaly                                      | 1                  | 0                |
| Cardiac Disorder                                    |                    |                  |
| - Acute coronary syndrome                           | 2                  | 1                |
| - Aortic Valve disease                              | 2                  | 0                |
| - Atrial fibrillation                               | 2                  | 5                |
| - Chest pain                                        | 1                  | 0                |
| - Left ventricular systolic dysfunction             | 1                  | 0                |
| - Conduction disorder                               | 0                  | 1                |
| - Infective endocarditis                            | 1                  | 0                |
| - Tachycardia (sinus)                               | 2                  | 0                |
| Endocrine disorder                                  |                    |                  |
| - Adrenal adenoma                                   | 1                  | 0                |
| Eye disorder                                        |                    |                  |
| - Dry eye                                           | 0                  | 1                |
| General disorders and administration site condition |                    |                  |
| - Lethargy                                          | 1                  | 0                |
| Gastrointestinal disorders                          |                    |                  |
| - Diarrhoea                                         | 1                  | 1                |
| - Gastritis                                         | 1                  | 0                |
| - Gastric haemorrhage                               | 2                  | 0                |

|                                                |    |    |
|------------------------------------------------|----|----|
| - Hiatus hernia                                | 1  | 0  |
| - Rectal haemorrhage                           | 0  | 1  |
| - Mucositis oral                               | 1  | 0  |
| - Dyspepsia                                    | 2  | 0  |
| - Emesis                                       | 1  | 0  |
| Hepatobiliary disorders                        |    |    |
| - Acute liver dysfunction                      | 1  | 1  |
| - Cholelithiasis                               | 2  | 0  |
| - Hepatic granuloma                            | 1  | 0  |
| - Liver steatosis                              | 1  | 0  |
| Infection and infestations                     |    |    |
| - Sepsis                                       | 0  | 1  |
| Investigation                                  |    |    |
| - APTT prolonged                               | 1  | 0  |
| - ALP increased                                | 1  | 0  |
| - Bil increased                                | 3  | 0  |
| - Il-6 increased                               | 1  | 0  |
| - Leucocytosis                                 | 1  | 2  |
| - ALT/AST increased                            | 27 | 12 |
| - Sgot increased                               | 2  | 0  |
| Metabolism and nutrition disorder              |    |    |
| - Hyperglycaemia                               | 2  | 6  |
| - Hyperkalaemia                                | 0  | 1  |
| - Hyponatraemia                                | 1  | 1  |
| - hypomagnesaemia                              | 0  | 1  |
| Musculoskeletal and connective tissue disorder |    |    |
| - Discitis                                     | 1  | 0  |
| Neoplasms                                      |    |    |
| - Lung cancer                                  | 1  | 0  |
| Nervous system disorder                        |    |    |
| - 6 <sup>th</sup> nerve palsy                  | 0  | 1  |

|                                                |   |   |
|------------------------------------------------|---|---|
| - Dysphasia                                    | 0 | 1 |
| - Cognitive disturbances                       | 1 | 0 |
| - Cerebellar calcification                     | 0 | 1 |
| - Lower limb weakness                          | 1 | 0 |
| - Dysphagia                                    | 0 | 1 |
| - Hemiparesis                                  | 0 | 1 |
| - Headache                                     | 1 | 0 |
| - Intracranial haemorrhage                     | 0 | 1 |
| Psychiatric disorders                          |   |   |
| - Anxiety                                      | 2 | 1 |
| - Delirium                                     | 0 | 2 |
| Renal and urinary disorders                    |   |   |
| - Acute kidney injury                          | 5 | 5 |
| - Haematuria                                   | 1 | 0 |
| - Urinary urgency                              | 1 | 0 |
| Respiratory thoracic and mediastinal disorders |   |   |
| - ARDS                                         |   |   |
| - Wheezing                                     | 1 | 0 |
| - Atelectasis                                  | 0 | 1 |
| - Hypoxia                                      | 0 | 1 |
| - Exacerbation of COPD                         | 5 | 7 |
| - Hoarseness                                   | 3 | 2 |
| - Dyspnoea                                     | 0 | 1 |
| - Pneumonitis                                  | 4 | 3 |
| - Epistaxis                                    | 1 | 0 |
| - Haemoptysis                                  | 3 | 1 |
| - Respiratory failure                          | 0 | 1 |
| - Pneumothorax                                 | 2 | 0 |
| - (subcutaneous emphysema)                     | 0 | 1 |
|                                                | 0 | 1 |
| Reproductive system and breast disorders       |   |   |
| - Endometrium thickening                       | 1 | 0 |

|                                 |   |    |
|---------------------------------|---|----|
| Surgical and medical procedures |   |    |
| - Aortic valve replacement      | 1 | 0  |
| - Loop recorder implant         | 0 | 1  |
| Vascular disorder               |   |    |
| - Aortic aneurysm               | 1 | 0  |
| - Thromboembolic events         |   |    |
| ○ DVT                           | 1 | 0  |
| ○ Bilateral pedal vasculopathy  | 0 | 1  |
| ○ Pulmonary embolism            | 1 | 1  |
| - Hypertension                  | 0 | 1  |
| Death                           | 9 | 10 |

**Supplementary Table 2: All adverse events**

|                                                             |                         | Baseline      |            | Day 1 – 3/4      |            | Day 4/5 – Discharge |            |
|-------------------------------------------------------------|-------------------------|---------------|------------|------------------|------------|---------------------|------------|
|                                                             |                         | UK            | India      | UK               | India      | UK                  | India      |
| <b>ALT</b>                                                  |                         |               |            |                  |            |                     |            |
| <b>SOC + L</b>                                              | <b>Median (IQR) U/L</b> | 48 (30-60)    |            | 67 (36-87)       |            | 44 (36-71)          |            |
|                                                             |                         | 48 (32-71)    | 47 (29-59) | 59 (37-94)       | 72 (34-86) | 62(34-151)          | 42(35-56)  |
|                                                             | <b>1 - 2 x ULN (n)</b>  | 44            |            | 50               |            | 17                  |            |
|                                                             |                         | 12            | 32         | 9                | 41         | 4                   | 13         |
|                                                             | <b>2 - 3 x ULN (n)</b>  | 1             |            | 6                |            | 6                   |            |
|                                                             |                         | 1             | 0          | 3                | 3          | 2                   | 4          |
|                                                             | <b>&gt; 3 x ULN (n)</b> | 1             |            | 8                |            | 5                   |            |
|                                                             |                         | 1             | 0          | 3                | 5          | 4                   | 1          |
|                                                             | <b>&gt;ULN</b>          | 14            |            | 49               |            | 18                  |            |
|                                                             |                         |               |            |                  |            |                     |            |
| <b>SOC</b>                                                  | <b>Median (IQR) U/L</b> | 39 (26-56)    |            | 44 (34-65)       |            | 41 (35-52)          |            |
|                                                             |                         | 40 (27-59)    | 38 (25-54) | 44 (31-63)       | 44 (36-67) | 49 (33-63)          | 40 (35-52) |
|                                                             | <b>1 - 2 x ULN (n)</b>  | 33            |            | 29               |            | 24                  |            |
|                                                             |                         | 13            | 20         | 8                | 21         | 7                   | 17         |
|                                                             | <b>2 - 3 x ULN (n)</b>  | 0             |            | 9                |            | 3                   |            |
|                                                             |                         | 0             | 0          | 2                | 7          | 2                   | 1          |
|                                                             | <b>&gt;3 x ULN (n)</b>  | 0             |            | 0                |            | 0                   |            |
|                                                             |                         | 0             | 0          | 0                | 0          | 0                   | 0          |
|                                                             | <b>&gt;ULN</b>          | 13            |            | 28               |            | 18                  |            |
|                                                             |                         |               |            |                  |            |                     |            |
| <b>p value of abnormal ALT counts between SOC+L and SOC</b> |                         | <b>0.049</b>  |            | <b>&lt;0.001</b> |            | <b>0.633</b>        |            |
| <b>AST</b>                                                  |                         |               |            |                  |            |                     |            |
| <b>SOC + L</b>                                              | <b>Median (IQR) U/L</b> | 44 (30-54)    |            | 55(31-77)        |            | 41(27-50)           |            |
|                                                             |                         | 60 (42-102)   | 43(29-50)  | 58 (42-104)      | 53 (28-76) | 54 (29-102)         | 40 (27-49) |
|                                                             | <b>1 - 2 x ULN (n)</b>  | 28            |            | 36               |            | 18                  |            |
|                                                             |                         | 4             | 24         | 8                | 28         | 3                   | 15         |
|                                                             | <b>2 - 3 x ULN (n)</b>  | 2             |            | 9                |            | 1                   |            |
|                                                             |                         | 2             | 0          | 2                | 7          | 1                   | 0          |
|                                                             | <b>&gt; 3 x ULN (n)</b> | 1             |            | 6                |            | 1                   |            |
|                                                             |                         | 1             | 0          | 2                | 4          | 1                   | 0          |
|                                                             | <b>&gt;ULN</b>          | 7             |            | 39               |            | 15                  |            |
|                                                             |                         |               |            |                  |            |                     |            |
| <b>SOC</b>                                                  | <b>Median (IQR) U/L</b> | 39 (28-52)    |            | 39 (29-54)       |            | 37(27-47)           |            |
|                                                             |                         | 57 (34-75)    | 37(26-48)  | 45(38-55)        | 38(28-54)  | 45 (35-61)          | 37 (25-46) |
|                                                             | <b>1 - 2 x ULN (n)</b>  | 22            |            | 18               |            | 16                  |            |
|                                                             |                         | 6             | 16         | 4                | 14         | 4                   | 12         |
|                                                             | <b>2 - 3 x ULN (n)</b>  | 2             |            | 5                |            | 0                   |            |
|                                                             |                         | 2             | 0          | 0                | 5          | 0                   | 0          |
|                                                             | <b>&gt;3 x ULN (n)</b>  | 0             |            | 1                |            | 1                   |            |
|                                                             |                         | 0             | 0          | 0                | 1          | 1                   | 0          |
|                                                             | <b>&gt;ULN</b>          | 8             |            | 20               |            | 12                  |            |
|                                                             |                         |               |            |                  |            |                     |            |
| <b>p value of abnormal ALT counts between SOC+L and SOC</b> |                         | <b>0.3222</b> |            | <b>&lt;0.001</b> |            | <b>0.318</b>        |            |

### Supplementary Table 3: Liver enzymes measurements

ULN: upper limits of normal (ALT: 10-49 U/L; AST 19 – 48U/L). ALT: alanine transaminase. AST: aspartate transaminase; SOC + L: n = 30 UK, 74 India; SOC: n = 36 UK, 74 India

1  
2  
3  
4  
5  
6  
7  
8  
9  
10  
11  
12  
13  
14  
15  
16  
17  
18  
19  
20  
21  
22  
23  
24  
25  
26  
27  
28  
29  
30  
31  
32  
33  
34  
35  
36  
37  
38  
39  
40  
41  
42  
43  
44  
45  
46  
47  
48  
49  
50  
51  
52  
53  
54  
55  
56  
57  
58  
59  
60

|                           | Day 28          |                 |               |                 |       | Day 90          |                 |               |                 |    |
|---------------------------|-----------------|-----------------|---------------|-----------------|-------|-----------------|-----------------|---------------|-----------------|----|
|                           | SOC+L<br>(n=81) |                 | SOC<br>(n=91) |                 | p*    | SOC+L<br>(n=81) |                 | SOC<br>(n=91) |                 | p* |
|                           | %               | Median<br>(IQR) | %             | Median (IQR)    |       | %               | Median (IQR)    | %             | Median (IQR)    |    |
| <b>Fatigue</b>            | 29.6            | 5.00(2.75-8.00) | 31.9          | 5.00(3.00-8.00) | 0.751 | 22.2            | 5.00(3.25-7.00) | 26.4          | 3.00(2.00-4.25) | NS |
| <b>Cough</b>              | 13.6            | 2.00(1.00-4.50) | 18.7          | 2.00(1.00-4.00) | 0.366 | 7.41            | 1.00(1.00-6.25) | 8.79          | 2.50(1.00-3.50) | NS |
| <b>Anxiety</b>            | 24.7            | 3.50(2.00-7.25) | 19.8          | 4.00(3.00-7.75) | 0.438 | 21.0            | 3.00(1.00-5.00) | 19.8          | 2.00(1.00-3.75) | NS |
| <b>Chest pains</b>        | 11.1            | 4.00(2.00-7.00) | 8.79          | 4.00(2.50-5.00) | 0.611 | 7.41            | 4.00(3.25-7.75) | 6.59          | 3.00(1.25-7.75) | NS |
| <b>Brain fog</b>          | 14.8            | 5.00(3.75-7.25) | 16.5          | 5.00(1.50-7.00) | 0.764 | 14.8            | 3.50(1.75-5.00) | 12.1          | 4.00(2.50-4.50) | NS |
| <b>Breathlessness</b>     | 40.7            | 2.00(1.00-6.00) | 42.9          | 1.00(1.00-7.00) | 0.779 | 22.2            | 5.00(1.00-7.00) | 20.9          | 4.00(2.00-4.00) | NS |
| <b>Sleep quality</b>      | 48.2            | 2.00(1.00-5.00) | 38.5          | 3.00(1.00-6.00) | 0.200 | 34.6            | 2.00(1.00-4.25) | 33.0          | 2.50(1.00-5.75) | NS |
| <b>Palpitations</b>       | 8.64            | 7.00(1.50-9.00) | 5.49          | 1.00(1.00-7.00) | 0.419 | 4.94            | 4.50(3.50-5.00) | 3.30          | 1.00(1.00-4.00) | NS |
| <b>Joint pain</b>         | 32.1            | 3.00(1.00-4.75) | 33.0          | 2.00(1.00-4.00) | 0.903 | 22.2            | 3.50(2.00-7.00) | 19.8          | 2.00(2.00-4.50) | NS |
| <b>Myalgia</b>            | 18.5            | -               | 19.8          |                 | 0.834 | 17.3            |                 | 11.0          |                 | NS |
| <b>Anosmia</b>            | 6.17            | -               | 11.0          |                 | 0.264 | 2.47            |                 | -             |                 | -  |
| <b>Loss of taste</b>      | 9.88            | -               | 14.3          |                 | 0.378 | 7.41            |                 | -             |                 | -  |
| <b>Depression</b>         | 19.8            | 1.50(1.00-3.00) | 18.7          | 1.00(1.00-2.00) | 0.859 | 11.1            | 1.00(1.00-1.00) | 11.0          | 1.00(1.00-2.00) | NS |
| <b>Loss of interest</b>   | 12.4            | 2.50(1.25-3.00) | 16.5          | 1.00(1.00-3.00) | 0.442 | 9.88            | 1.00(1.00-1.25) | 7.69          | 1.00(1.00-2.50) | NS |
| <b>Dyspnoea; Mild (1)</b> | 59.3            | 1.00(1.00-2.00) | 47.3          | 2.00(1.00-2.00) | 0.155 | 80.3            | 1.00(1.00-1.00) | 81.3          | 1.00(1.00-1.00) | NS |
| <b>Moderate (2-3)</b>     | 29.6            |                 | 39.6          |                 | 0.173 | 14.8            |                 | 17.6          |                 |    |
| <b>Severe (4-5)</b>       | 11.1            |                 | 13.2          |                 | 0.678 | 4.94            |                 | 1.10          |                 |    |

#### Supplementary Table 4: Long COVID symptoms at 28 and 90 days after randomisation

*p*: alpha value. Statistical significance was assumed at 0.05 alpha value. To best summarise the data, symptom scales (e.g. 0-10) for all symptoms (except dyspnoea, which was measured in different terms) were binarized, accepting any score above 0 as prevalence (%) of experiencing that symptom. To reflect magnitude of symptom severity, median (IQR) of individual symptom scores (except for dyspnoea, myalgia, anosmia and loss of taste) were taken excluding scores of 0. For dyspnoea, prevalence (%) of the symptom was determined as the proportion of patients scoring any relevant category (e.g., mild, moderate, severe), and median (IQR) of symptom severity included all score values. Between-group differences at each point of follow-up (day 28 and day 90) for all symptoms were evaluated using patient proportions from the binarized symptom scales via the chi-square test of differences. The Shapiro-wilk test was used to assess statistical normality. No analysis was enabled for any day reporting  $n \leq 3$  datapoints per group for statistical reliability

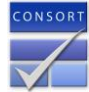

## CONSORT 2010 checklist of information to include when reporting a randomised trial\*

| Section/Topic                    | Item No | Checklist item                                                                                                                                                                              | Reported on page No |
|----------------------------------|---------|---------------------------------------------------------------------------------------------------------------------------------------------------------------------------------------------|---------------------|
| <b>Title and abstract</b>        |         |                                                                                                                                                                                             |                     |
|                                  | 1a      | Identification as a randomised trial in the title                                                                                                                                           | 1                   |
|                                  | 1b      | Structured summary of trial design, methods, results, and conclusions (for specific guidance see CONSORT for abstracts)                                                                     | 2                   |
| <b>Introduction</b>              |         |                                                                                                                                                                                             |                     |
| Background and objectives        | 2a      | Scientific background and explanation of rationale                                                                                                                                          | 4,5,6               |
|                                  | 2b      | Specific objectives or hypotheses                                                                                                                                                           | 5,6                 |
| <b>Methods</b>                   |         |                                                                                                                                                                                             |                     |
| Trial design                     | 3a      | Description of trial design (such as parallel, factorial) including allocation ratio                                                                                                        | 4,5,6               |
|                                  | 3b      | Important changes to methods after trial commencement (such as eligibility criteria), with reasons                                                                                          | NA                  |
| Participants                     | 4a      | Eligibility criteria for participants                                                                                                                                                       | 4                   |
|                                  | 4b      | Settings and locations where the data were collected                                                                                                                                        | 4,5                 |
| Interventions                    | 5       | The interventions for each group with sufficient details to allow replication, including how and when they were actually administered                                                       | 5                   |
| Outcomes                         | 6a      | Completely defined pre-specified primary and secondary outcome measures, including how and when they were assessed                                                                          | 5,6,7               |
|                                  | 6b      | Any changes to trial outcomes after the trial commenced, with reasons                                                                                                                       | NA                  |
| Sample size                      | 7a      | How sample size was determined                                                                                                                                                              | 6                   |
|                                  | 7b      | When applicable, explanation of any interim analyses and stopping guidelines                                                                                                                | NA                  |
| <b>Randomisation:</b>            |         |                                                                                                                                                                                             |                     |
| Sequence generation              | 8a      | Method used to generate the random allocation sequence                                                                                                                                      | 4                   |
|                                  | 8b      | Type of randomisation; details of any restriction (such as blocking and block size)                                                                                                         | 5                   |
| Allocation concealment mechanism | 9       | Mechanism used to implement the random allocation sequence (such as sequentially numbered containers), describing any steps taken to conceal the sequence until interventions were assigned | NA                  |
| Implementation                   | 10      | Who generated the random allocation sequence, who enrolled participants, and who assigned participants to interventions                                                                     | 4,5                 |
| Blinding                         | 11a     | If done, who was blinded after assignment to interventions (for example, participants, care providers, those                                                                                | NA                  |



|                                                      |     |                                                                                                                                                   |                  |
|------------------------------------------------------|-----|---------------------------------------------------------------------------------------------------------------------------------------------------|------------------|
|                                                      |     | assessing outcomes) and how                                                                                                                       |                  |
|                                                      | 11b | If relevant, description of the similarity of interventions                                                                                       | NA               |
| Statistical methods                                  | 12a | Statistical methods used to compare groups for primary and secondary outcomes                                                                     | 5,6              |
|                                                      | 12b | Methods for additional analyses, such as subgroup analyses and adjusted analyses                                                                  | 5,6              |
| <b>Results</b>                                       |     |                                                                                                                                                   |                  |
| Participant flow (a diagram is strongly recommended) | 13a | For each group, the numbers of participants who were randomly assigned, received intended treatment, and were analysed for the primary outcome    | Figure 1, page 7 |
|                                                      | 13b | For each group, losses and exclusions after randomisation, together with reasons                                                                  | Figure 1, page 7 |
| Recruitment                                          | 14a | Dates defining the periods of recruitment and follow-up                                                                                           | 7                |
|                                                      | 14b | Why the trial ended or was stopped                                                                                                                | NA               |
| Baseline data                                        | 15  | A table showing baseline demographic and clinical characteristics for each group                                                                  | Table 1          |
| Numbers analysed                                     | 16  | For each group, number of participants (denominator) included in each analysis and whether the analysis was by original assigned groups           | 7, Figure 1      |
| Outcomes and estimation                              | 17a | For each primary and secondary outcome, results for each group, and the estimated effect size and its precision (such as 95% confidence interval) | 5,6              |
|                                                      | 17b | For binary outcomes, presentation of both absolute and relative effect sizes is recommended                                                       | 5,6              |
| Ancillary analyses                                   | 18  | Results of any other analyses performed, including subgroup analyses and adjusted analyses, distinguishing pre-specified from exploratory         | 5,6,7,8,9        |
| Harms                                                | 19  | All important harms or unintended effects in each group (for specific guidance see CONSORT for harms)                                             | NA               |
| <b>Discussion</b>                                    |     |                                                                                                                                                   |                  |
| Limitations                                          | 20  | Trial limitations, addressing sources of potential bias, imprecision, and, if relevant, multiplicity of analyses                                  | 12               |
| Generalisability                                     | 21  | Generalisability (external validity, applicability) of the trial findings                                                                         |                  |
| Interpretation                                       | 22  | Interpretation consistent with results, balancing benefits and harms, and considering other relevant evidence                                     | 13               |
| <b>Other information</b>                             |     |                                                                                                                                                   |                  |
| Registration                                         | 23  | Registration number and name of trial registry                                                                                                    | 2                |
| Protocol                                             | 24  | Where the full trial protocol can be accessed, if available                                                                                       | NA               |
| Funding                                              | 25  | Sources of funding and other support (such as supply of drugs), role of funders                                                                   | 2,13             |

\*We strongly recommend reading this statement in conjunction with the CONSORT 2010 Explanation and Elaboration for important clarifications on all the items. If relevant, we also recommend reading CONSORT extensions for cluster randomised trials, non-inferiority and equivalence trials, non-pharmacological treatments, herbal interventions, and pragmatic trials. Additional extensions are forthcoming: for those and for up to date references relevant to this checklist, see [www.consort-statement.org](http://www.consort-statement.org).
