# Supplementary material for: Leflunomide treatment for patients hospitalised with COVID-19: DEFEAT-COVID randomised controlled trial
Source: PubMed Central journal article supplement — BMJ Open. 2023 Apr 13;13(4):e068179. doi: 10.1136/bmjopen-2022-068179 (PMC10105917; doi:10.1136/bmjopen-2022-068179), 2023-04-13
Supplement: bmjopen-2022-068179supp001.pdf [file bmjopen-2022-068179supp001.pdf]

| Trial procedures                                                                                         | Screening | Day 0/1 (BL) | Daily          | Day3           | Day7 | Day11 +/-1 | Day15 +/-1 | Day28 +/-1     | DC             | Day90 +/- 7    |
|----------------------------------------------------------------------------------------------------------|-----------|--------------|----------------|----------------|------|------------|------------|----------------|----------------|----------------|
| Confirmation of COVID Infection and severity                                                             | X         |              |                |                |      |            |            |                |                |                |
| Informed consent & Eligibility Assessment                                                                | X         |              |                |                |      |            |            |                |                |                |
| Demographics, Medical Hx, Cardiopulmonary Assessment (including ECG <sup>1</sup> & Echo <sup>2</sup> )   | X         |              |                |                |      |            |            |                |                |                |
| Concomitant medication                                                                                   |           | X            | X              |                |      |            |            | X <sup>7</sup> |                | X              |
| Bloods – FBC, U&Es, LFT (AST <sup>6</sup> & ALT <sup>6</sup> )                                           |           | X            | X <sup>5</sup> | X <sup>6</sup> |      |            |            |                | X              |                |
| – Clotting screen, Fibrinogen, D-Dimer, Ferritin                                                         |           | X            | X <sup>5</sup> |                |      |            |            |                |                |                |
| – Glucose                                                                                                |           | X            | X <sup>5</sup> |                |      |            |            |                |                |                |
| – Creatine Kinase, Troponin, BNP (NT-proBNP)                                                             |           | X            | X <sup>5</sup> |                |      |            |            |                |                |                |
| – Procalcitonin, CRP, LDH                                                                                |           | X            | X <sup>5</sup> | X              |      | X          |            |                |                |                |
| – HIV                                                                                                    |           | X            |                |                |      |            |            |                |                |                |
| – Cytokine profile                                                                                       |           | X            |                | X              |      | X          |            |                | X <sup>8</sup> |                |
| Pregnancy test (urine sample)                                                                            |           | X            |                |                |      |            |            |                |                |                |
| Viral Load (nasopharyngeal swab)                                                                         |           | X            |                |                | X    | X          | X          | X              | X <sup>8</sup> |                |
| Randomisation                                                                                            |           | X            |                |                |      |            |            |                |                |                |
| IMP dispense, loading (daily from Day 0/1 to 3) / maintenance dose (daily from Day 4 to 10) <sup>3</sup> |           | X            |                |                |      |            |            |                |                |                |
| Primary outcome assessment (TTCI)                                                                        |           | X            | X              |                |      |            |            | X <sup>7</sup> |                |                |
| Clinical Assessment, e.g. NEWS 2, body T°C*, vital signs, imaging**                                      | X         | X            | X <sup>5</sup> |                |      |            |            |                |                |                |
| *Blood and Urine cultures (in presence of fever)                                                         |           | X            | X <sup>5</sup> |                |      |            |            |                |                |                |
| **Urine for legionella and pneumococcal                                                                  |           | X            | X <sup>5</sup> |                |      |            |            |                |                |                |
| Oxygenation assessment e.g. O <sub>2</sub> delivery method and level [SpO <sub>2</sub> ]                 |           | X            | X <sup>5</sup> |                |      |            |            |                |                |                |
| Arterial Blood Gas (ABG) – as available and where applicable                                             |           | X            | X <sup>5</sup> |                |      |            |            |                |                |                |
| Serious Adverse Event(s) (SAE(s))/ Adverse Event(s) (AE(s)) <sup>4</sup>                                 |           |              | X              |                |      |            |            | X <sup>7</sup> |                | X <sup>9</sup> |
| Out-patient assessment (telephone call)                                                                  |           |              |                |                |      |            |            | X <sup>7</sup> |                | X              |

#### Data collected and study time points

**Key:** BL – Baseline; IMP – Investigation Medicinal Product (trial treatment i.e. trial drug); SOC - Standard of Care; DC Discharge.

**Notes:** **1.** Check medical notes, if abnormal flag repeat imaging; **2.** Echo within 6 months to be used if no cardiac symptoms; **3.** Participant to take home IMP if DC'd; **4.** Participant to self-report events between DC to Day 90; **5.** Completed Daily, depending on clinical need and resources. If participant is DC'd early – record what is available as part of SOC; **6.** AST/ALT *must* be checked for treatment arm to determine maintenance dose; **7.** Participant DC'd called on Day 28 for Treatment Assessments, if not seen on-site; **8.** Cytokines/Viral Load to be collected if outside of scheduled collection. Day 11 is the last collection for Cytokines. on DC Medium (telephone call) and long term (by Sponsor) Treatment Assessments respectively.
