# Supplementary material for: Leflunomide treatment for patients hospitalised with COVID-19: DEFEAT-COVID randomised controlled trial
Source: PubMed Central journal article supplement — BMJ Open. 2023 Apr 13;13(4):e068179. doi: 10.1136/bmjopen-2022-068179 (PMC10105917; doi:10.1136/bmjopen-2022-068179), 2023-04-13
Supplement: bmjopen-2022-068179supp002.pdf [file bmjopen-2022-068179supp002.pdf]

| Centre      | Group        | N   | Corticosteroid | Anticoagulant | Antiviral | Antibiotic | Immunotherapy* | Hydroxychloroquine |
|-------------|--------------|-----|----------------|---------------|-----------|------------|----------------|--------------------|
| UK          | Intervention | 30  | 100%           | 97%           | 69%       | 100%       | 14%            | 3%                 |
|             | Control      | 36  | 100%           | 100%          | 81%       | 100%       | 3%             | 3%                 |
| India       | Intervention | 74  | 87%            | 76%           | 70%       | 76%        | 67%            | 93%                |
|             | Control      | 74  | 89%            | 84%           | 70%       | 88%        | 50%            | 94%                |
| All centres | Intervention | 104 | 95%            | 79%           | 56%       | 90%        | 23%            | 47%                |
|             | Control      | 110 | 96%            | 80%           | 56%       | 96%        | 19%            | 47%                |

**Supplementary Table 1: Standard of care therapy in the UK and India**

*\*The "Immunotherapy" includes tocilizumab, bevacizumab, interferon alpha and beta*
