# Supplementary material for: Leflunomide treatment for patients hospitalised with COVID-19: DEFEAT-COVID randomised controlled trial
Source: PubMed Central journal article supplement — BMJ Open. 2023 Apr 13;13(4):e068179. doi: 10.1136/bmjopen-2022-068179 (PMC10105917; doi:10.1136/bmjopen-2022-068179), 2023-04-13
Supplement: bmjopen-2022-068179supp003.pdf [file bmjopen-2022-068179supp003.pdf]

| Adverse events categorised per MedDRA terminology   |                    |                  |
|-----------------------------------------------------|--------------------|------------------|
|                                                     | SOC+L<br>(n = 104) | SOC<br>(n = 110) |
| Patients with at least one reported AE, n (%)       | 56 (53.8%)         | 42 (38.2%)       |
| All adverse events, n                               | 121                | 91               |
| Blood and lymphatic system disorder                 |                    |                  |
| - DIC                                               | 1                  | 4                |
| - Lymph node enlargement                            | 1                  | 0                |
| - Hilar lymphadenopathy                             | 1                  | 0                |
| - Thrombocytopenia                                  | 4                  | 4                |
| - Neutropenia                                       | 0                  | 1                |
| - Splenomegaly                                      | 1                  | 0                |
| Cardiac Disorder                                    |                    |                  |
| - Acute coronary syndrome                           | 2                  | 1                |
| - Aortic Valve disease                              | 2                  | 0                |
| - Atrial fibrillation                               | 2                  | 5                |
| - Chest pain                                        | 1                  | 0                |
| - Left ventricular systolic dysfunction             | 1                  | 0                |
| - Conduction disorder                               | 0                  | 1                |
| - Infective endocarditis                            | 1                  | 0                |
| - Tachycardia (sinus)                               | 2                  | 0                |
| Endocrine disorder                                  |                    |                  |
| - Adrenal adenoma                                   | 1                  | 0                |
| Eye disorder                                        |                    |                  |
| - Dry eye                                           | 0                  | 1                |
| General disorders and administration site condition |                    |                  |
| - Lethargy                                          | 1                  | 0                |
| Gastrointestinal disorders                          |                    |                  |
| - Diarrhoea                                         | 1                  | 1                |
| - Gastritis                                         | 1                  | 0                |
| - Gastric haemorrhage                               | 2                  | 0                |

|                                                |    |    |
|------------------------------------------------|----|----|
| - Hiatus hernia                                | 1  | 0  |
| - Rectal haemorrhage                           | 0  | 1  |
| - Mucositis oral                               | 1  | 0  |
| - Dyspepsia                                    | 2  | 0  |
| - Emesis                                       | 1  | 0  |
| Hepatobiliary disorders                        |    |    |
| - Acute liver dysfunction                      | 1  | 1  |
| - Cholelithiasis                               | 2  | 0  |
| - Hepatic granuloma                            | 1  | 0  |
| - Liver steatosis                              | 1  | 0  |
| Infection and infestations                     |    |    |
| - Sepsis                                       | 0  | 1  |
| Investigation                                  |    |    |
| - APTT prolonged                               | 1  | 0  |
| - ALP increased                                | 1  | 0  |
| - Bil increased                                | 3  | 0  |
| - Il-6 increased                               | 1  | 0  |
| - Leucocytosis                                 | 1  | 2  |
| - ALT/AST increased                            | 27 | 12 |
| - Sgot increased                               | 2  | 0  |
| Metabolism and nutrition disorder              |    |    |
| - Hyperglycaemia                               | 2  | 6  |
| - Hyperkalaemia                                | 0  | 1  |
| - Hyponatraemia                                | 1  | 1  |
| - hypomagnesaemia                              | 0  | 1  |
| Musculoskeletal and connective tissue disorder |    |    |
| - Discitis                                     | 1  | 0  |
| Neoplasms                                      |    |    |
| - Lung cancer                                  | 1  | 0  |
| Nervous system disorder                        |    |    |
| - 6 <sup>th</sup> nerve palsy                  | 0  | 1  |

|                                                |   |   |
|------------------------------------------------|---|---|
| - Dysphasia                                    | 0 | 1 |
| - Cognitive disturbances                       | 1 | 0 |
| - Cerebellar calcification                     | 0 | 1 |
| - Lower limb weakness                          | 1 | 0 |
| - Dysphagia                                    | 0 | 1 |
| - Hemiparesis                                  | 0 | 1 |
| - Headache                                     | 1 | 0 |
| - Intracranial haemorrhage                     | 0 | 1 |
| Psychiatric disorders                          |   |   |
| - Anxiety                                      | 2 | 1 |
| - Delirium                                     | 0 | 2 |
| Renal and urinary disorders                    |   |   |
| - Acute kidney injury                          | 5 | 5 |
| - Haematuria                                   | 1 | 0 |
| - Urinary urgency                              | 1 | 0 |
| Respiratory thoracic and mediastinal disorders |   |   |
| - ARDS                                         |   |   |
| - Wheezing                                     | 1 | 0 |
| - Atelectasis                                  | 0 | 1 |
| - Hypoxia                                      | 0 | 1 |
| - Exacerbation of COPD                         | 5 | 7 |
| - Hoarseness                                   | 3 | 2 |
| - Dyspnoea                                     | 0 | 1 |
| - Pneumonitis                                  | 4 | 3 |
| - Epistaxis                                    | 1 | 0 |
| - Haemoptysis                                  | 3 | 1 |
| - Respiratory failure                          | 0 | 1 |
| - Pneumothorax                                 | 2 | 0 |
| - (subcutaneous emphysema)                     | 0 | 1 |
|                                                | 0 | 1 |
| Reproductive system and breast disorders       |   |   |
| - Endometrium thickening                       | 1 | 0 |

|                                 |   |    |
|---------------------------------|---|----|
| Surgical and medical procedures |   |    |
| - Aortic valve replacement      | 1 | 0  |
| - Loop recorder implant         | 0 | 1  |
| Vascular disorder               |   |    |
| - Aortic aneurysm               | 1 | 0  |
| - Thromboembolic events         |   |    |
| ○ DVT                           | 1 | 0  |
| ○ Bilateral pedal vasculopathy  | 0 | 1  |
| ○ Pulmonary embolism            | 1 | 1  |
| - Hypertension                  | 0 | 1  |
| Death                           | 9 | 10 |

**Supplementary Table 2: All adverse events**
