# Supplementary material for: Leflunomide treatment for patients hospitalised with COVID-19: DEFEAT-COVID randomised controlled trial
Source: PubMed Central journal article supplement — BMJ Open. 2023 Apr 13;13(4):e068179. doi: 10.1136/bmjopen-2022-068179 (PMC10105917; doi:10.1136/bmjopen-2022-068179), 2023-04-13
Supplement: bmjopen-2022-068179supp004.pdf [file bmjopen-2022-068179supp004.pdf]

|                                                             |                         | Baseline                              |       | Day 1 – 3/4                           |       | Day 4/5 – Discharge                   |       |
|-------------------------------------------------------------|-------------------------|---------------------------------------|-------|---------------------------------------|-------|---------------------------------------|-------|
|                                                             |                         | UK                                    | India | UK                                    | India | UK                                    | India |
| <b>ALT</b>                                                  |                         |                                       |       |                                       |       |                                       |       |
| <b>SOC + L</b>                                              | <b>Median (IQR) U/L</b> | 48 (30-60)<br>48 (32-71)   47 (29-59) |       | 67 (36-87)<br>59 (37-94)   72 (34-86) |       | 44 (36-71)<br>62(34-151)   42(35-56)  |       |
|                                                             | <b>1 - 2 x ULN (n)</b>  | 44<br>12   32                         |       | 50<br>9   41                          |       | 17<br>4   13                          |       |
|                                                             | <b>2 - 3 x ULN (n)</b>  | 1<br>1   0                            |       | 6<br>3   3                            |       | 6<br>2   4                            |       |
|                                                             | <b>&gt; 3 x ULN (n)</b> | 1<br>1   0                            |       | 8<br>3   5                            |       | 5<br>4   1                            |       |
|                                                             | <b>&gt;ULN</b>          | 14   32                               |       | 15   49                               |       | 10   18                               |       |
| <b>SOC</b>                                                  | <b>Median (IQR) U/L</b> | 39 (26-56)<br>40 (27-59)   38 (25-54) |       | 44 (34-65)<br>44 (31-63)   44 (36-67) |       | 41 (35-52)<br>49 (33-63)   40 (35-52) |       |
|                                                             | <b>1 - 2 x ULN (n)</b>  | 33<br>13   20                         |       | 29<br>8   21                          |       | 24<br>7   17                          |       |
|                                                             | <b>2 - 3 x ULN (n)</b>  | 0<br>0   0                            |       | 9<br>2   7                            |       | 3<br>2   1                            |       |
|                                                             | <b>&gt;3 x ULN (n)</b>  | 0<br>0   0                            |       | 0<br>0   0                            |       | 0<br>0   0                            |       |
|                                                             | <b>&gt;ULN</b>          | 13   20                               |       | 10   28                               |       | 9   18                                |       |
| <b>p value of abnormal ALT counts between SOC+L and SOC</b> |                         | <b>0.049</b>                          |       | <b>&lt;0.001</b>                      |       | <b>0.633</b>                          |       |
| <b>AST</b>                                                  |                         |                                       |       |                                       |       |                                       |       |
| <b>SOC + L</b>                                              | <b>Median (IQR) U/L</b> | 44 (30-54)<br>60 (42-102)   43(29-50) |       | 55(31-77)<br>58 (42-104)   53 (28-76) |       | 41(27-50)<br>54 (29-102)   40 (27-49) |       |
|                                                             | <b>1 - 2 x ULN (n)</b>  | 28<br>4   24                          |       | 36<br>8   28                          |       | 18<br>3   15                          |       |
|                                                             | <b>2 - 3 x ULN (n)</b>  | 2<br>2   0                            |       | 9<br>2   7                            |       | 1<br>1   0                            |       |
|                                                             | <b>&gt; 3 x ULN (n)</b> | 1<br>1   0                            |       | 6<br>2   4                            |       | 1<br>1   0                            |       |
|                                                             | <b>&gt;ULN</b>          | 7   24                                |       | 12   39                               |       | 5   15                                |       |
| <b>SOC</b>                                                  | <b>Median (IQR) U/L</b> | 39 (28-52)<br>57 (34-75)   37(26-48)  |       | 39 (29-54)<br>45(38-55)   38(28-54)   |       | 37(27-47)<br>45 (35-61)   37 (25-46)  |       |
|                                                             | <b>1 - 2 x ULN (n)</b>  | 22<br>6   16                          |       | 18<br>4   14                          |       | 16<br>4   12                          |       |
|                                                             | <b>2 - 3 x ULN (n)</b>  | 2<br>2   0                            |       | 5<br>0   5                            |       | 0<br>0   0                            |       |
|                                                             | <b>&gt;3 x ULN (n)</b>  | 0<br>0   0                            |       | 1<br>0   1                            |       | 1<br>1   0                            |       |
|                                                             | <b>&gt;ULN</b>          | 8   16                                |       | 4   20                                |       | 5   12                                |       |
| <b>p value of abnormal ALT counts between SOC+L and SOC</b> |                         | <b>0.3222</b>                         |       | <b>&lt;0.001</b>                      |       | <b>0.318</b>                          |       |

**Supplementary Table 3: Liver enzymes measurements**

ULN: upper limits of normal (ALT: 10-49 U/L; AST 19 – 48U/L). ALT: alanine transaminase. AST: aspartate transaminase; SOC + L: n = 30 UK, 74 India; SOC: n = 36 UK, 74 India
