# Supplementary material for: Leflunomide treatment for patients hospitalised with COVID-19: DEFEAT-COVID randomised controlled trial
Source: PubMed Central journal article supplement — BMJ Open. 2023 Apr 13;13(4):e068179. doi: 10.1136/bmjopen-2022-068179 (PMC10105917; doi:10.1136/bmjopen-2022-068179), 2023-04-13
Supplement: bmjopen-2022-068179supp005.pdf [file bmjopen-2022-068179supp005.pdf]

|                               | Day 28          |                 |               |                 |       | Day 90          |                 |               |                 |    |
|-------------------------------|-----------------|-----------------|---------------|-----------------|-------|-----------------|-----------------|---------------|-----------------|----|
|                               | SOC+L<br>(n=81) |                 | SOC<br>(n=91) |                 | p*    | SOC+L<br>(n=81) |                 | SOC<br>(n=91) |                 | p* |
|                               | %               | Median<br>(IQR) | %             | Median (IQR)    |       | %               | Median (IQR)    | %             | Median (IQR)    |    |
| <b>Fatigue</b>                | 29.6            | 5.00(2.75-8.00) | 31.9          | 5.00(3.00-8.00) | 0.751 | 22.2            | 5.00(3.25-7.00) | 26.4          | 3.00(2.00-4.25) | NS |
| <b>Cough</b>                  | 13.6            | 2.00(1.00-4.50) | 18.7          | 2.00(1.00-4.00) | 0.366 | 7.41            | 1.00(1.00-6.25) | 8.79          | 2.50(1.00-3.50) | NS |
| <b>Anxiety</b>                | 24.7            | 3.50(2.00-7.25) | 19.8          | 4.00(3.00-7.75) | 0.438 | 21.0            | 3.00(1.00-5.00) | 19.8          | 2.00(1.00-3.75) | NS |
| <b>Chest pains</b>            | 11.1            | 4.00(2.00-7.00) | 8.79          | 4.00(2.50-5.00) | 0.611 | 7.41            | 4.00(3.25-7.75) | 6.59          | 3.00(1.25-7.75) | NS |
| <b>Brain fog</b>              | 14.8            | 5.00(3.75-7.25) | 16.5          | 5.00(1.50-7.00) | 0.764 | 14.8            | 3.50(1.75-5.00) | 12.1          | 4.00(2.50-4.50) | NS |
| <b>Breathlessness</b>         | 40.7            | 2.00(1.00-6.00) | 42.9          | 1.00(1.00-7.00) | 0.779 | 22.2            | 5.00(1.00-7.00) | 20.9          | 4.00(2.00-4.00) | NS |
| <b>Sleep quality</b>          | 48.2            | 2.00(1.00-5.00) | 38.5          | 3.00(1.00-6.00) | 0.200 | 34.6            | 2.00(1.00-4.25) | 33.0          | 2.50(1.00-5.75) | NS |
| <b>Palpitations</b>           | 8.64            | 7.00(1.50-9.00) | 5.49          | 1.00(1.00-7.00) | 0.419 | 4.94            | 4.50(3.50-5.00) | 3.30          | 1.00(1.00-4.00) | NS |
| <b>Joint pain</b>             | 32.1            | 3.00(1.00-4.75) | 33.0          | 2.00(1.00-4.00) | 0.903 | 22.2            | 3.50(2.00-7.00) | 19.8          | 2.00(2.00-4.50) | NS |
| <b>Myalgia</b>                | 18.5            | -               | 19.8          |                 | 0.834 | 17.3            |                 | 11.0          |                 | NS |
| <b>Anosmia</b>                | 6.17            | -               | 11.0          |                 | 0.264 | 2.47            |                 | -             |                 | -  |
| <b>Loss of taste</b>          | 9.88            | -               | 14.3          |                 | 0.378 | 7.41            |                 | -             |                 | -  |
| <b>Depression</b>             | 19.8            | 1.50(1.00-3.00) | 18.7          | 1.00(1.00-2.00) | 0.859 | 11.1            | 1.00(1.00-1.00) | 11.0          | 1.00(1.00-2.00) | NS |
| <b>Loss of interest</b>       | 12.4            | 2.50(1.25-3.00) | 16.5          | 1.00(1.00-3.00) | 0.442 | 9.88            | 1.00(1.00-1.25) | 7.69          | 1.00(1.00-2.50) | NS |
| <b>Dyspnoea;<br/>Mild (1)</b> | 59.3            | 1.00(1.00-2.00) | 47.3          | 2.00(1.00-2.00) | 0.155 | 80.3            | 1.00(1.00-1.00) | 81.3          | 1.00(1.00-1.00) | NS |
| <b>Moderate (2-3)</b>         | 29.6            |                 | 39.6          |                 | 0.173 | 14.8            |                 | 17.6          |                 |    |
| <b>Severe (4-5)</b>           | 11.1            |                 | 13.2          |                 | 0.678 | 4.94            |                 | 1.10          |                 |    |

**Supplementary Table 4: Long COVID symptoms at 28 and 90 days after randomisation**

*p*; alpha value. Statistical significance was assumed at 0.05 alpha value. To best summarise the data, symptom scales (e.g. 0-10) for all symptoms (except dyspnoea, which was measured in different terms) were binarized, accepting any score above 0 as prevalence (%) of experiencing that symptom. To reflect magnitude of symptom severity, median (IQR) of individual symptom scores (except for dyspnoea, myalgia, anosmia and loss of taste) were taken excluding scores of 0. For dyspnoea, prevalence (%) of the symptom was determined as the proportion of patients scoring any relevant category (e.g., mild, moderate, severe), and median (IQR) of symptom severity included all score values. Between-group differences at each point of follow-up (day 28 and day 90) for all symptoms were evaluated using patient proportions from the binarized symptom scales via the chi-square test of differences. The Shapiro-wilk test was used to assess statistical normality. No analysis was enabled for any day reporting  $n \leq 3$  datapoints per group for statistical reliability
